# Supplementary material
Source: PubMed Central journal article supplement (PMC6759747)
Supplement: jo9b01253_si_001.pdf [file jo9b01253_si_001.pdf]

# Molecular recognition of lipid II by lantibiotics: Synthesis and conformational studies of analogues of nisin and mutacin ring A and ring B.

## Supporting Information

Rachael Dickman,<sup>†</sup> Serena A. Mitchell,<sup>†</sup> Angelo M. Figueiredo, D. Flemming Hansen<sup>‡\*</sup> and Alethea B. Tabor<sup>†\*</sup>

<sup>†</sup> Department of Chemistry, UCL, 20, Gordon Street, London WC1H 0AJ, United Kingdom.

<sup>‡</sup> Institute of Structural and Molecular Biology, Division of Biosciences, Gower Street, University College London, London WC1E 6BT, United Kingdom

### Supporting Information Contents

|                                                                                     |     |
|-------------------------------------------------------------------------------------|-----|
| <b>Figure S1</b>                                                                    | S2  |
| <b>Figure S2</b>                                                                    | S3  |
| <b>Scheme S1</b> Synthesis of (Alloc, allyl/Fmoc) MeLan <b>8</b>                    | S4  |
| <sup>1</sup> H NMR spectra for novel compounds                                      | S5  |
| <b>Peptide HPLC, mass spectra and NMR Data</b>                                      | S13 |
| <b>Table S1</b> Spectral parameters for 2D spectra                                  | S13 |
| HPLC, mass spectra, NMR assignments ( <b>Tables S2 – S9</b> ) for Ring B Peptides   | S14 |
| HPLC, mass spectra, NMR assignments ( <b>Tables S10 – S17</b> ) for Ring A Peptides | S36 |
| XPLOR-NIH Parameterisation Data                                                     | S72 |
| <b>Table S18</b> Structure Statistics                                               | S78 |
| <b>Tables S19, S20</b> Dihedral Angle Data                                          | S79 |
| <b>References</b>                                                                   | S80 |

**Figure S1:** ESI mass spectrum showing presence of oxidised lanthionine after 1 h at 0 °C with 1 eq NaIO<sub>4</sub>. Target peptide (**A**) [M+H]<sup>+</sup> 557.33, peptide with oxidised lanthionine (**B**) [M+H]<sup>+</sup> 573.27.

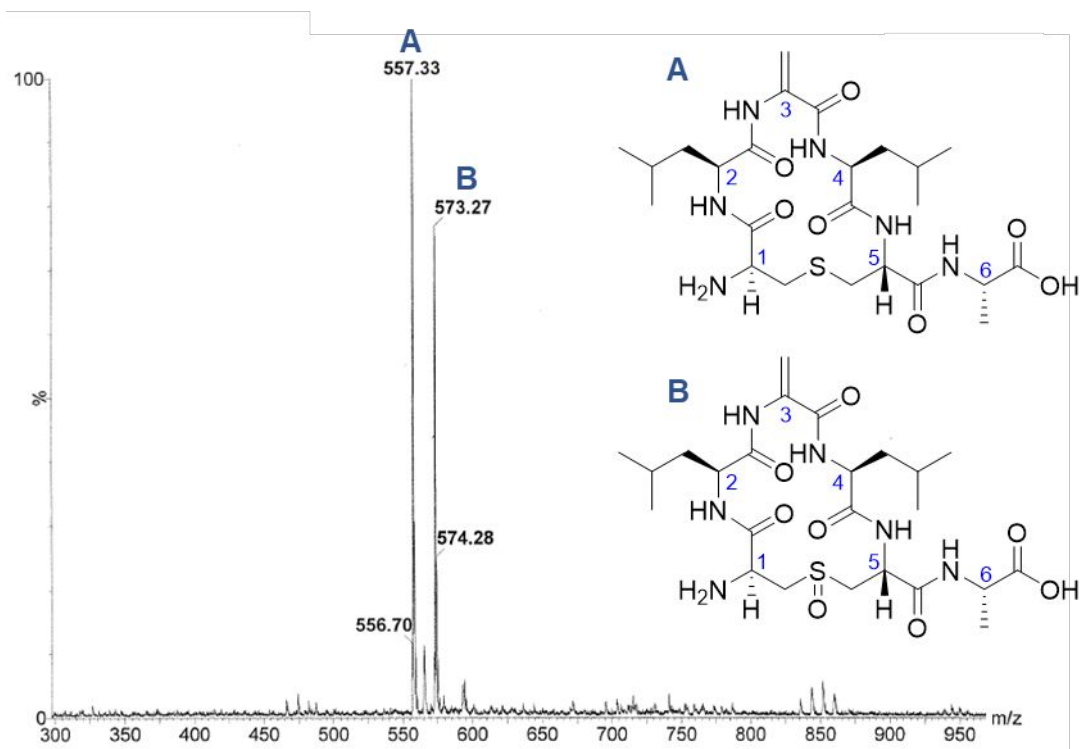

**Figure S2:**  $^1\text{H}$  NMR spectra of mutacin I ring B 1. **A.** Taken at rt. \* = major conformer, \* = minor conformer. **B.** Taken at 80 °C.

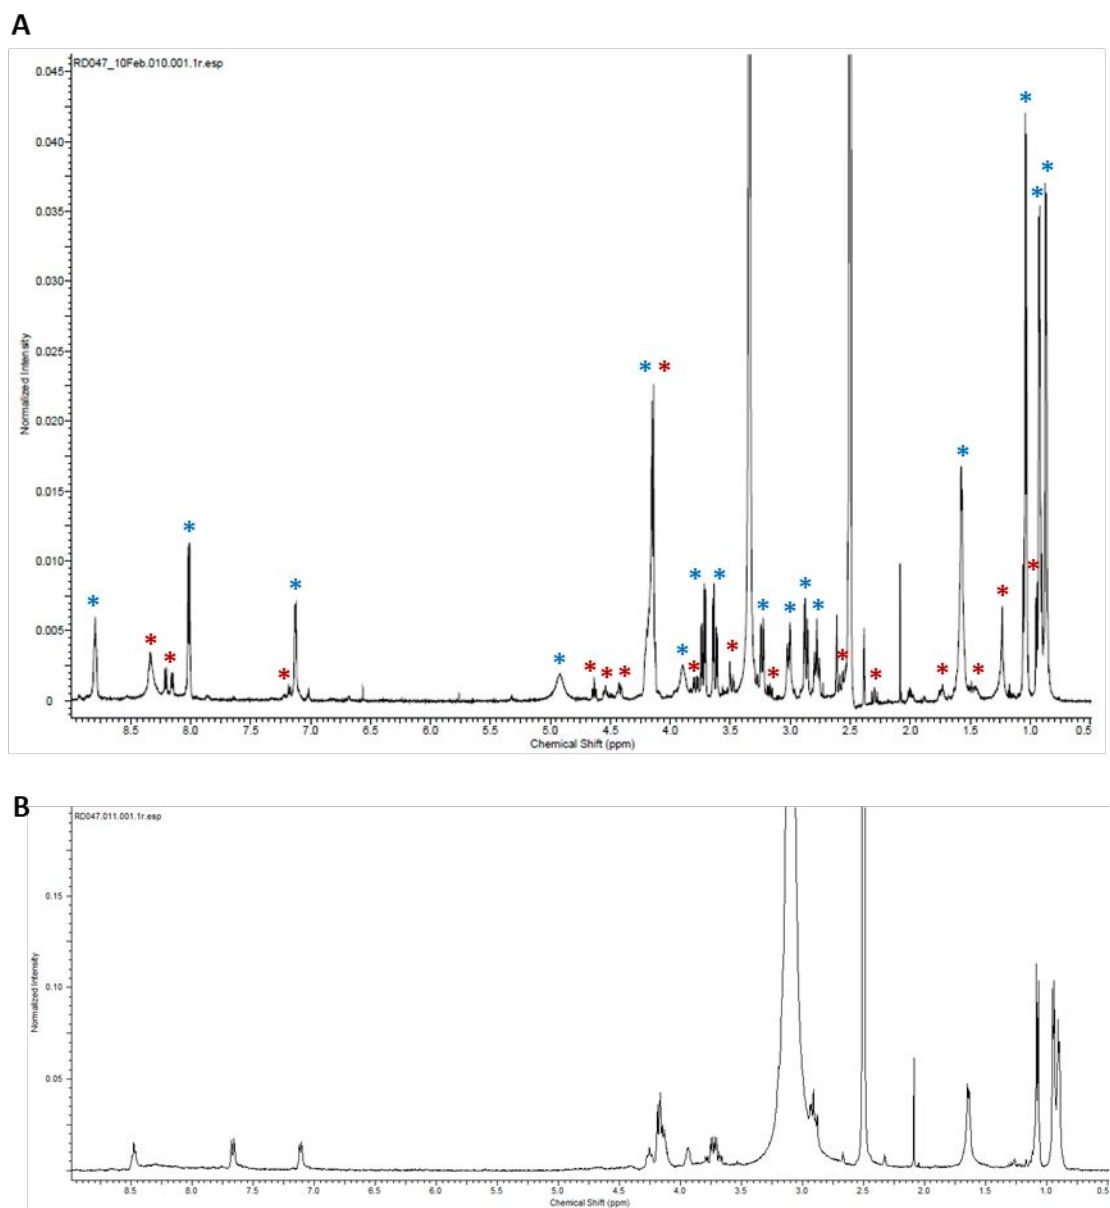

### Scheme S1 Synthesis of (Alloc, allyl/Fmoc) MeLan 8

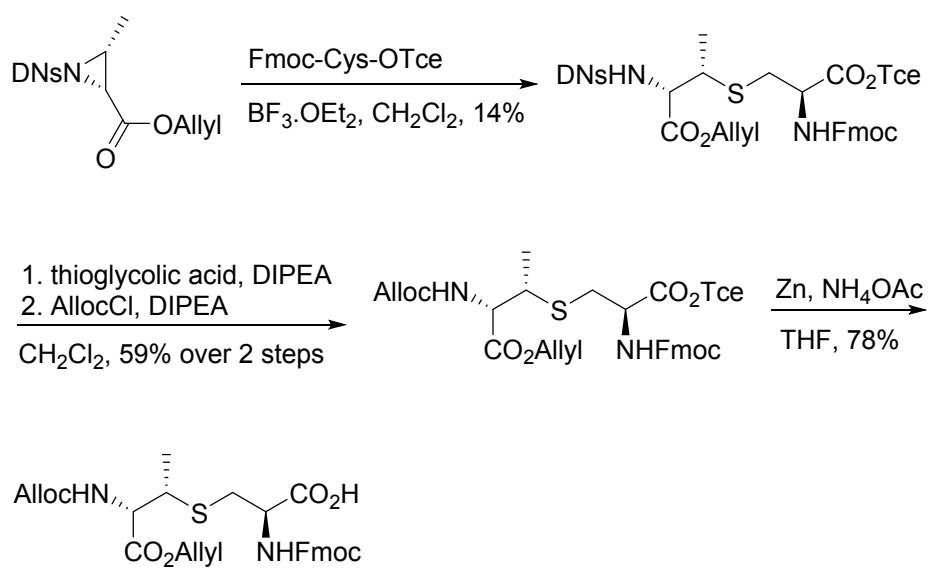

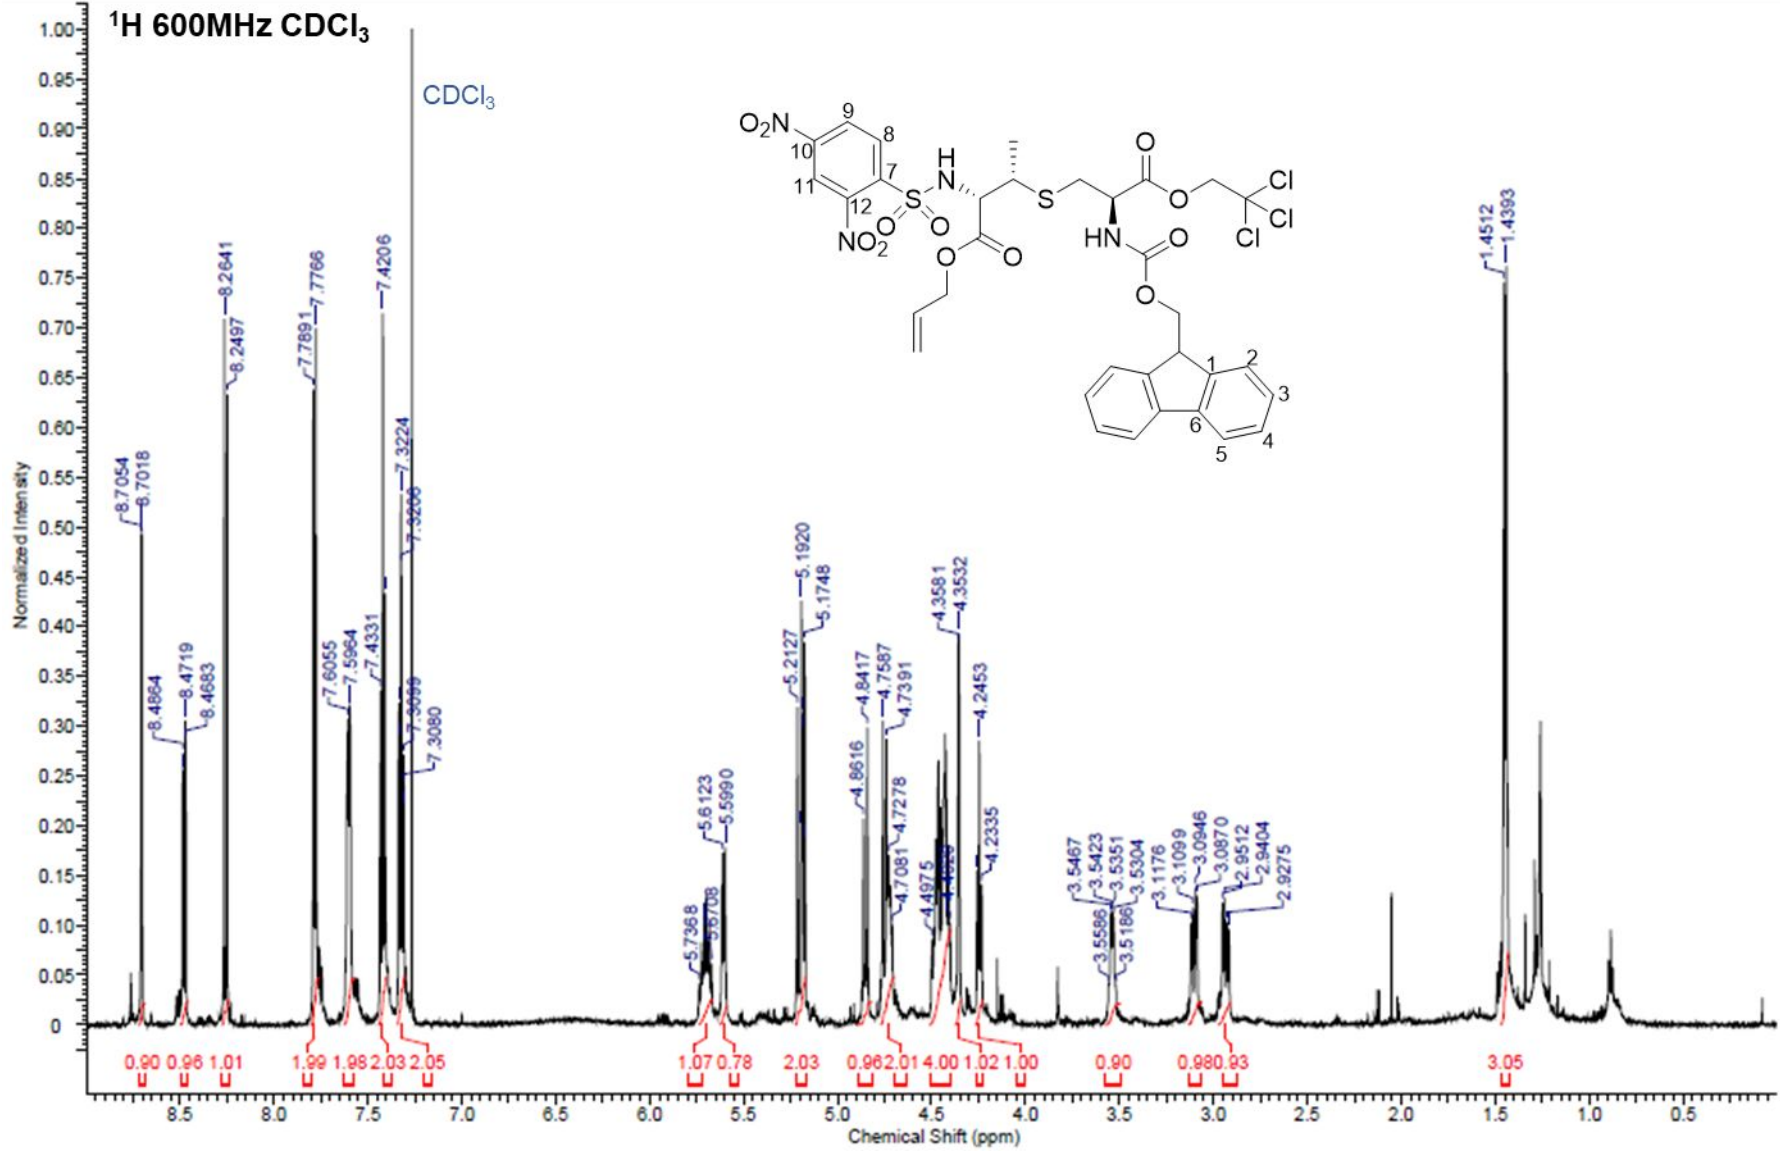

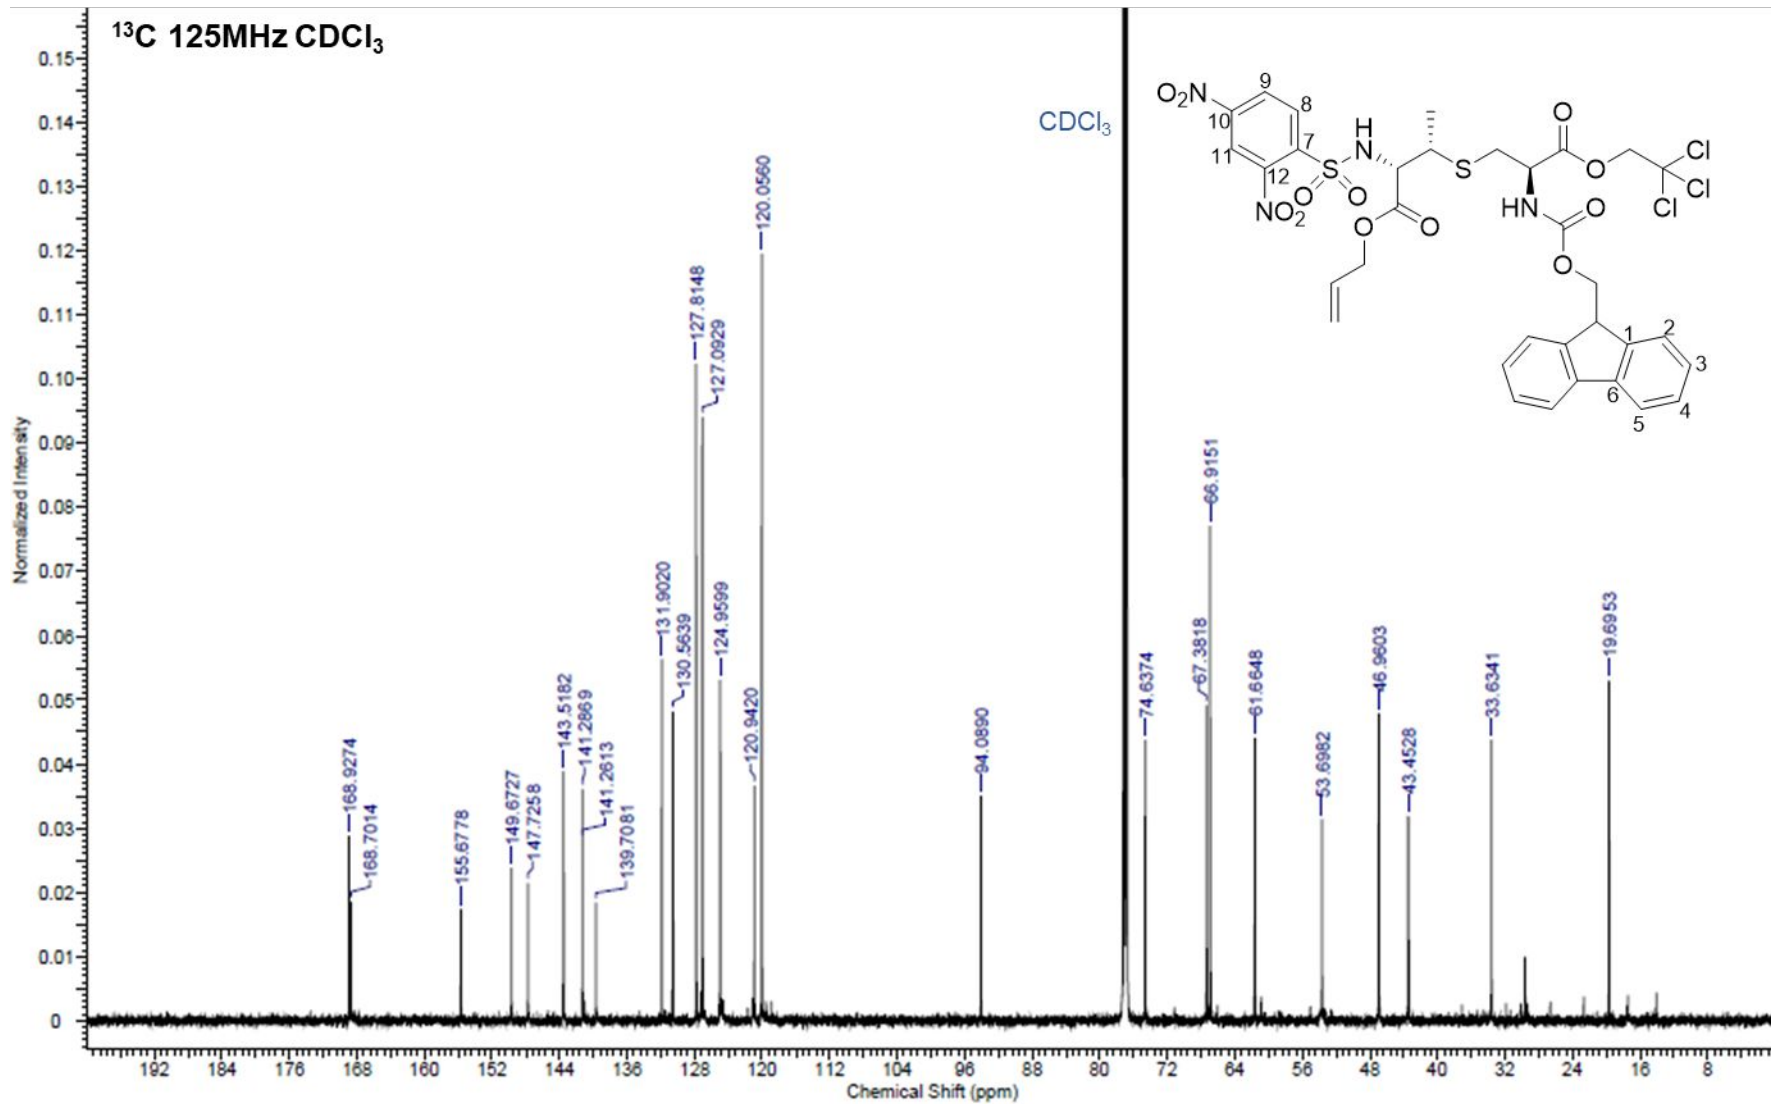

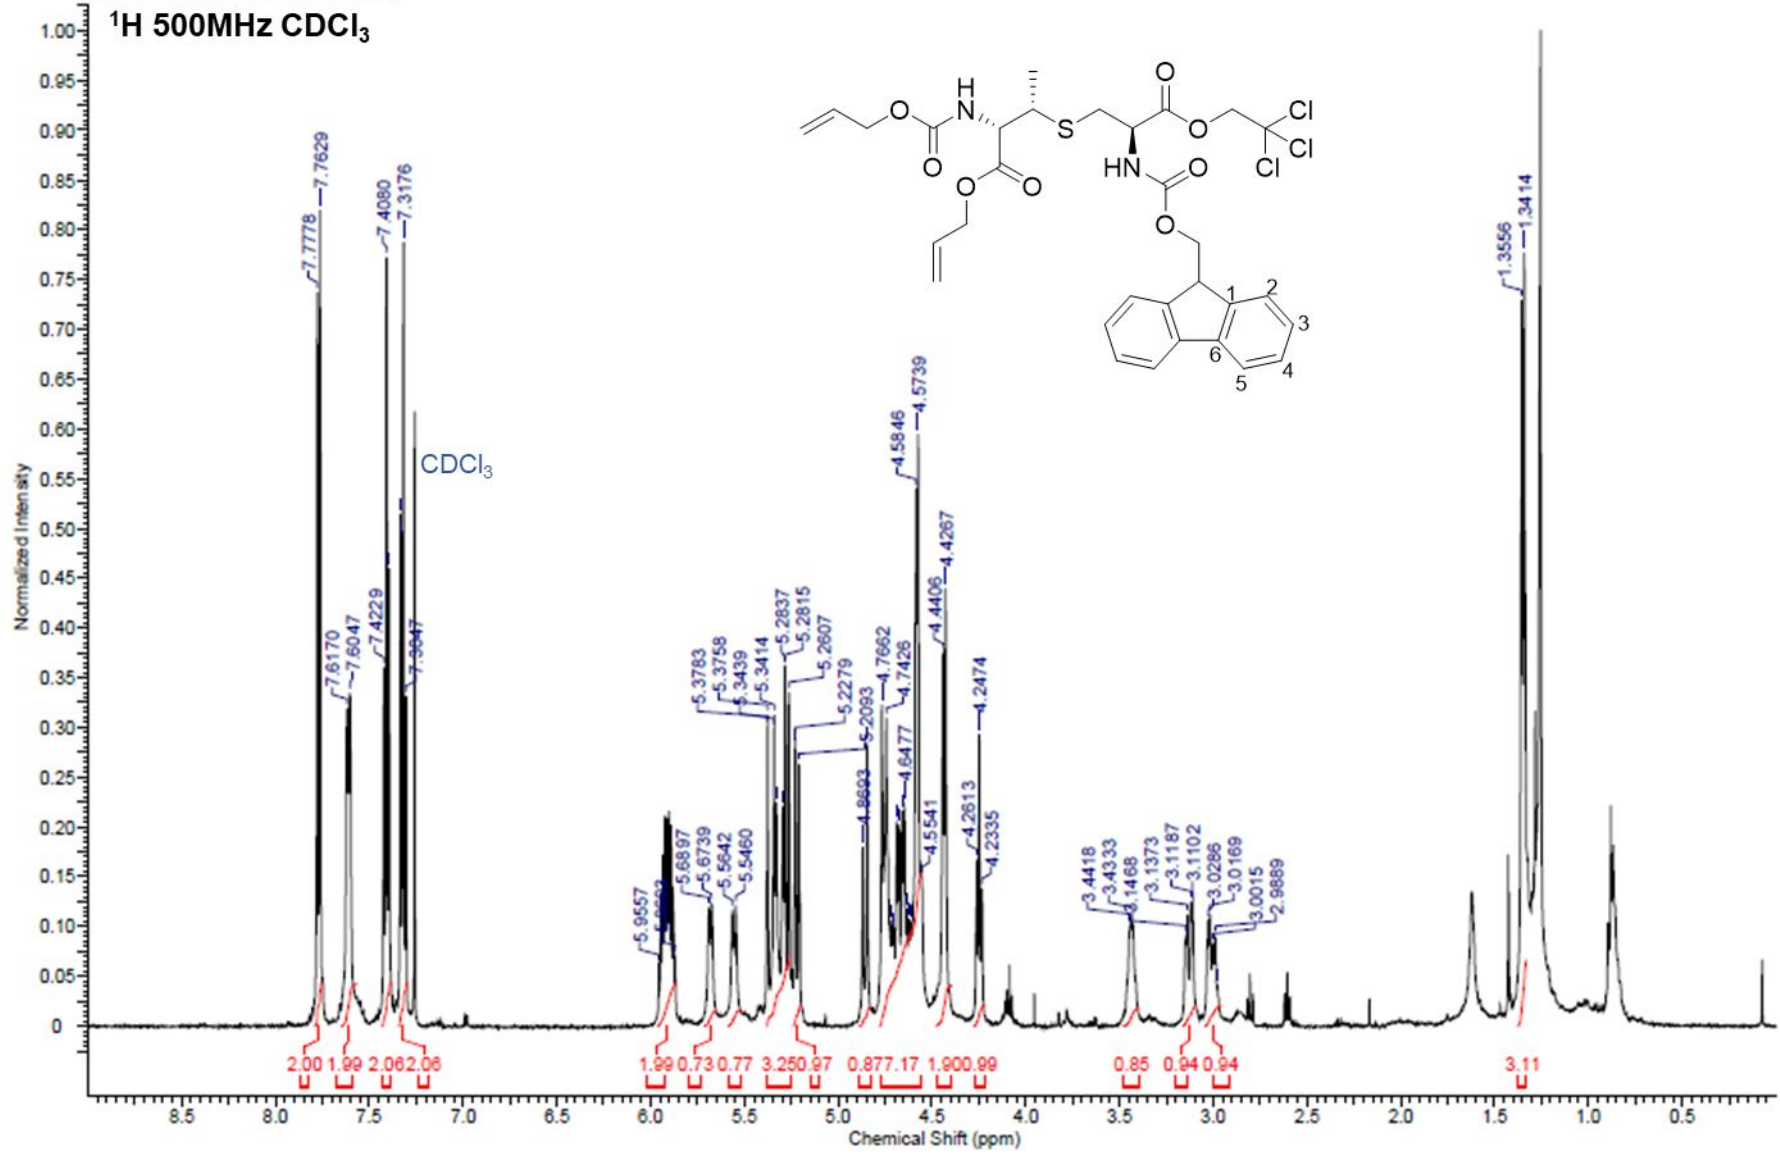

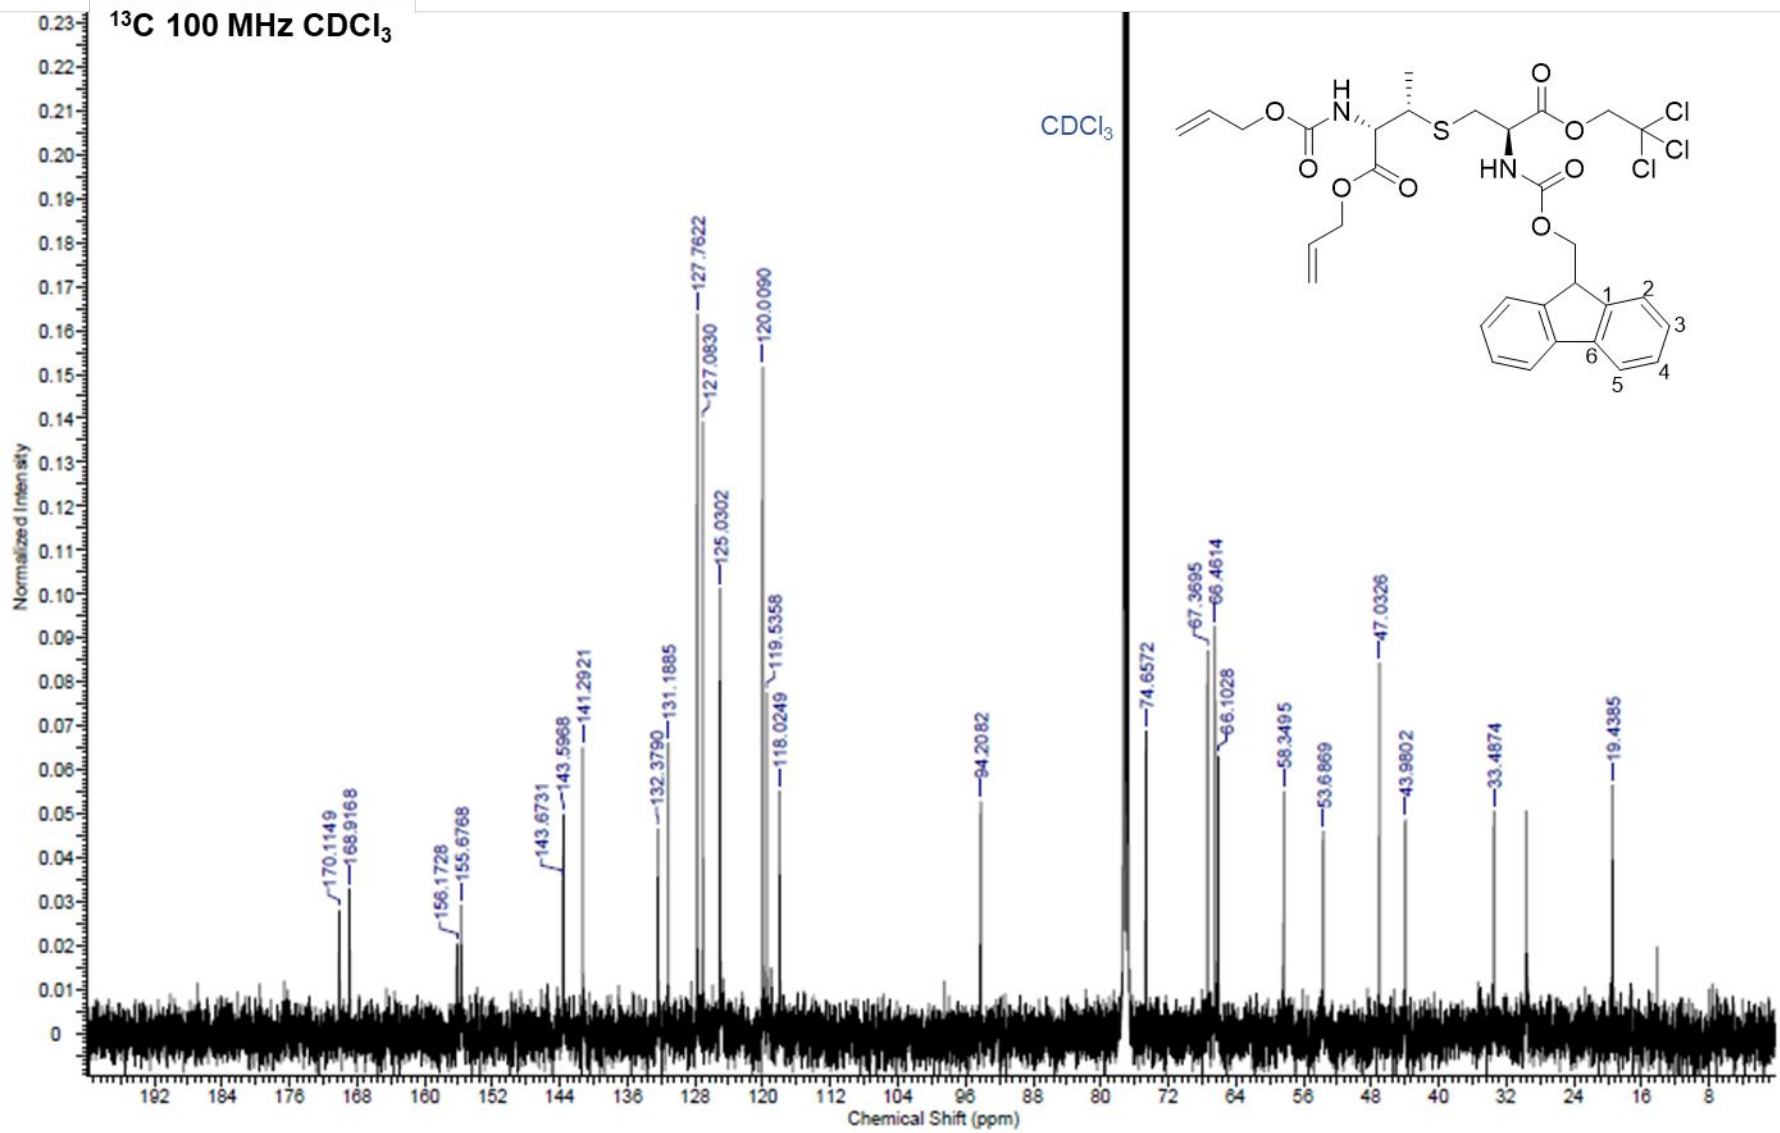



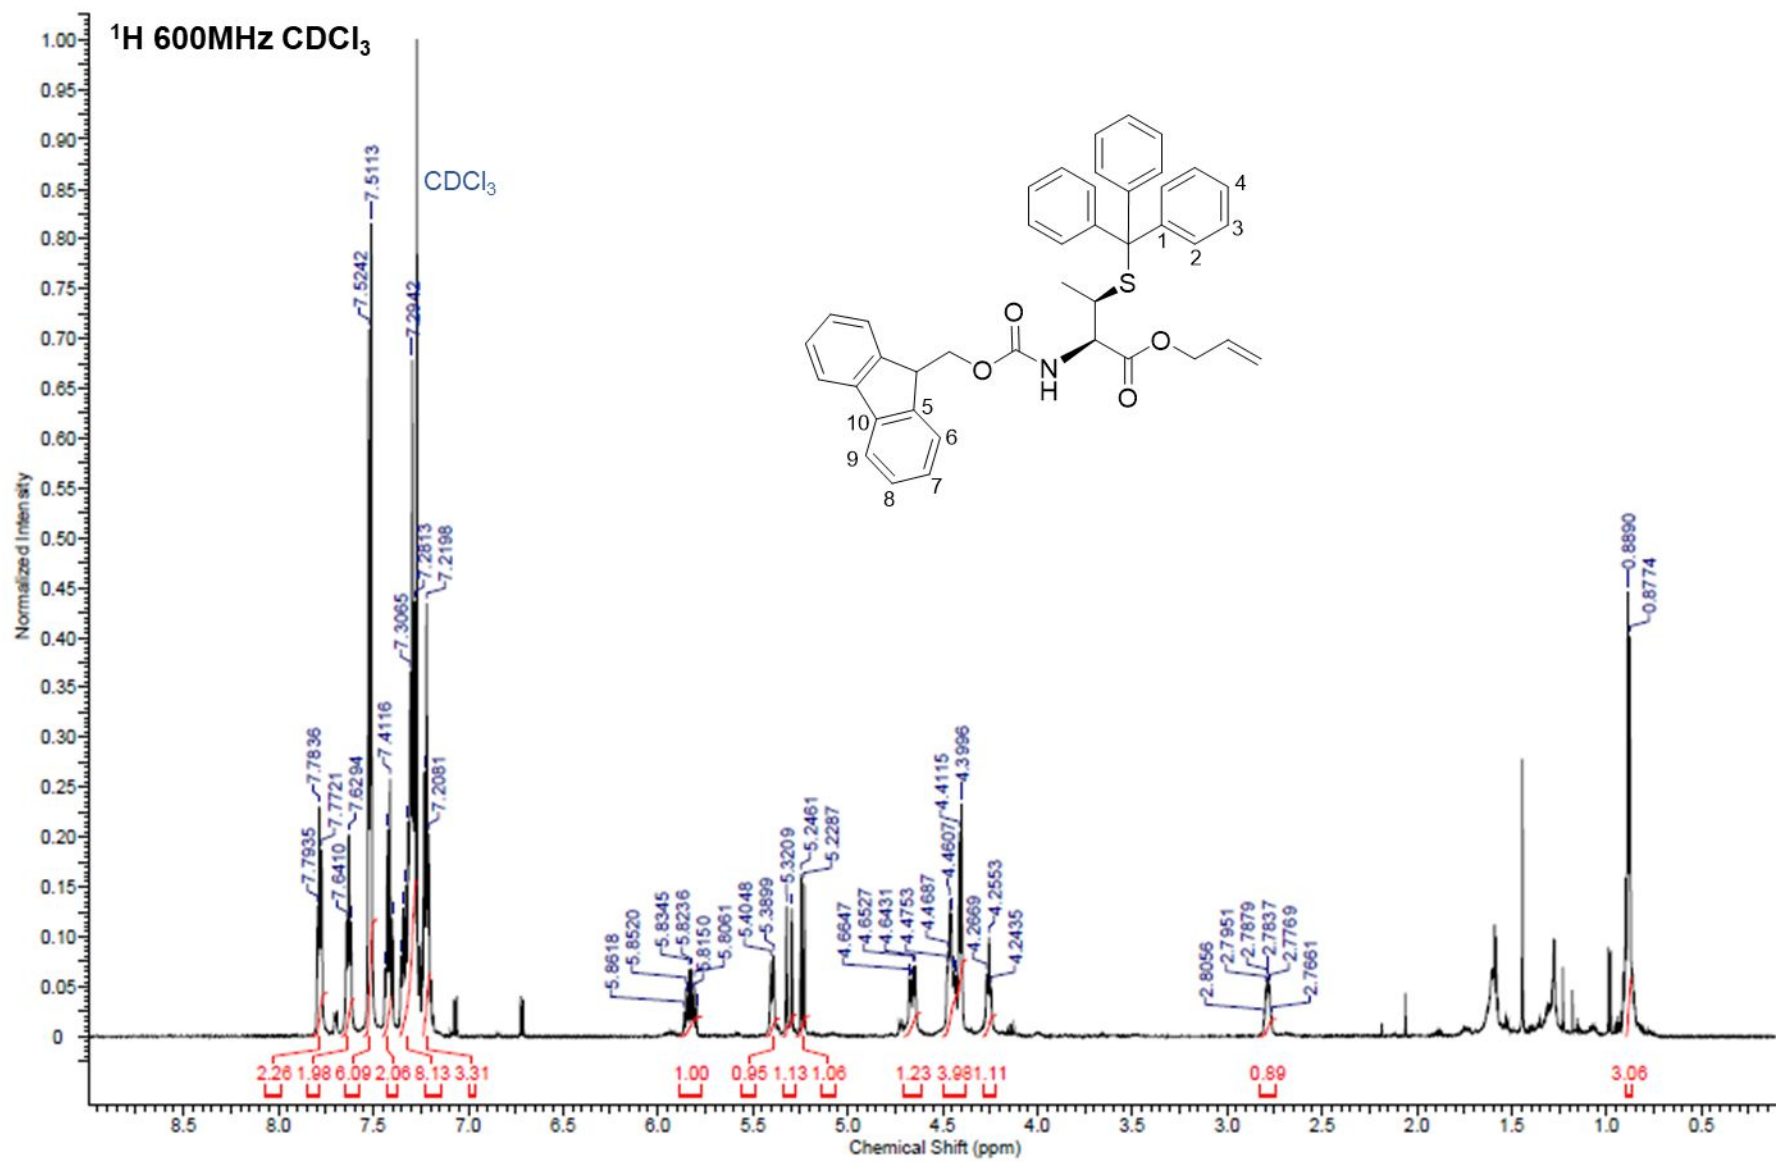

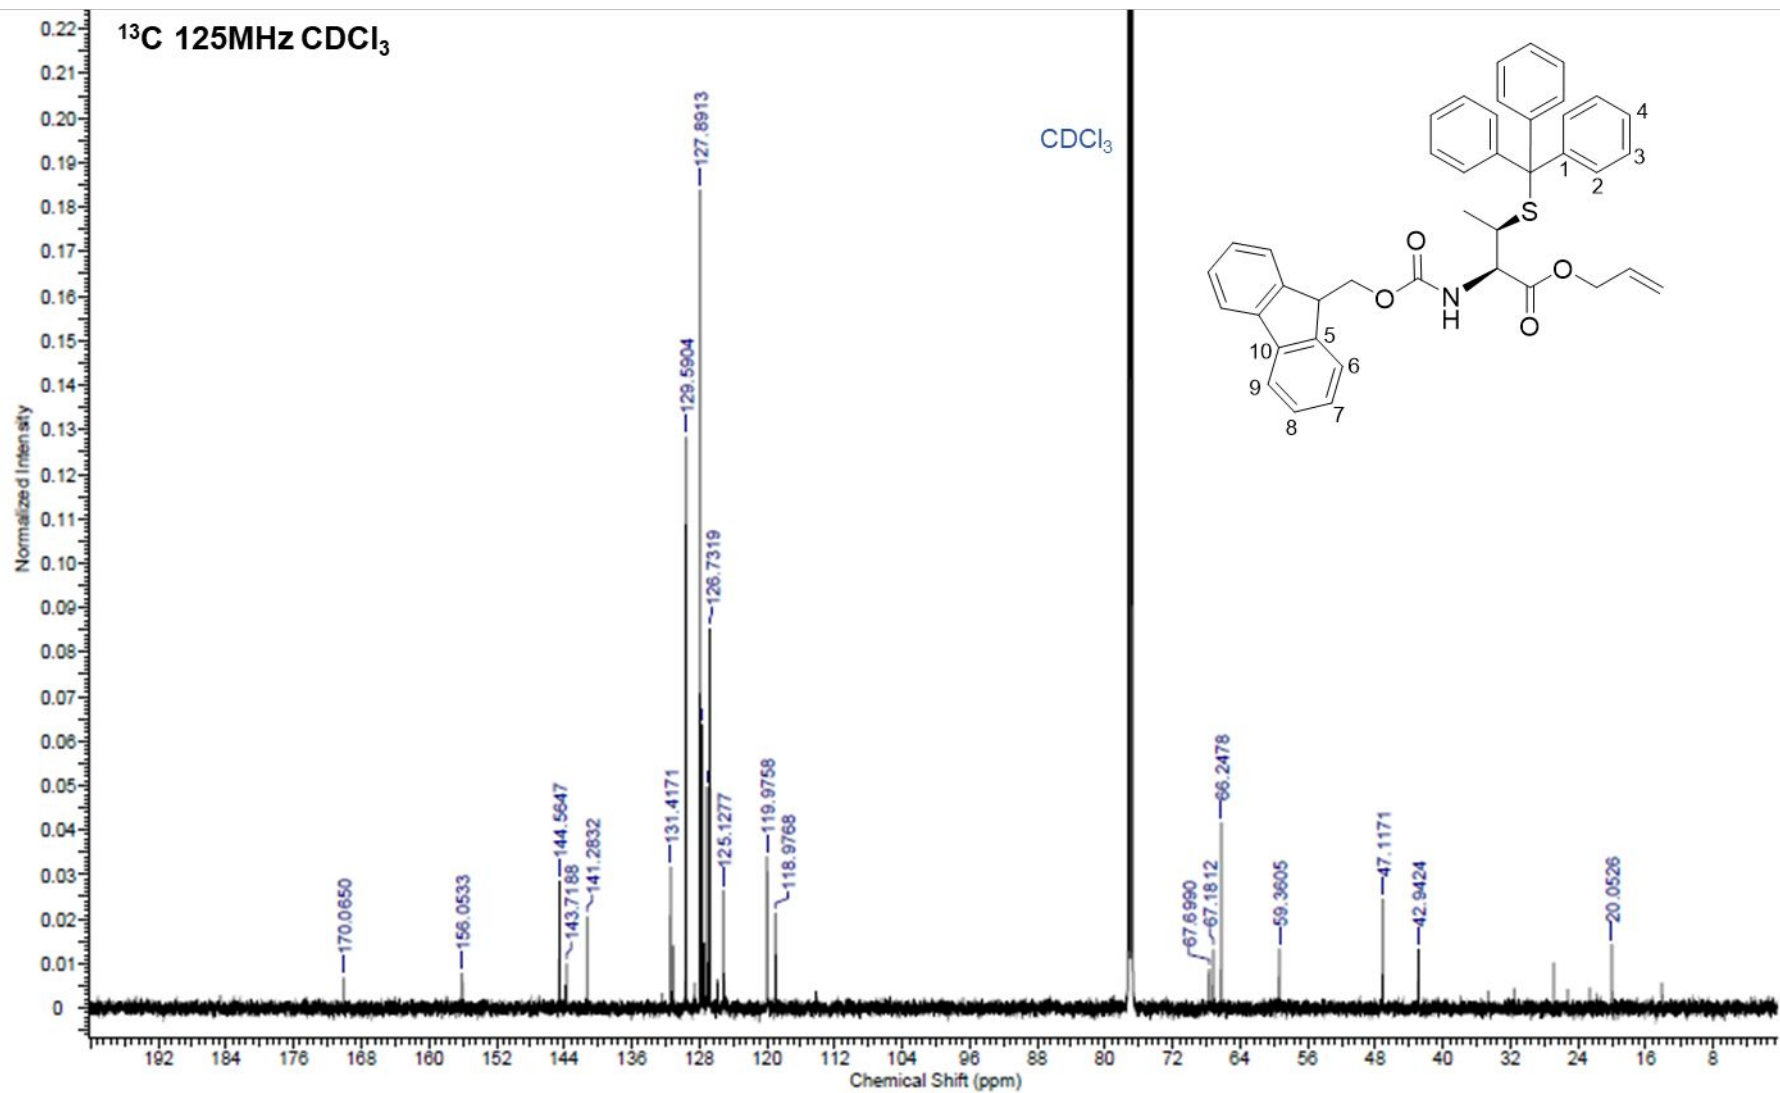

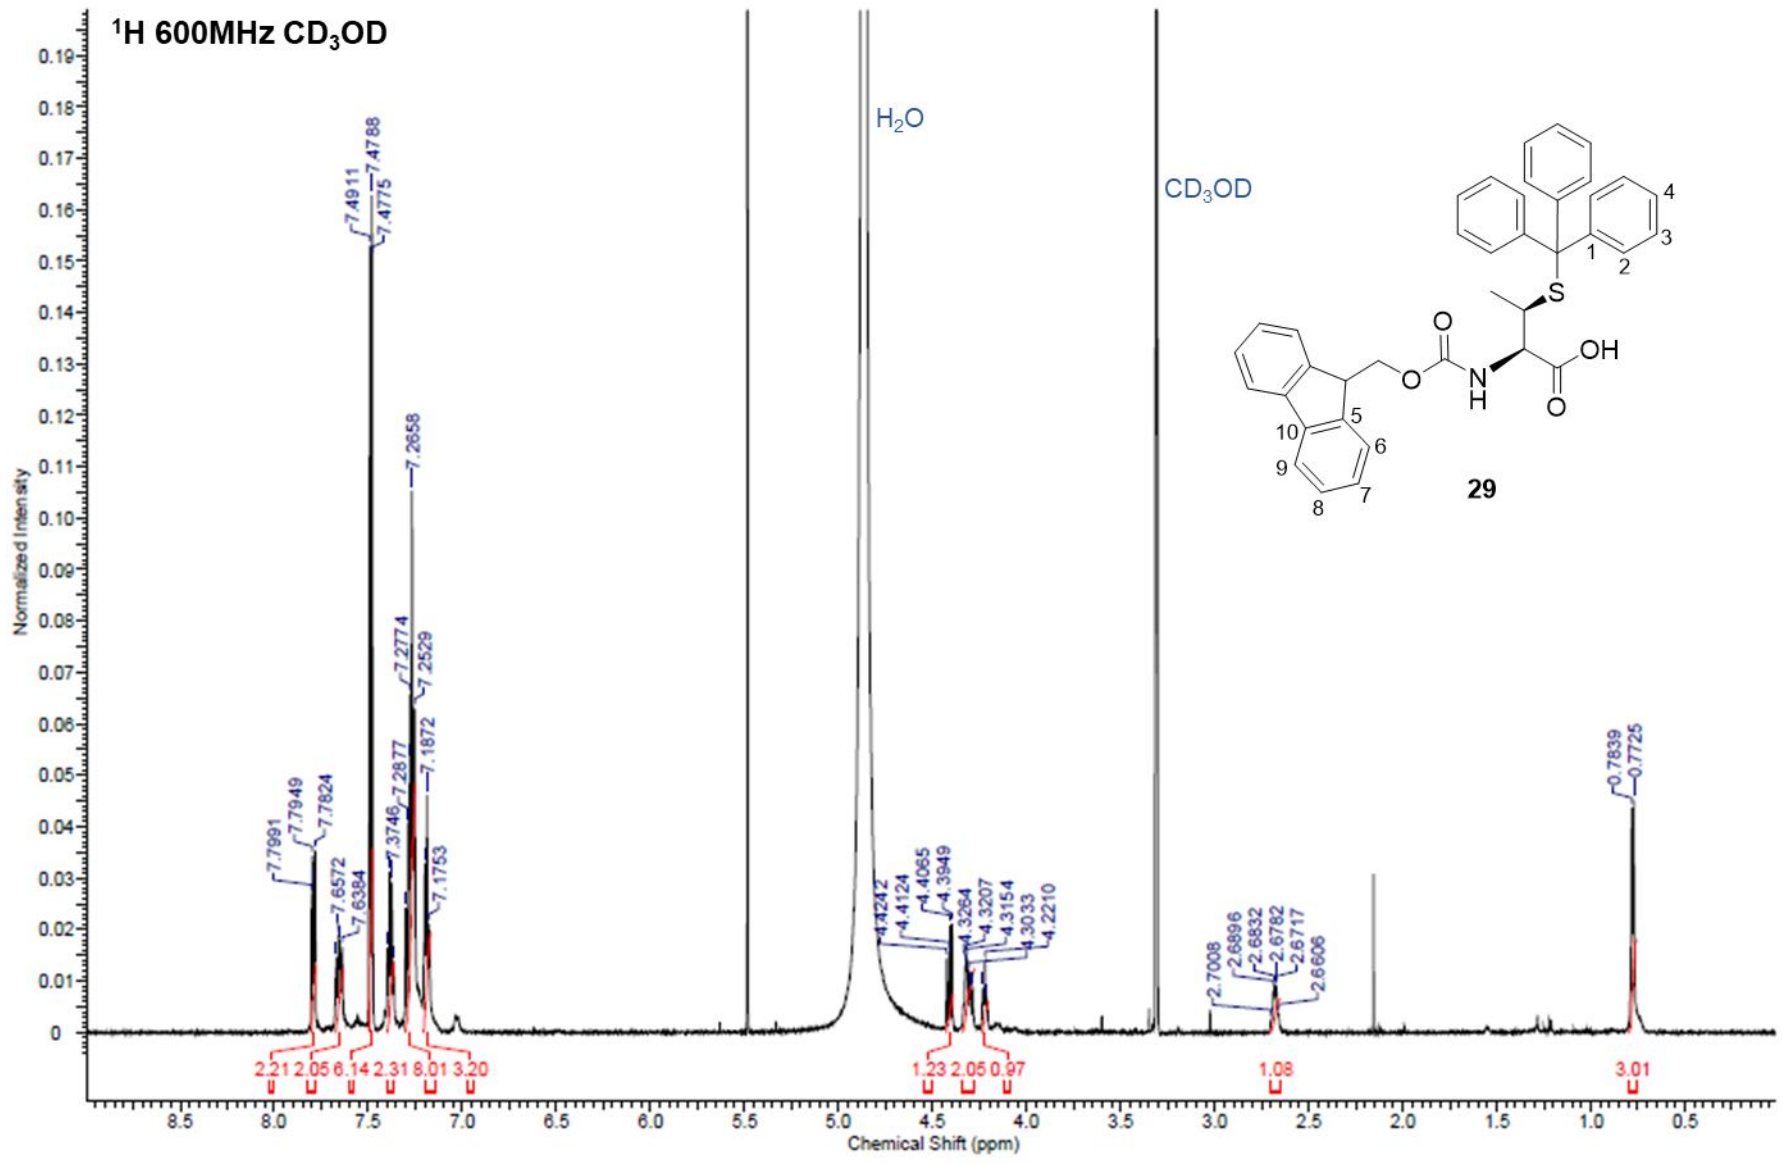

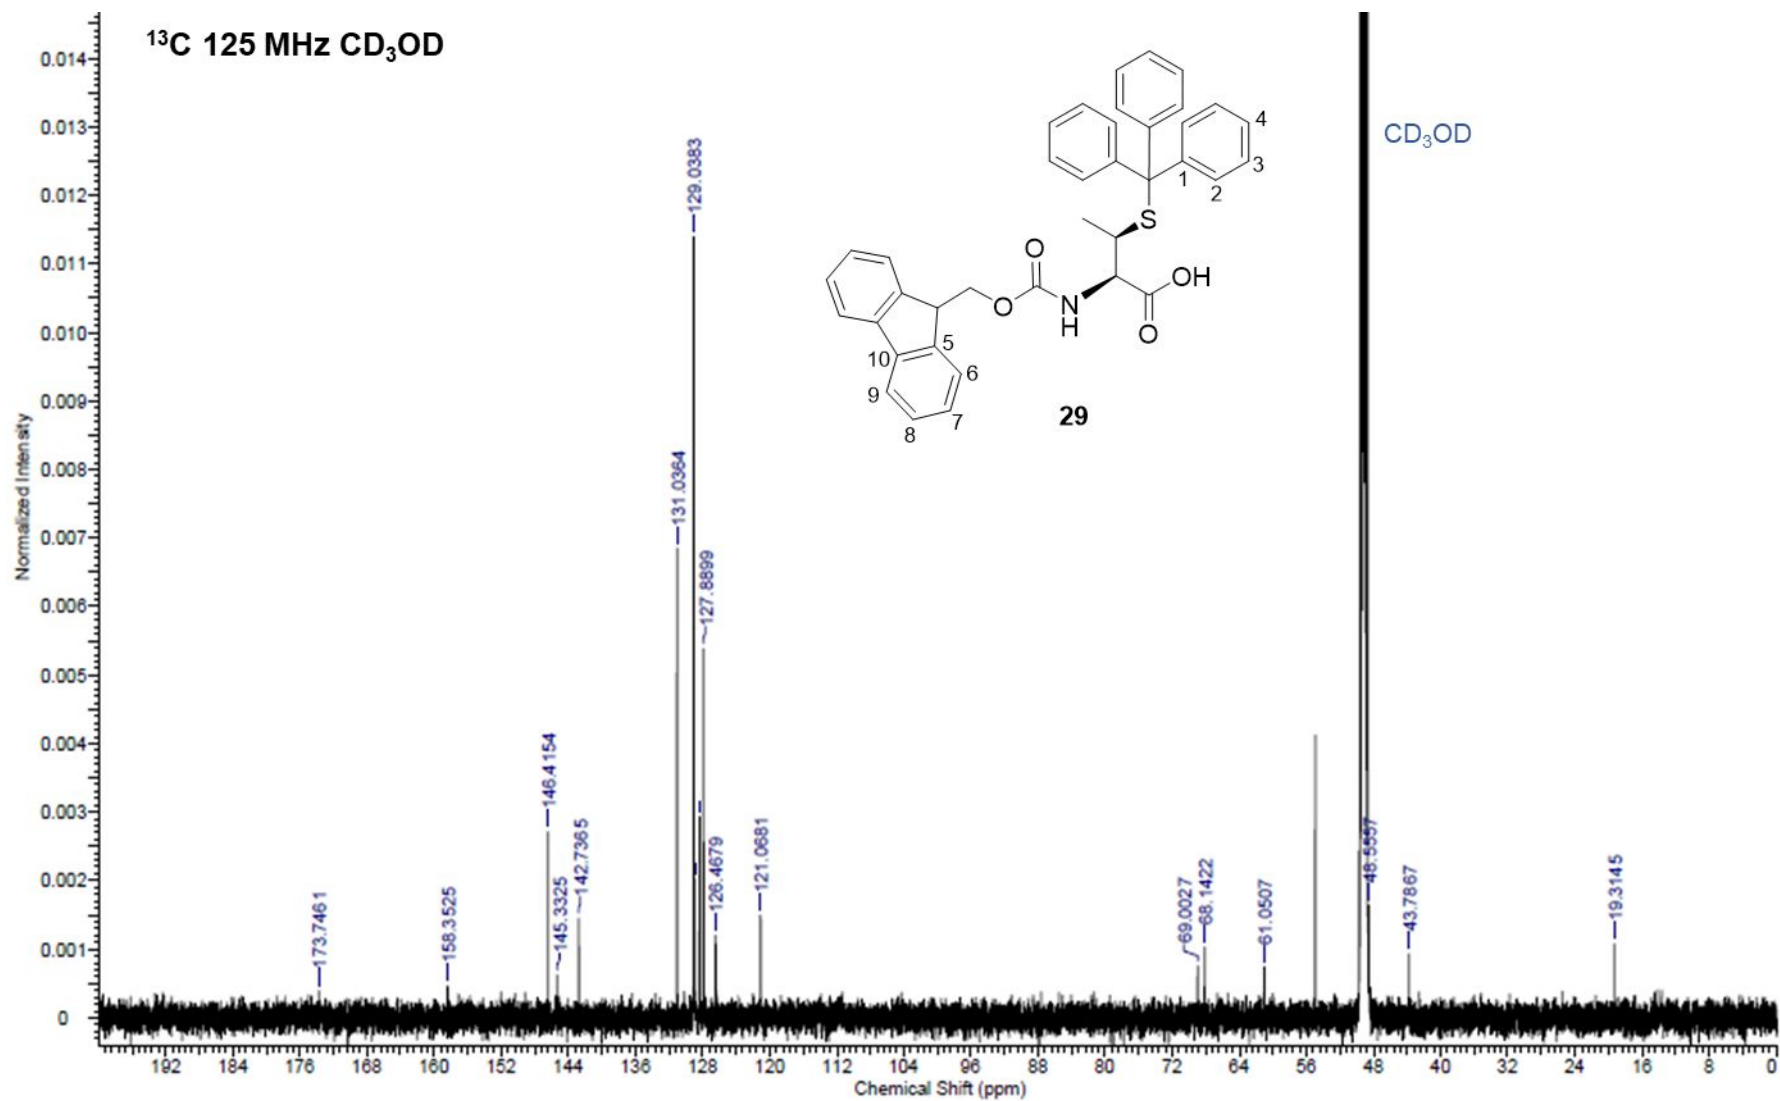

## **Peptide HPLC, mass spectra and NMR Data**

Peptide samples for NMR were prepared by dissolving the lyophilised powders in 0.3 mL anhydrous deuterated  $d_6$ -DMSO.

All 1D and 2D NMR spectra were recorded on a Bruker Avance 600 MHz spectrometer and standard pulse sequences within the Bruker pulse sequence library were used. All spectra were referenced in the directly detected dimension using the solvent signal. For 2D  $^{13}\text{C}$ - $^1\text{H}$  HSQC and HMBC spectra the  $^{13}\text{C}$  dimension was referenced indirectly. Chemical shifts ( $\delta$ ) are given in ppm relative to TMS, and coupling constants ( $J$ ) are given in Hz.

Sweep widths for 1D NMR spectra were  $^1\text{H}$  13 ppm,  $^{13}\text{C}$  240 ppm. Spectral parameters for 2D spectra are summarised in Table S1. For 2D  $^1\text{H}$ - $^1\text{H}$  NOESY spectra, 64 scans were recorded with 2048 points in the direct and indirect dimensions for all peptides except mutacin I ring A (**12**) and mutacin ring A truncated (Ser5, Ala8) analogue (**15**), for which 1024 points were recorded in both dimensions. A mixing time of 600 ms was used for all NOESY spectra.

Chemical shift assignments were derived manually from COSY, TOCSY, NOESY,  $^1\text{H}$ - $^{13}\text{C}$  HSQC and  $^1\text{H}$ - $^{13}\text{C}$  HMBC NMR spectra recorded at 25 °C. Abbreviations used in  $^1\text{H}$  NMR assignment are as follows: Ar = aromatic, s = singlet, d = doublet, t = triplet, q = quartet, m = multiplet, br s = broad singlet, br d = broad doublet, dd = doublet of doublets, dt = doublet of triplets, dq = doublet of quartets, ddt = doublet of doublet of triplets, td = triplet of doublets, tt = triplet of triplets, ttd = triplet of triplet of doublets, qd = quartet of doublets. Although not stereospecifically assigned, in peptides containing Leu, the two  $\beta$ -methyl groups and their corresponding carbon shifts could be distinguished from each other, and the coupling pairs are denoted 'a' and 'b'. Data processing was carried out using ACD/NMR Processor Academic Edition, version 12.01 (Advanced Chemistry Development Inc.), CCPN Analysis version 2.4 and CCPN Chembuild.<sup>1</sup>

**Table S1.** Spectral parameters for 2D spectra.

| <b>Experiment</b>                   | <b>Sweep width in direct dimension (ppm)</b> | <b>Number of complex points (direct)</b> | <b>Sweep width in indirect dimension (ppm)</b> | <b>Number of complex points (indirect)</b> | <b>Name of pulse sequence</b> |
|-------------------------------------|----------------------------------------------|------------------------------------------|------------------------------------------------|--------------------------------------------|-------------------------------|
| COSY                                | 8.67                                         | 2048                                     | 8.67                                           | 2048                                       | cosygpmfqfvg3                 |
| TOCSY                               | 8.76                                         | 1024                                     | 8.76                                           | 1024                                       | mlevgp.agi                    |
| NOESY                               | 8.77                                         | 2048                                     | 8.77                                           | 2048                                       | noesygpshz                    |
| ROESY                               | 9.15                                         | 1024                                     | 9.15                                           | 1024                                       | roesyetgp                     |
| $^1\text{H}$ - $^{13}\text{C}$ HSQC | 8.67                                         | 1024                                     | 231.26                                         | 1024                                       | hsqcedetgpsisp2.4             |
| $^1\text{H}$ - $^{13}\text{C}$ HMBC | 8.66                                         | 2048                                     | 241.31                                         | 1024                                       | hmbcetgpl3nd                  |

## Ring B Peptides

### Mutacin I Ring B WT (1)

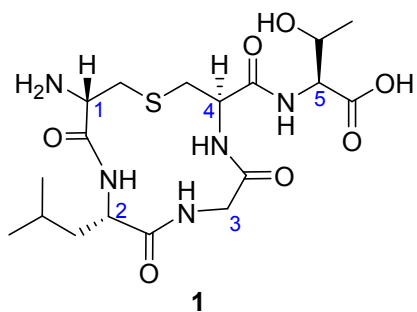

HRMS (ES+) m/z: [M + H]<sup>+</sup> Calcd for C<sub>18</sub>H<sub>31</sub>N<sub>5</sub>O<sub>7</sub>S 462.2022; found 462.2020.

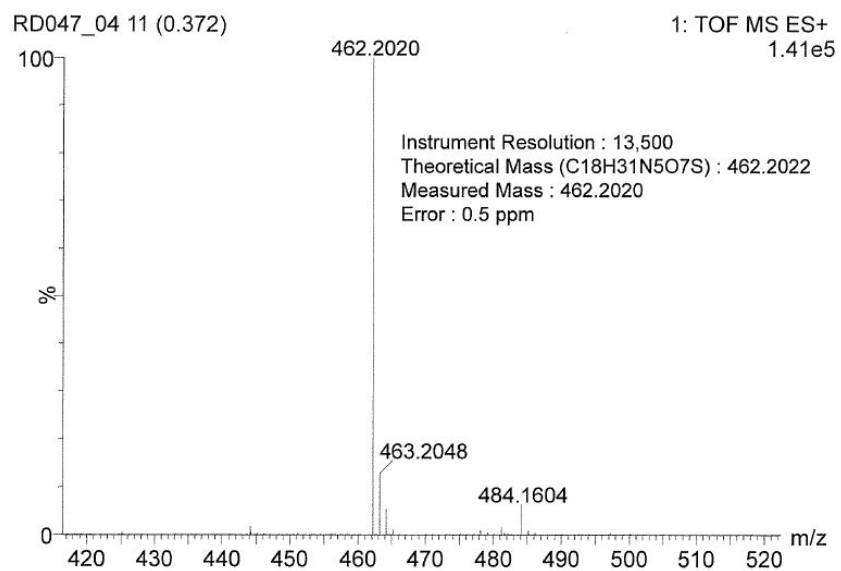

analytical HPLC (Fluka Analytical Discovery BIO C18-10 25 x 4.6 mm column on Dionex HPLC system) retention time 11.13 min.

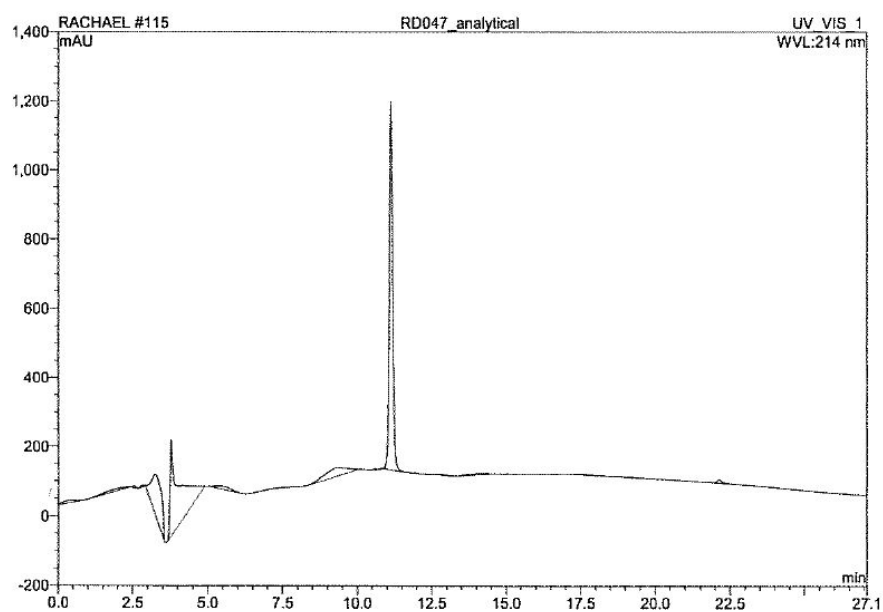

NMR  $\delta_H$  (600 MHz,  $(CD_3)_2SO$ ),  $\delta_C$  (150 MHz,  $(CD_3)_2SO$ )

Major Conformer

**Table S2**

| Residue Number | $^1H$ |          |         |          |          | Exchangeable           |
|----------------|-------|----------|---------|----------|----------|------------------------|
|                | NH    | $\alpha$ | $\beta$ | $\gamma$ | $\delta$ |                        |
| 1 - Lan (Dha)  |       | 3.90     | 2.87    |          |          | NH <sub>2</sub> – 8.33 |
|                |       |          | 3.05    |          |          |                        |
| 2 - Leu        | 8.20  | 4.14     | 1.58    | 1.58     | 0.86     |                        |
|                |       |          |         |          | 0.92     |                        |
| 3 - Gly        | 8.77  | 3.64     |         |          |          |                        |
|                |       | 3.73     |         |          |          |                        |
| 4 - Lan (Cys)  | 7.16  | 4.24     | 3.21    |          |          |                        |
|                |       |          | 2.81    |          |          |                        |
| 5 - Thr        | 8.02  | 4.14     | 4.14    | 1.03     |          | OH – 4.93              |

**Table S3**

| <sup>13</sup> C |        |       |       |       |                |
|-----------------|--------|-------|-------|-------|----------------|
| Residue Number  | CO     | α     | β     | γ     | δ              |
| 1 - Lan (Dha)   | 173.96 | 57.25 | 40.02 |       |                |
| 2 - Leu         | 175.23 | 56.11 | 41.68 | 27.37 | 25.31<br>25.73 |
| 3 - Gly         | 172.20 | 45.74 |       |       |                |
| 4 - Lan (Cys)   | 173.57 | 55.23 | 39.92 |       |                |
| 5 - Thr         |        | 60.75 | 69.36 | 23.57 |                |

Minor Conformer

**Table S4**

| <sup>1</sup> H |      |              |              |      |              |                        |
|----------------|------|--------------|--------------|------|--------------|------------------------|
| Residue Number | NH   | α            | β            | γ    | δ            | Exchangeable           |
| 1 - Lan (Dha)  |      | 4.63         | 2.58<br>3.17 |      |              | NH <sub>2</sub> - 8.00 |
| 2 - Leu        | 8.12 | 4.55         | 1.61         | 1.74 | 0.91<br>0.95 |                        |
| 3 - Gly        | 8.34 | 3.50<br>3.78 |              |      |              |                        |
| 4 - Lan (Cys)  | 7.18 | 4.41         | 2.30<br>3.29 |      |              |                        |
| 5 - Thr        | 7.88 | 4.19         | 4.16         | 1.06 |              |                        |

**Table S5**

| <sup>13</sup> C |        |       |       |       |                |
|-----------------|--------|-------|-------|-------|----------------|
| Residue Number  | CO     | α     | β     | γ     | δ              |
| 1 - Lan (Dha)   |        | 59.28 | 32.91 |       |                |
| 2 - Leu         | 176.63 | 56.47 | 43.24 | 27.46 | 23.80<br>26.81 |
| 3 - Gly         | 173.21 | 46.40 |       |       |                |
| 4 - Lan (Cys)   |        | 54.02 | 34.38 |       |                |
| 5 - Thr         |        | 60.74 | 70.47 | 23.57 |                |



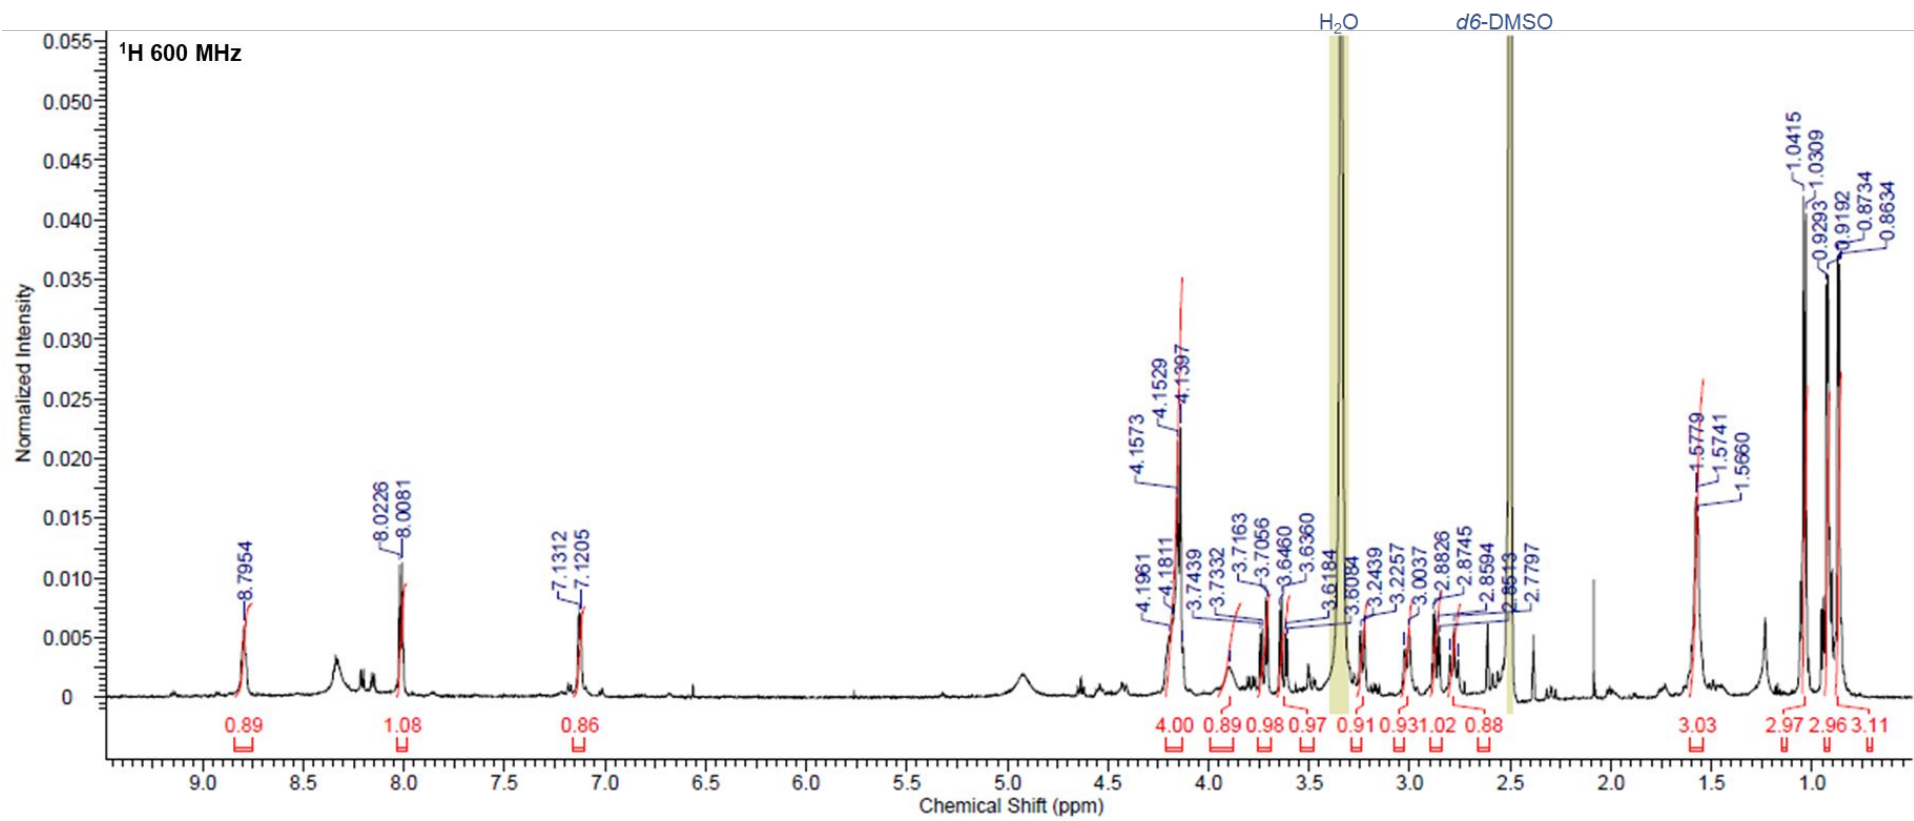

Annotation is for major conformer.

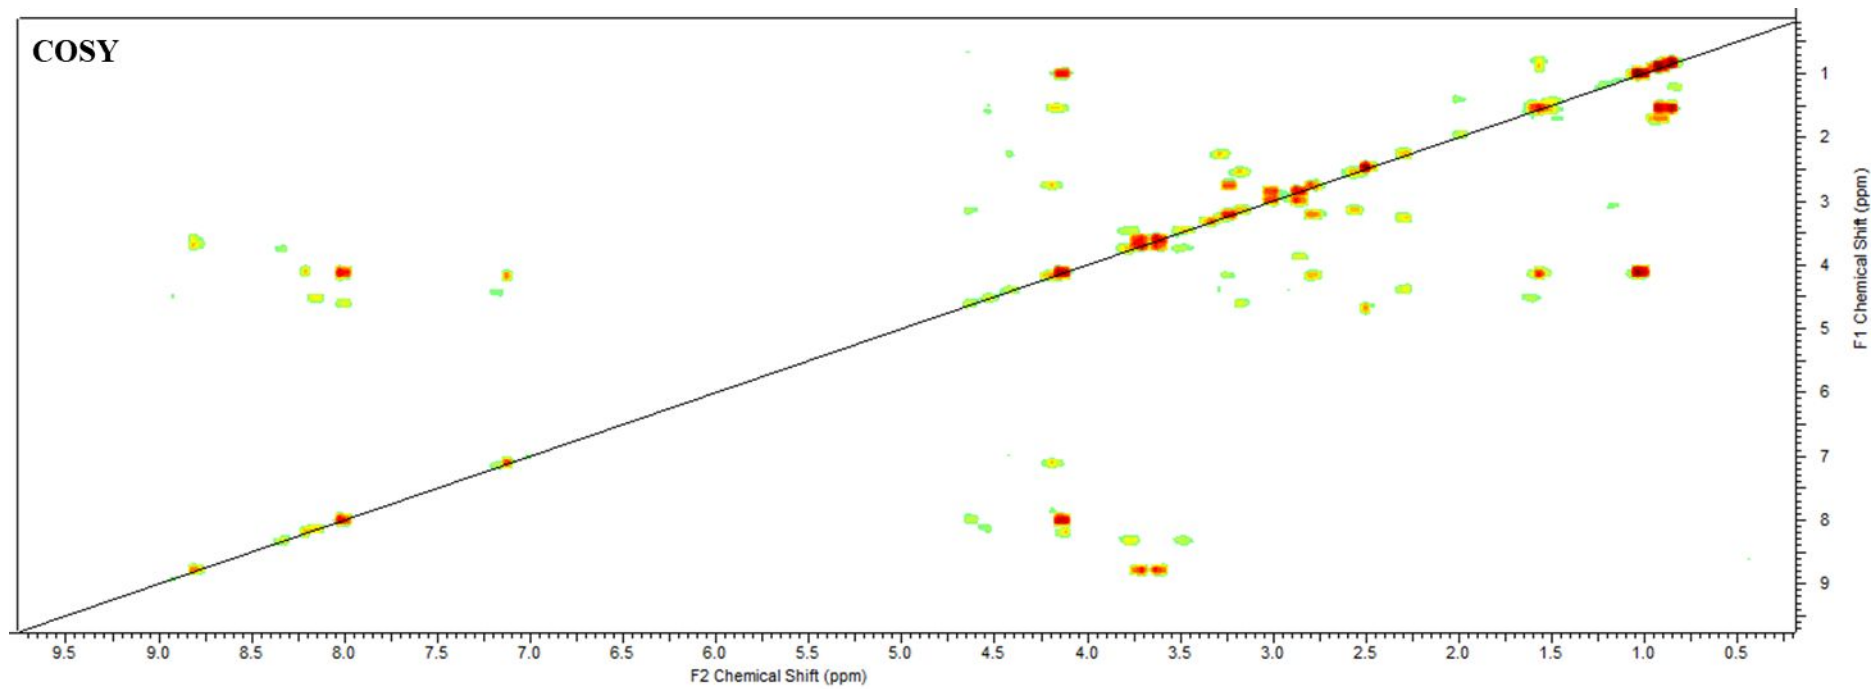

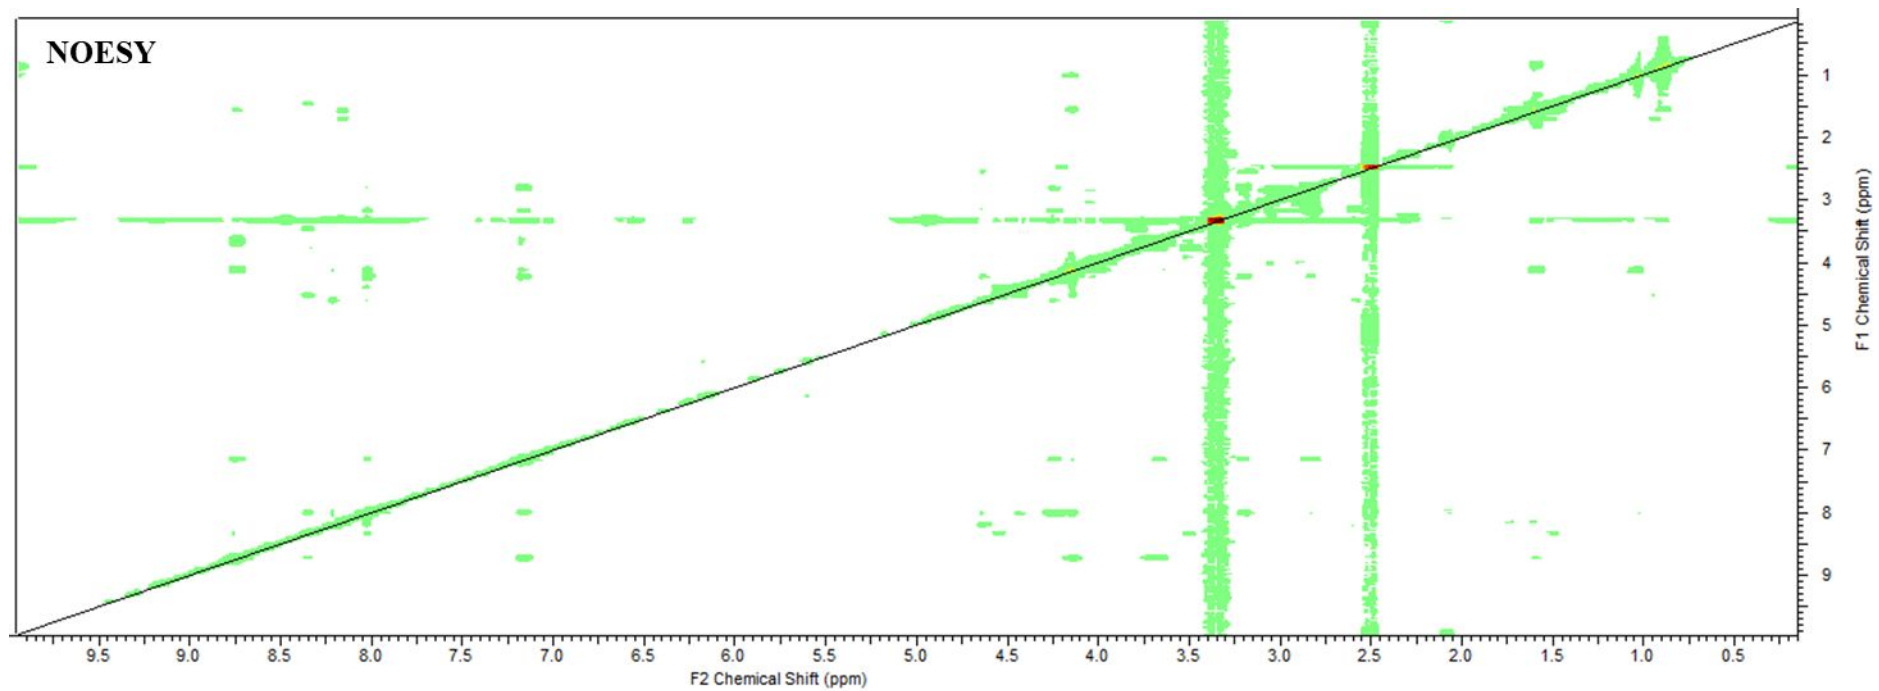

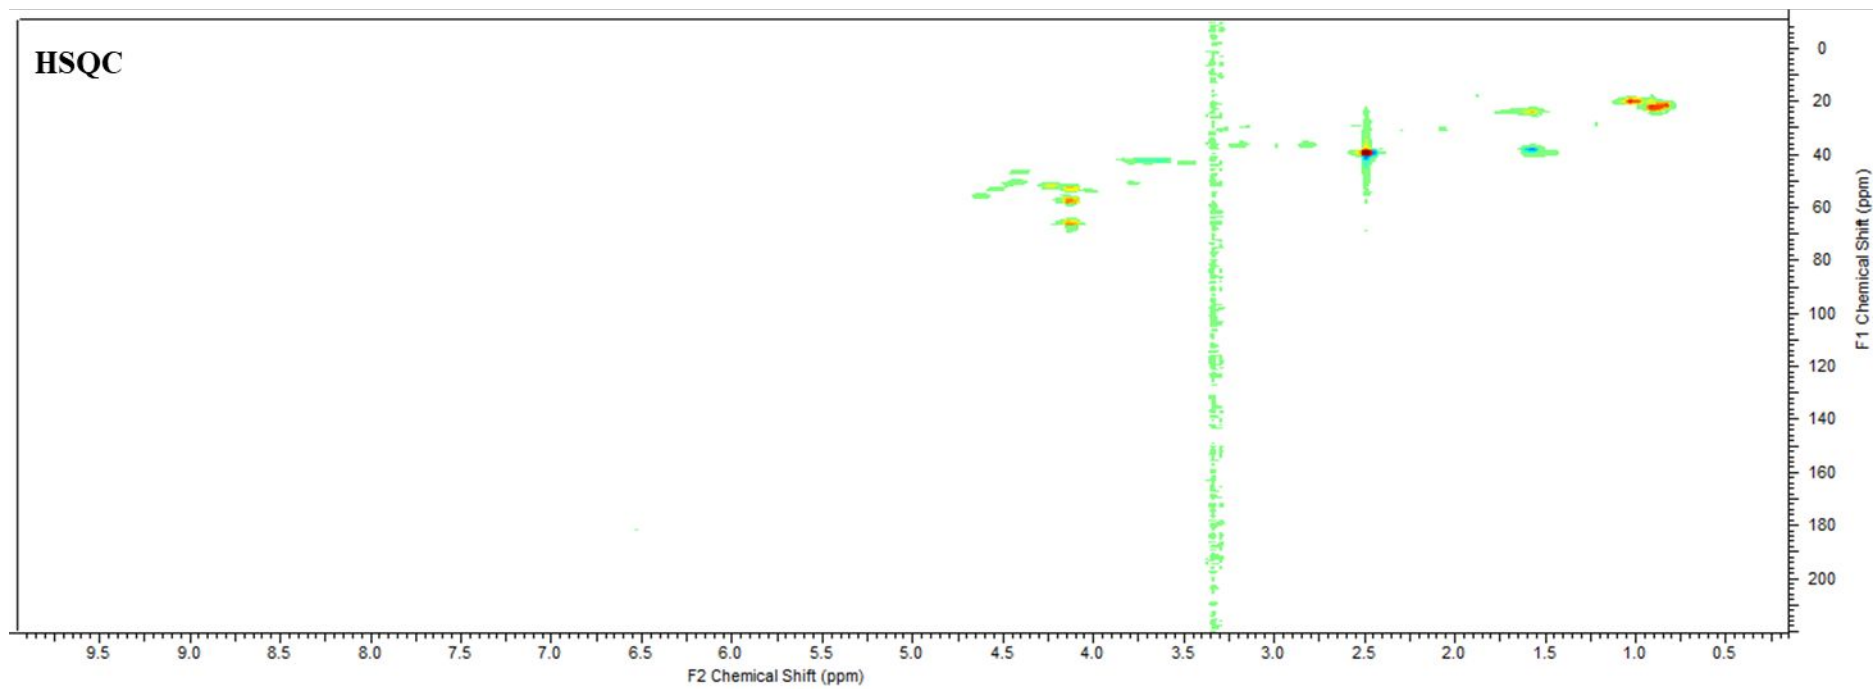

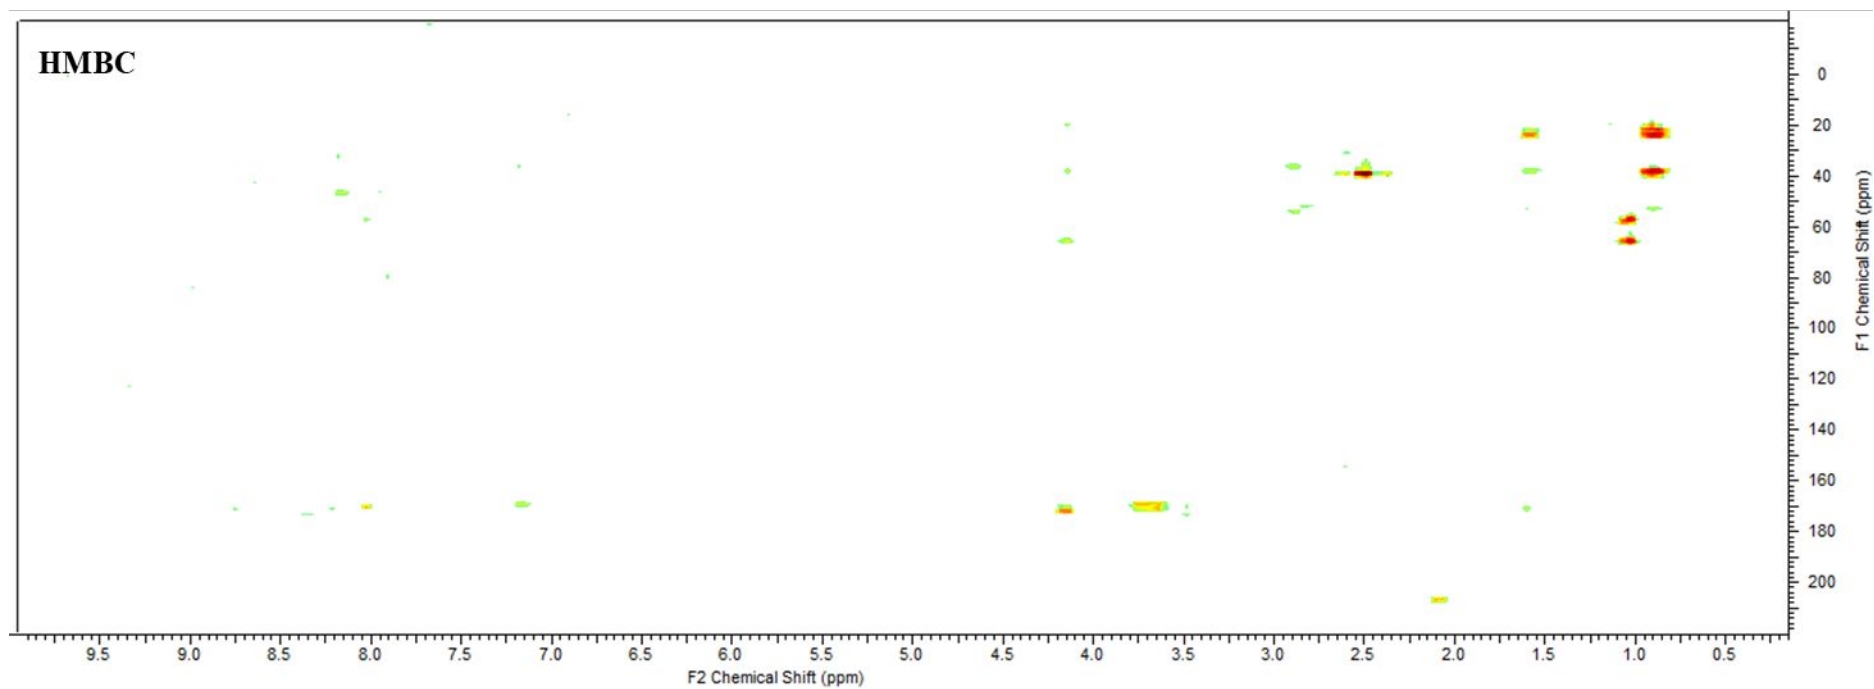

### Nisin Ring B Lan analogue (3)

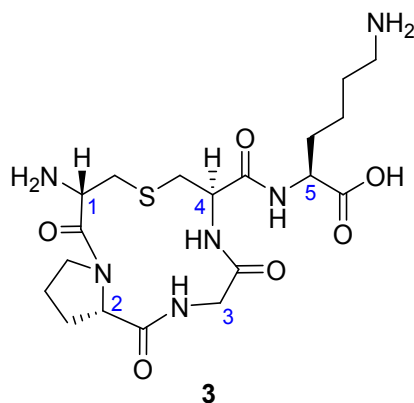

$m/z$  (HRMS, ES<sup>+</sup>) required for [C<sub>19</sub>H<sub>33</sub>N<sub>6</sub>O<sub>6</sub>S]<sup>+</sup> 473.2182, found [C<sub>19</sub>H<sub>33</sub>N<sub>6</sub>O<sub>6</sub>S]<sup>+</sup> 473.2173.

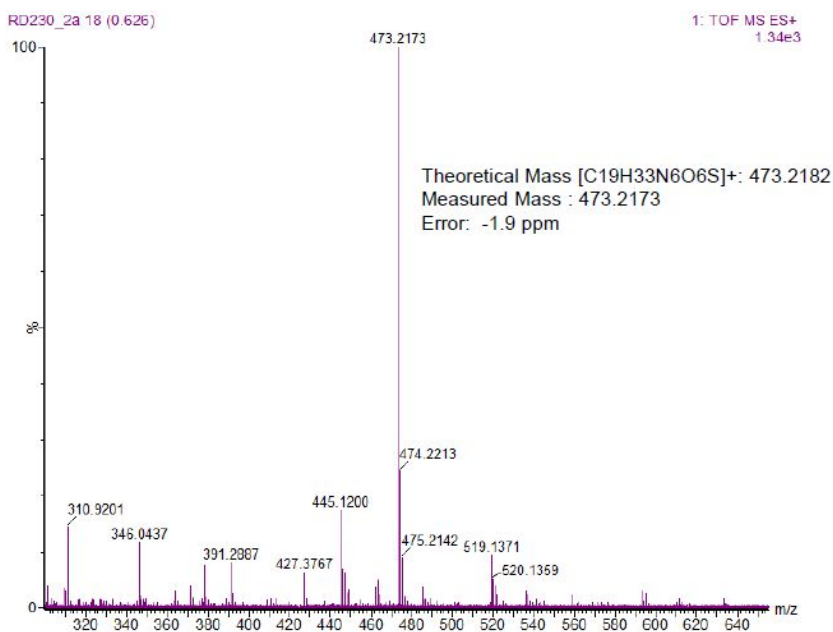

*analytical HPLC* (Dr Maisch GmbH Reprosil Gold 200 C8 5 $\mu$ m 250 x 4.6 mm column on Agilent HPLC system) retention time 6.04 min.

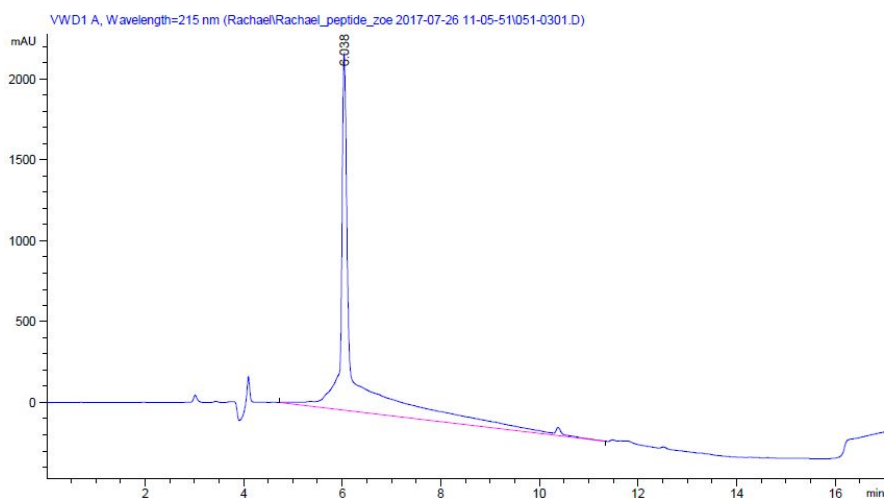

NMR  $\delta_{\text{H}}$  (600 MHz,  $(\text{CD}_3)_2\text{SO}$ ),  $\delta_{\text{C}}$  (150 MHz,  $(\text{CD}_3)_2\text{SO}$ )

**Table S6**

| <b><math>^1\text{H}</math></b> |           |                            |                           |                            |                            |                              |                                                     |
|--------------------------------|-----------|----------------------------|---------------------------|----------------------------|----------------------------|------------------------------|-----------------------------------------------------|
| <b>Residue Number</b>          | <b>NH</b> | <b><math>\alpha</math></b> | <b><math>\beta</math></b> | <b><math>\gamma</math></b> | <b><math>\delta</math></b> | <b><math>\epsilon</math></b> | <b>Exchangeable</b>                                 |
| <b>1 - Lan (Dha)</b>           |           | 4.45                       | 2.28<br>3.32              |                            |                            |                              | NH <sub>2</sub> - 8.23                              |
| <b>2 - Pro</b>                 |           | 4.89                       | 2.04<br>2.28              | 1.71<br>1.82               | 3.42<br>3.50               |                              |                                                     |
| <b>3 - Gly</b>                 | 8.58      | 3.54<br>3.72               |                           |                            |                            |                              |                                                     |
| <b>4 - Lan (Cys)</b>           | 8.12      | 4.44                       | 2.52<br>3.18              |                            |                            |                              |                                                     |
| <b>5 - Lys</b>                 | 8.47      | 4.09                       | 1.57<br>1.73              | 1.35                       | 1.52                       | 2.77                         | NH <sub>2</sub> - 7.63<br>CO <sub>2</sub> H - 12.66 |

**Table S7**

| <b><math>^{13}\text{C}</math></b> |           |                            |                           |                            |                            |                              |
|-----------------------------------|-----------|----------------------------|---------------------------|----------------------------|----------------------------|------------------------------|
| <b>Residue Number</b>             | <b>CO</b> | <b><math>\alpha</math></b> | <b><math>\beta</math></b> | <b><math>\gamma</math></b> | <b><math>\delta</math></b> | <b><math>\epsilon</math></b> |
| <b>1 - Lan (Dha)</b>              | 174.63    | 52.19                      |                           |                            |                            |                              |
| <b>2 - Pro</b>                    | 175.24    | 62.15                      | 34.96                     | 25.21                      | 50.56                      |                              |
| <b>3 - Gly</b>                    | 172.98    | 46.76                      |                           |                            |                            |                              |
| <b>4 - Lan (Cys)</b>              | 173.85    | 59.65                      | 32.68                     |                            |                            |                              |
| <b>5 - Lys</b>                    | 176.70    | 55.21                      | 33.55                     | 25.75                      | 29.85                      | 41.88                        |

H<sub>2</sub>O d<sub>6</sub>-DMSO

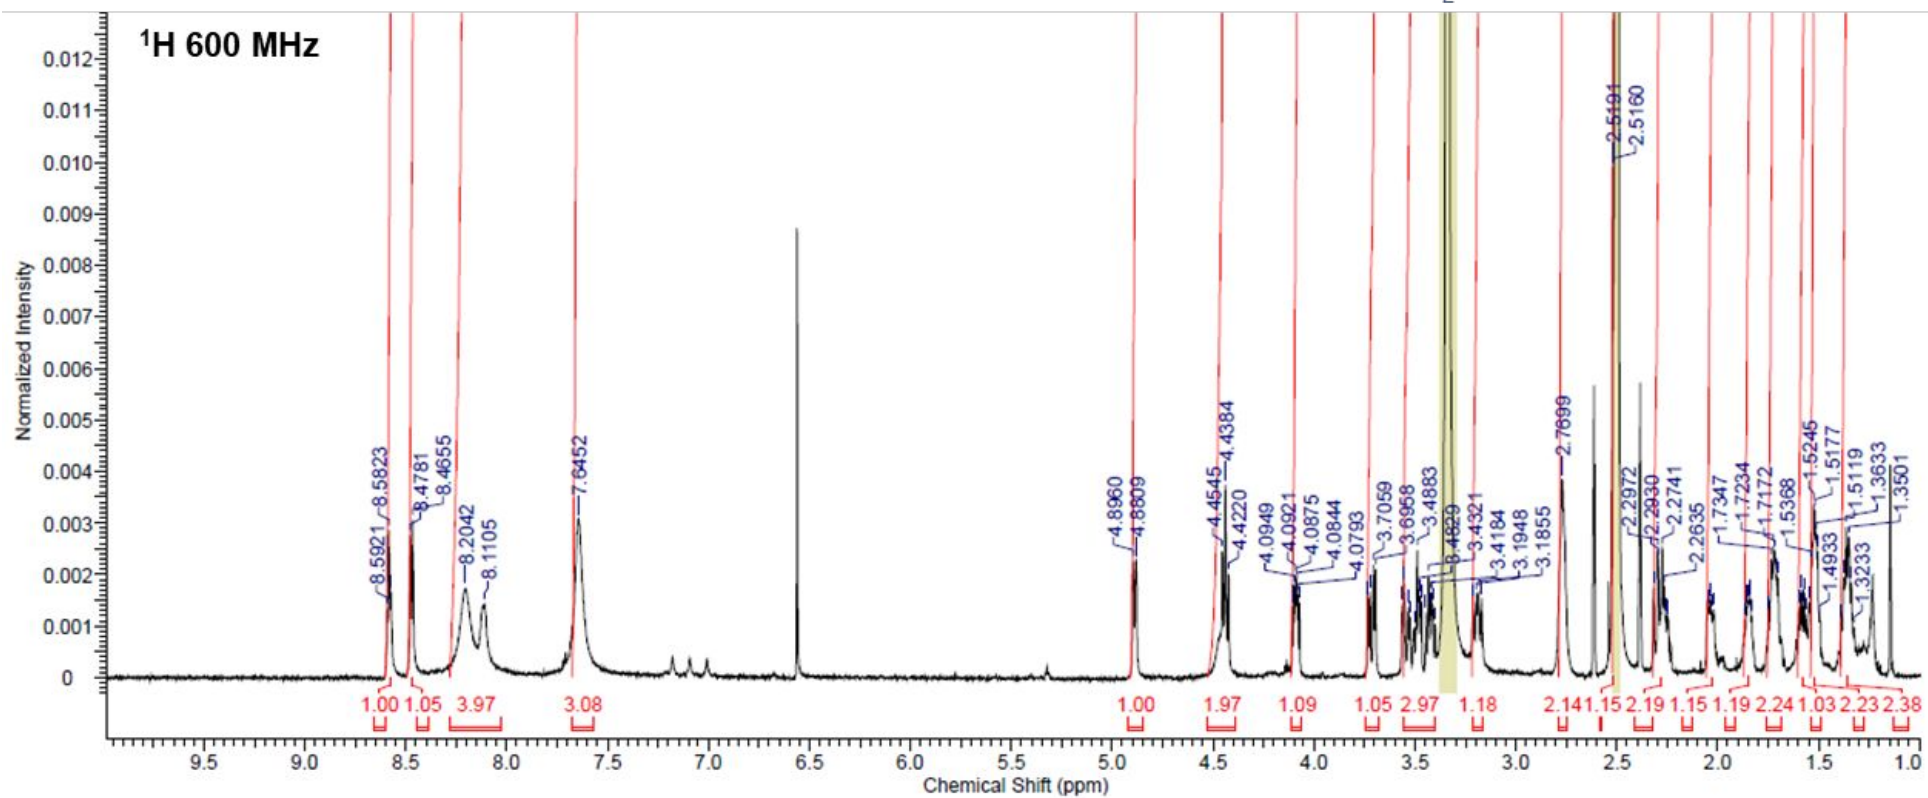



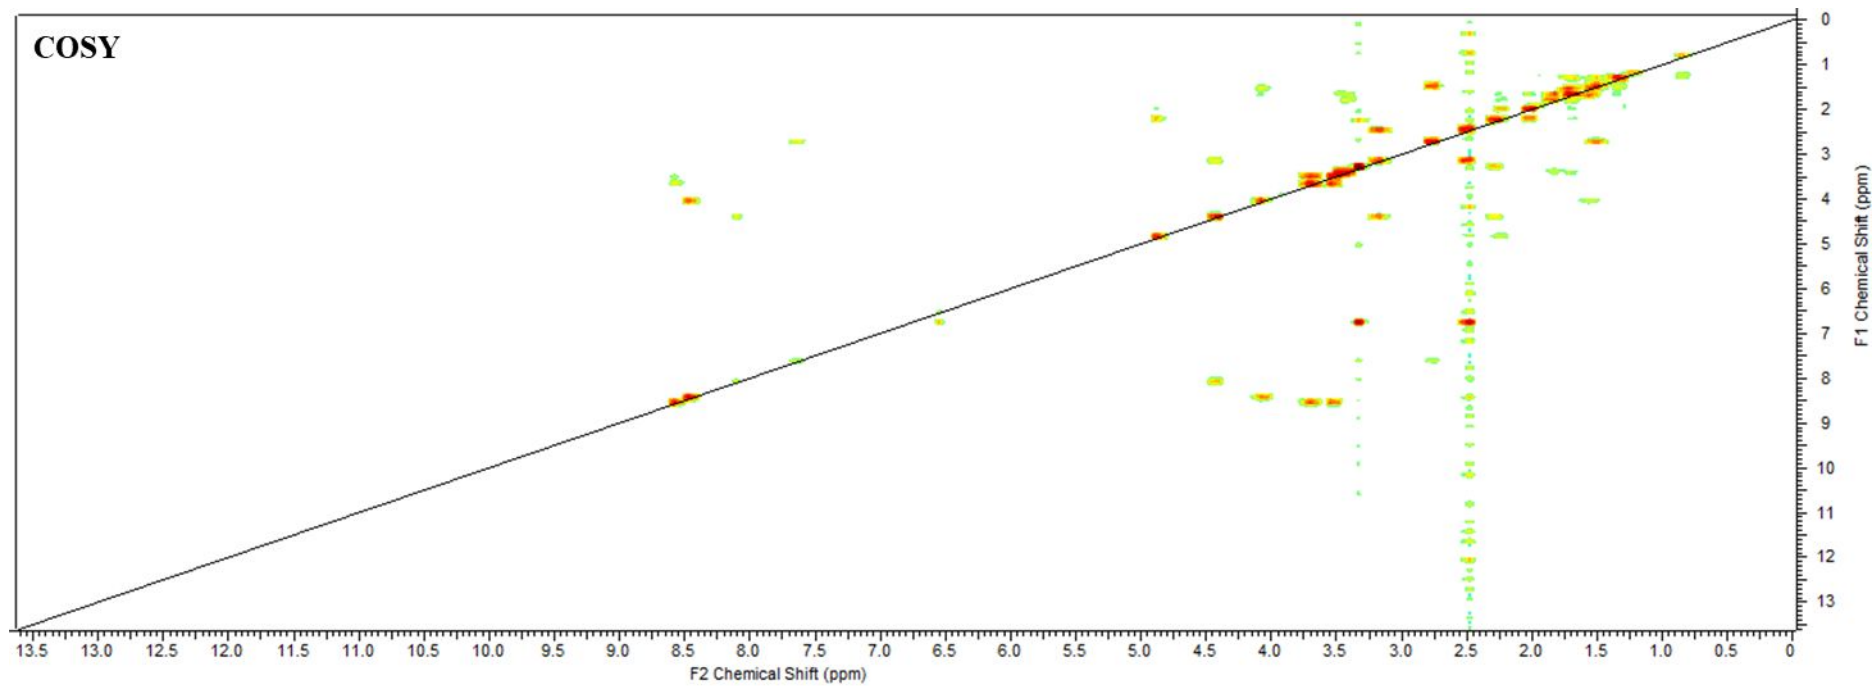

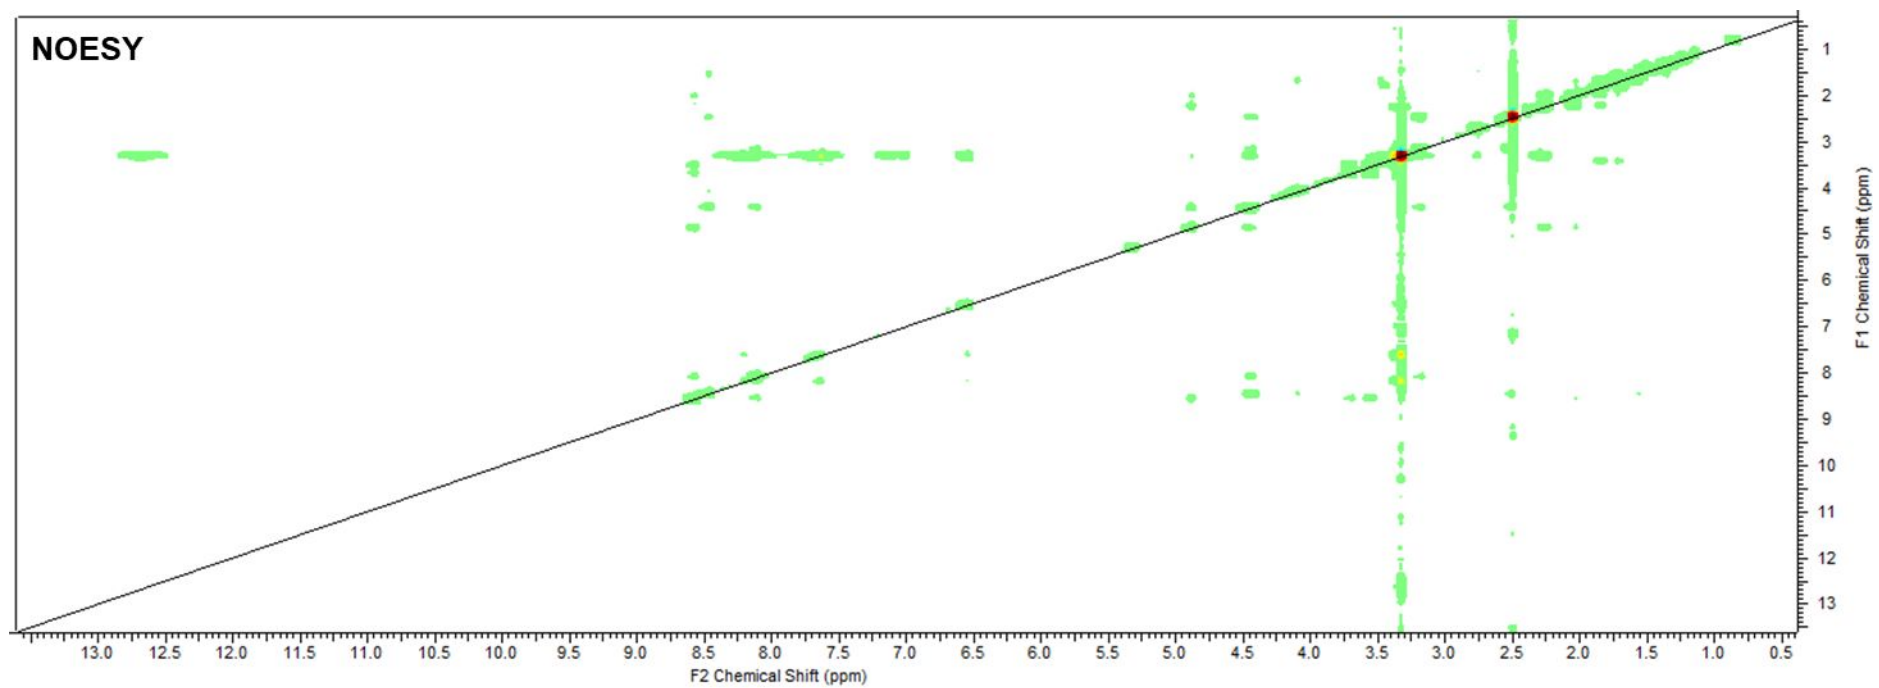

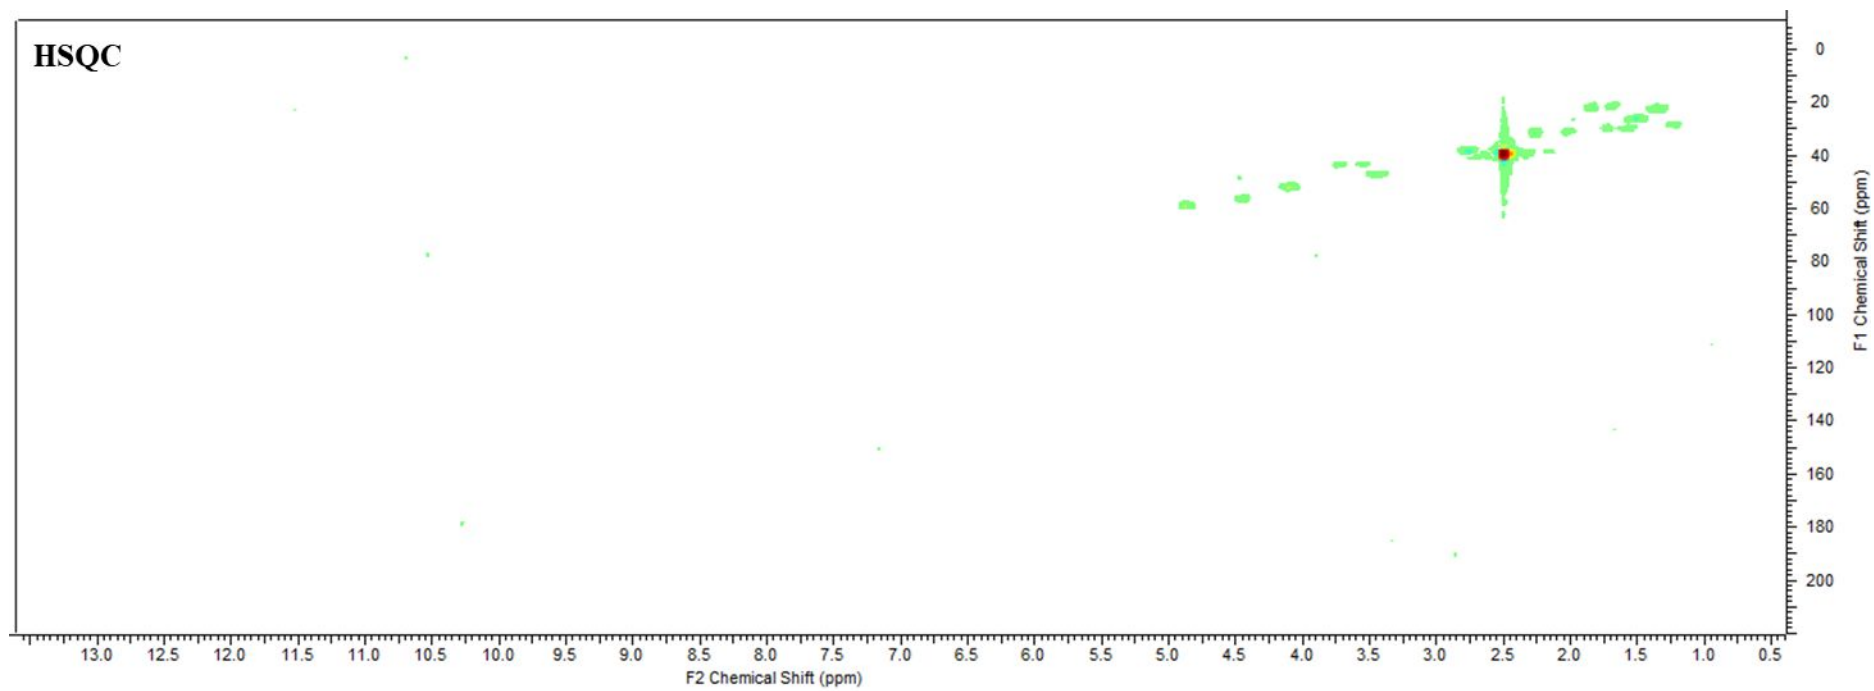

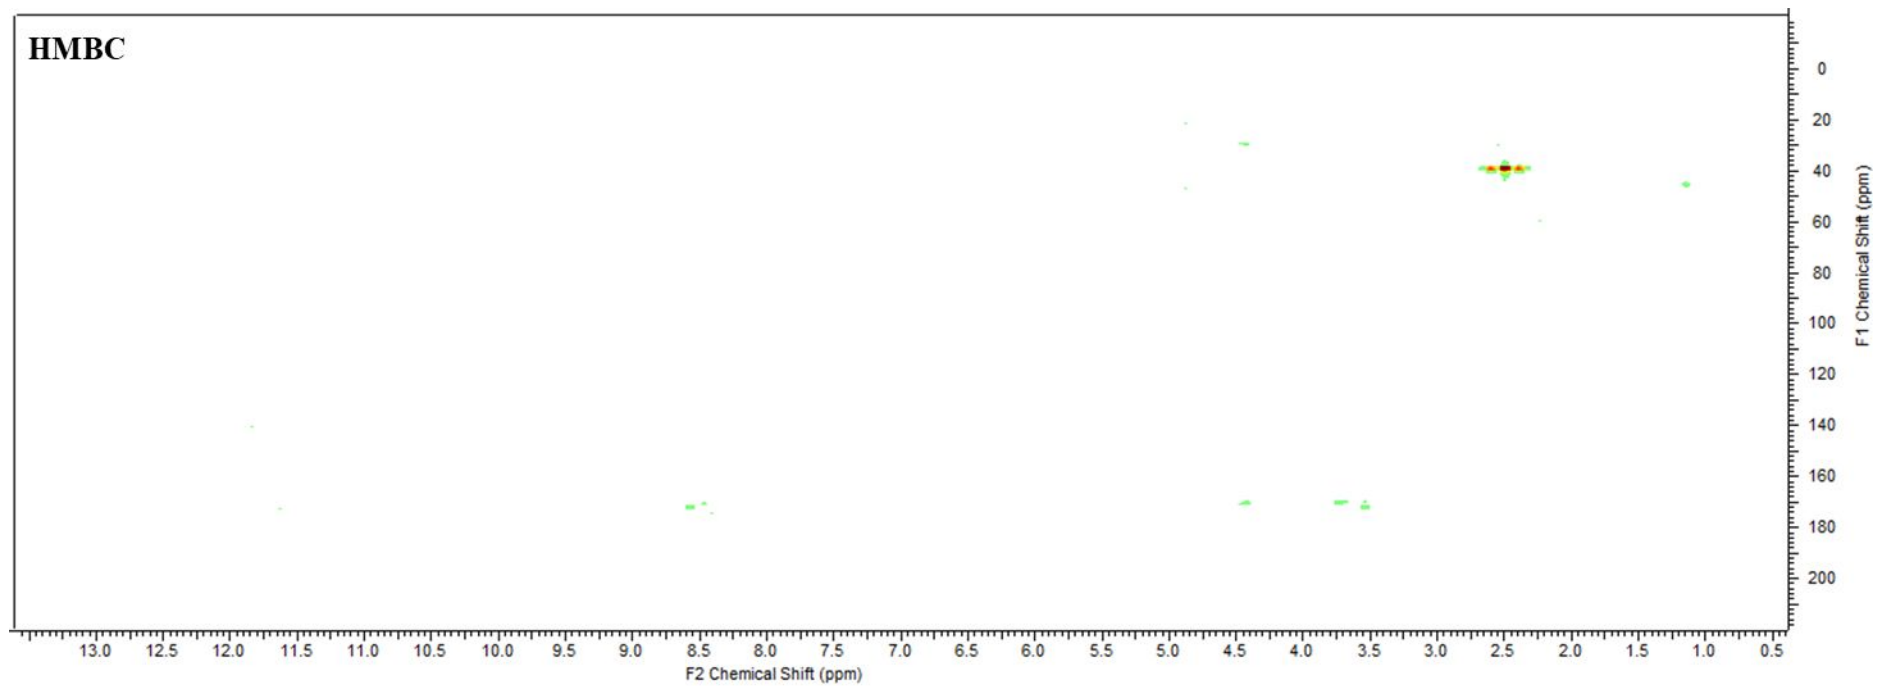

## Nisin Ring B WT (2)

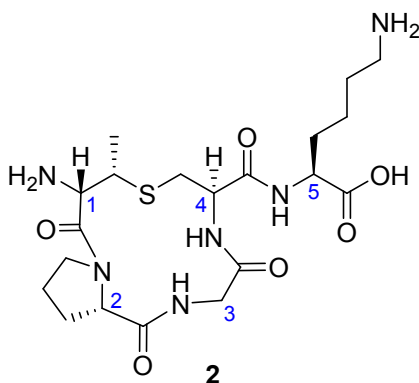

$m/z$  (HRMS, ES+) required for  $[\text{C}_{20}\text{H}_{34}\text{N}_6\text{O}_6\text{S}+\text{H}]^+$  487.2339, found  $[\text{C}_{20}\text{H}_{34}\text{N}_6\text{O}_6\text{S}+\text{H}]^+$  487.2339.

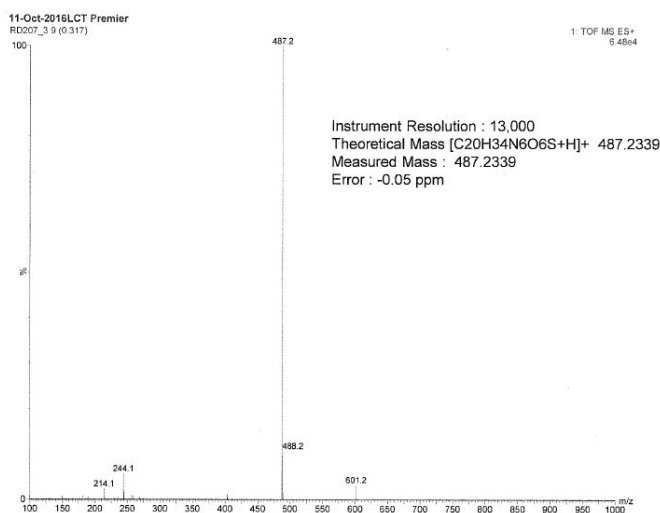

*analytical HPLC* (Dr Maisch GmbH Repronil Gold 200 C8 5 $\mu\text{m}$  250 x 4.6 mm column on Dionex HPLC system) retention time 11.98 min.

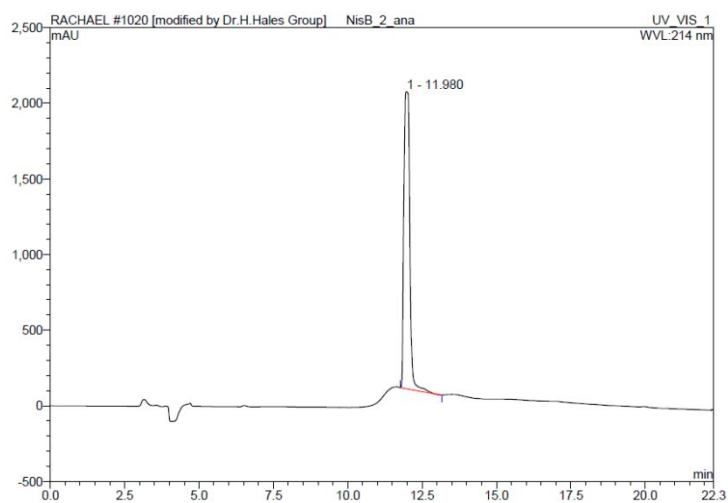

NMR  $\delta_{\text{H}}$  (600 MHz,  $(\text{CD}_3)_2\text{SO}$ ),  $\delta_{\text{C}}$  (150 MHz,  $(\text{CD}_3)_2\text{SO}$ )

**Table S8**

|                        |           | $^1\text{H}$               |                           |                            |                            |                              |                                                     |
|------------------------|-----------|----------------------------|---------------------------|----------------------------|----------------------------|------------------------------|-----------------------------------------------------|
| <b>Residue Number</b>  | <b>NH</b> | <b><math>\alpha</math></b> | <b><math>\beta</math></b> | <b><math>\gamma</math></b> | <b><math>\delta</math></b> | <b><math>\epsilon</math></b> | <b>Exchangeable</b>                                 |
| <b>1 - MeLan (Dhb)</b> |           | 3.76                       | 3.05                      | 1.11                       |                            |                              | NH <sub>2</sub> - 8.26                              |
| <b>2 - Pro</b>         |           | 4.66                       | 1.97<br>2.22              | 1.87                       | 3.48                       |                              |                                                     |
| <b>3 - Gly</b>         | 8.63      | 3.60<br>3.83               |                           |                            |                            |                              |                                                     |
| <b>4 - MeLan (Cys)</b> | 7.81      | 4.43                       | 2.98<br>2.93              |                            |                            |                              |                                                     |
| <b>5 - Lys</b>         | 8.65      | 4.22                       | 1.74<br>1.59              | 1.34                       | 1.52                       | 2.77                         | NH <sub>2</sub> - 7.64<br>CO <sub>2</sub> H - 12.73 |

**Table S9**

|                        |           | $^{13}\text{C}$            |                           |                            |                            |                              |
|------------------------|-----------|----------------------------|---------------------------|----------------------------|----------------------------|------------------------------|
| <b>Residue Number</b>  | <b>CO</b> | <b><math>\alpha</math></b> | <b><math>\beta</math></b> | <b><math>\gamma</math></b> | <b><math>\delta</math></b> | <b><math>\epsilon</math></b> |
| <b>1 - MeLan (Dhb)</b> | 172.18    | 57.41                      | 43.80                     | 20.91                      |                            |                              |
| <b>2 - Pro</b>         | 175.14    | 62.87                      | 34.72                     | 25.61                      | 50.70                      |                              |
| <b>3 - Gly</b>         | 173.34    | 46.65                      |                           |                            |                            |                              |
| <b>4 - MeLan (Cys)</b> | 173.41    | 56.62                      | 34.42                     |                            |                            |                              |
| <b>5 - Lys</b>         | 176.04    | 54.97                      | 33.73                     | 25.68                      | 29.84                      | 41.78                        |

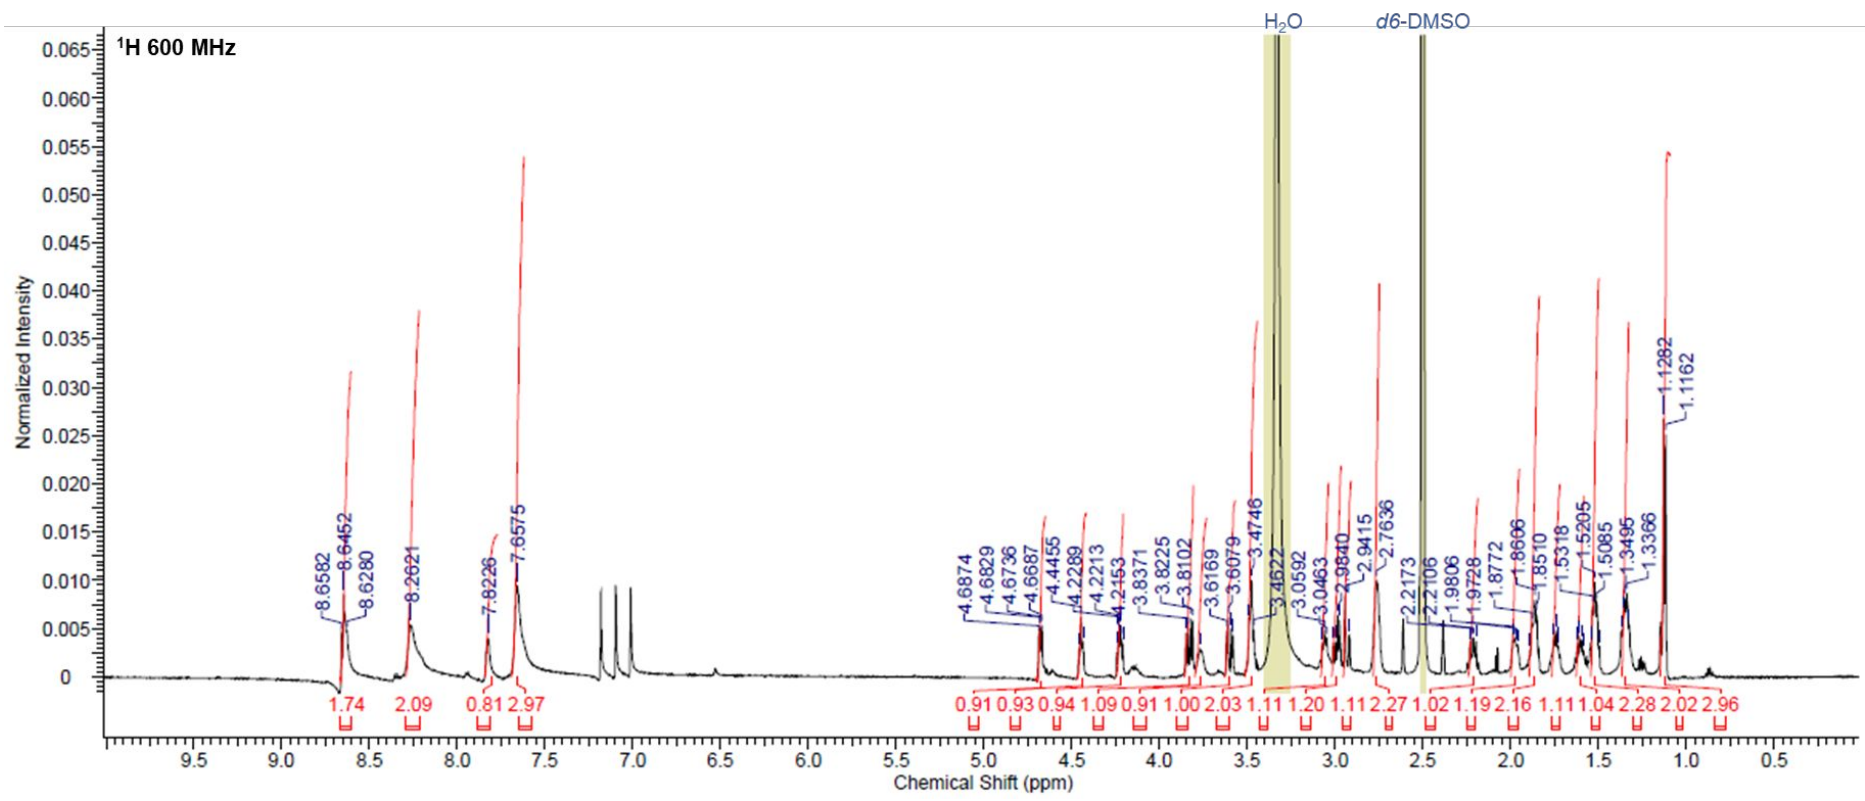

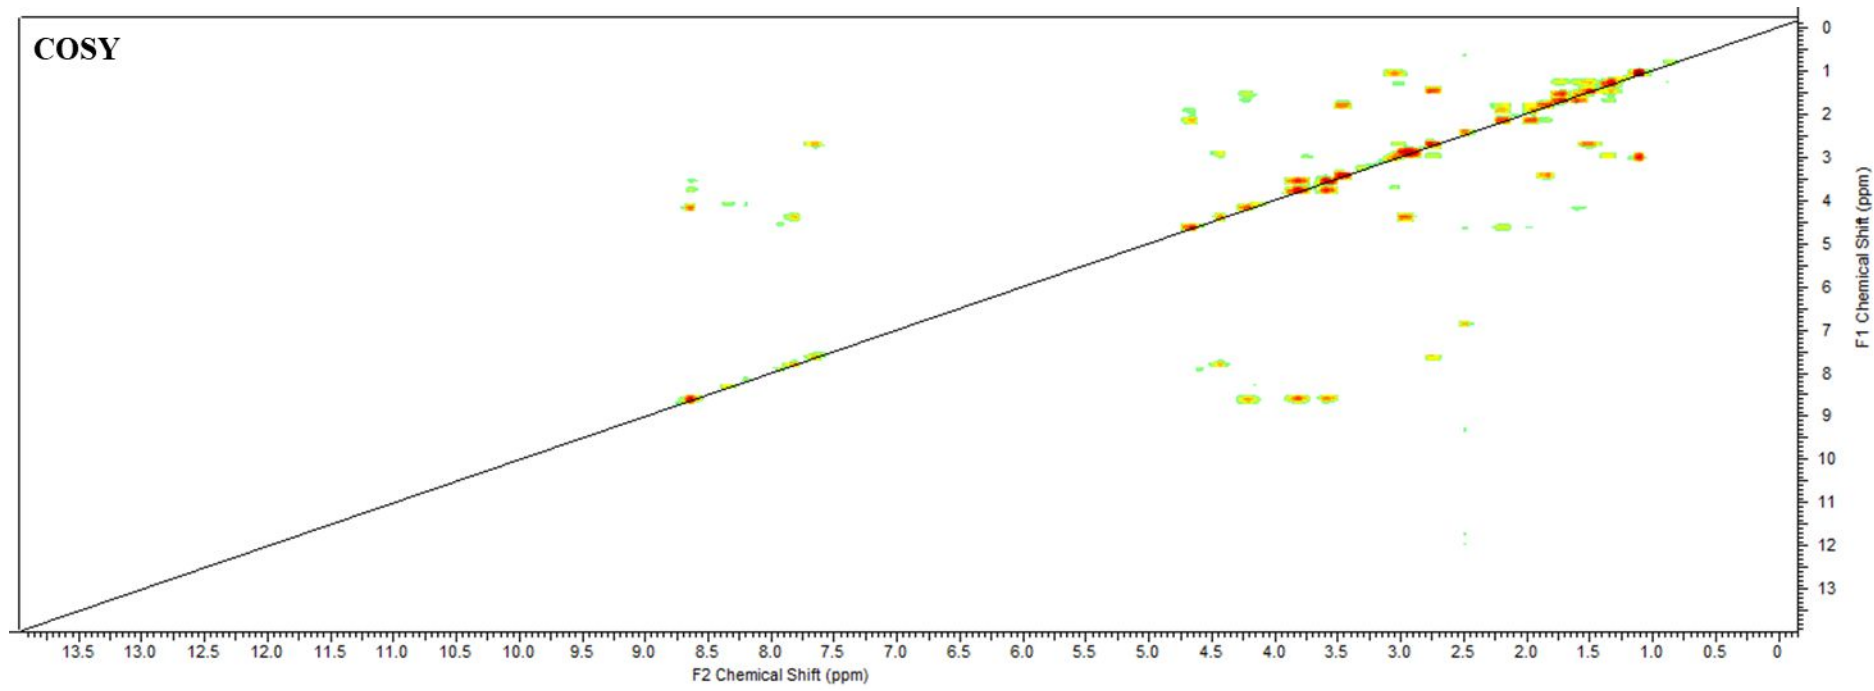



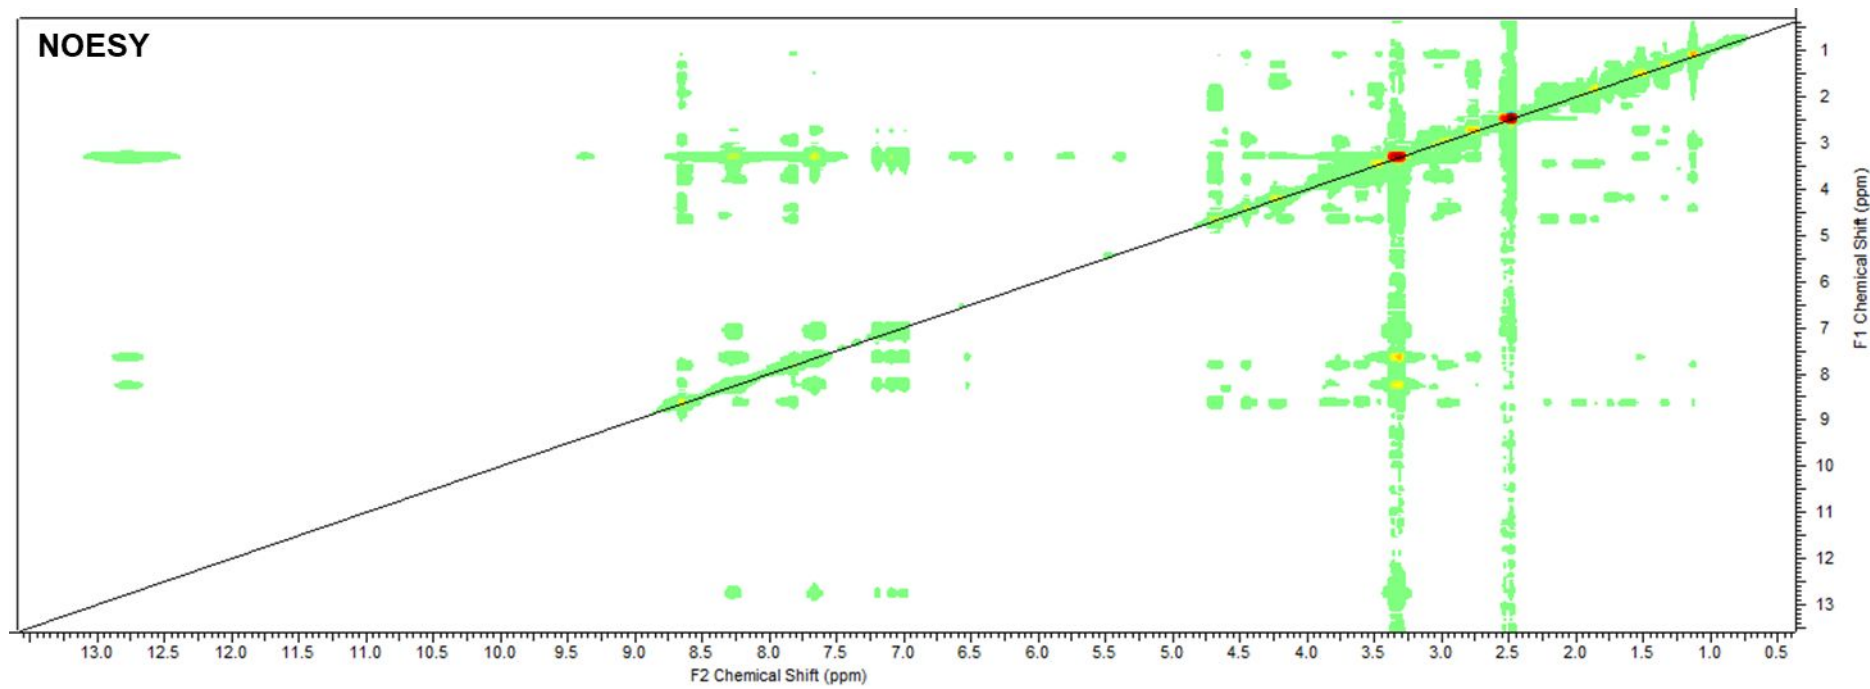

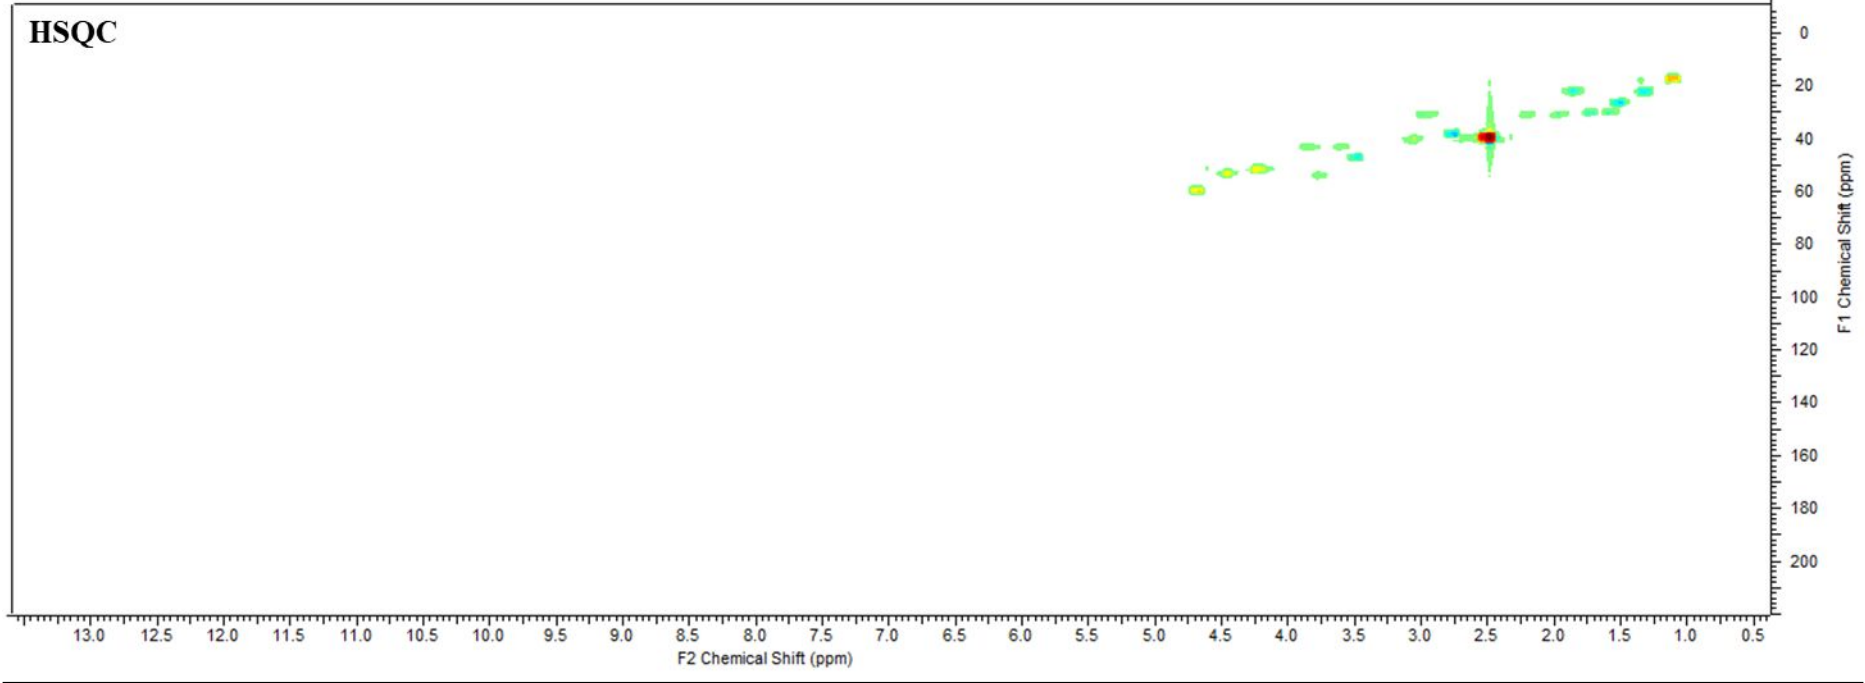

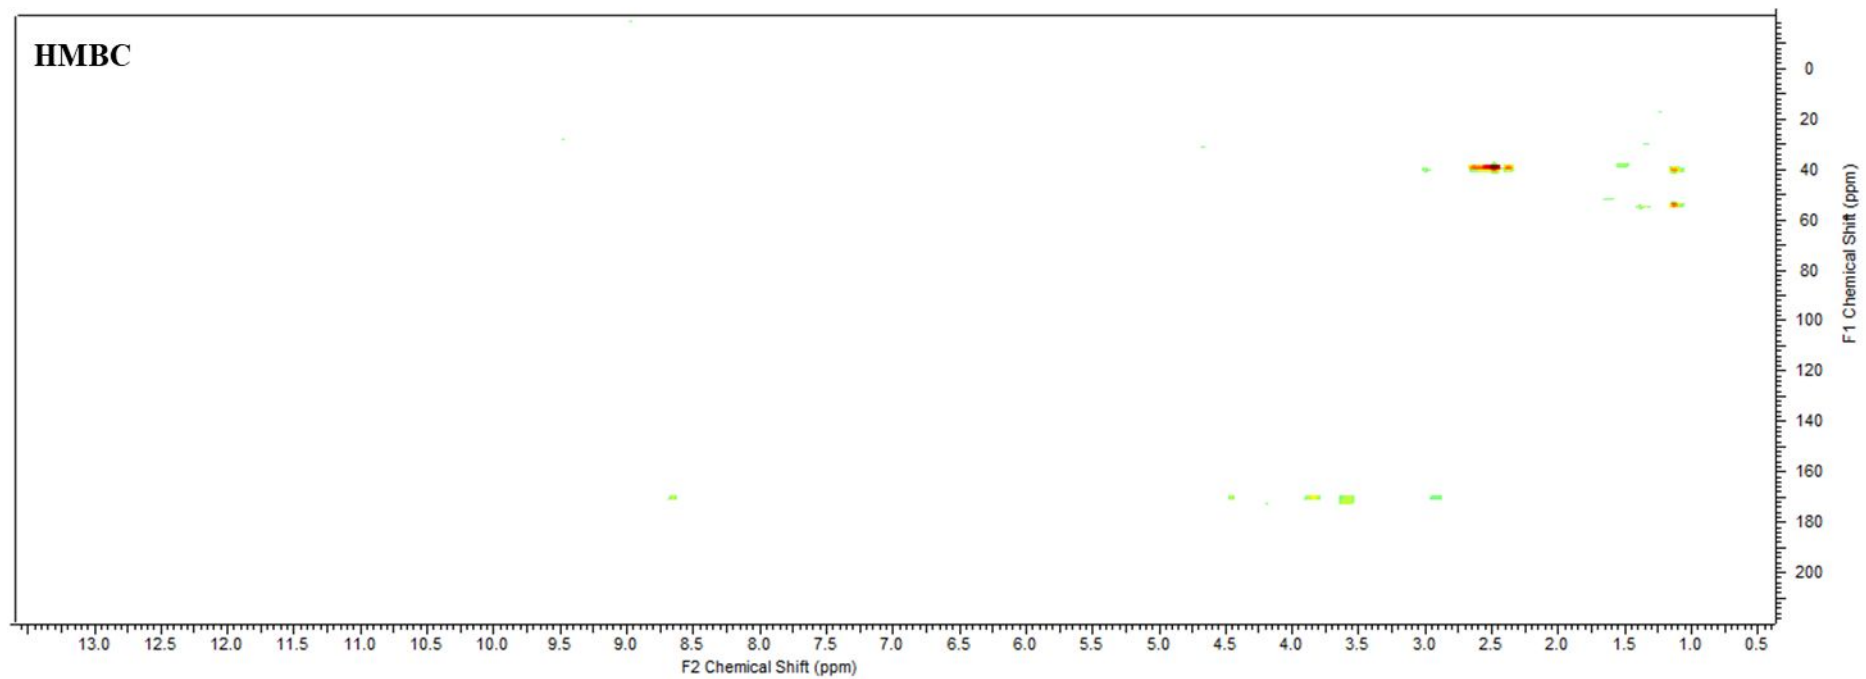

## Ring A Peptides

### Mutacin I Ring A Ser/Ala Analogue (14)

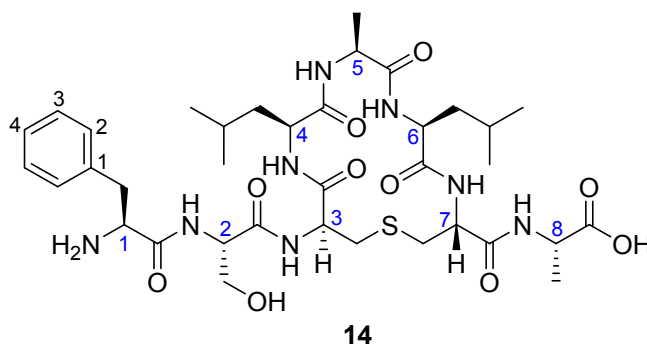

HRMS (ES+)  $m/z$ :  $[M + H]^+$  Calcd for  $C_{36}H_{57}N_8O_{10}S$  793.3918; found 793.3928.

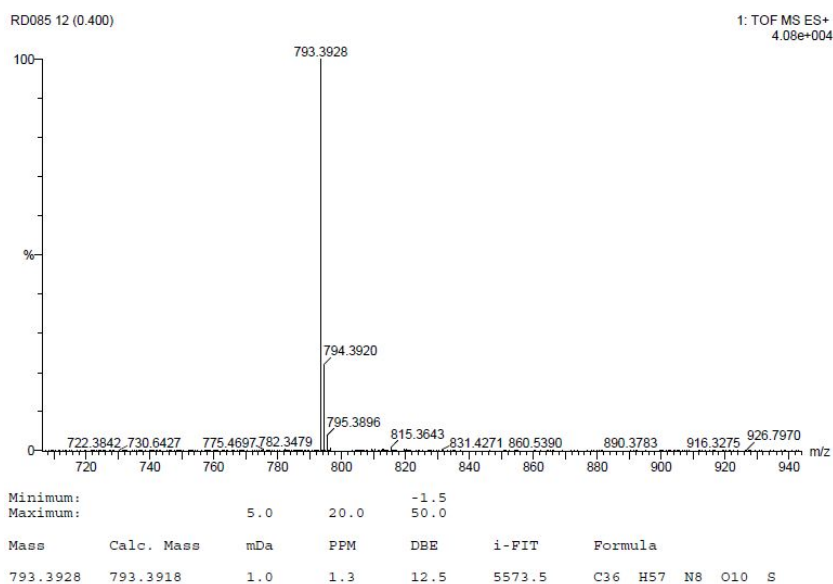

*analytical HPLC* (ACE 300Å C18-300 150 x 4.6 mm column on Agilent HPLC system)  
retention time 8.07 min.

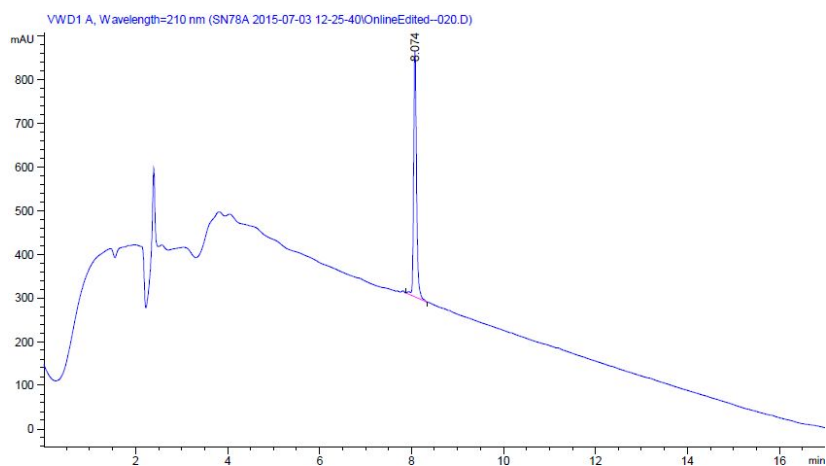

NMR  $\delta_{\text{H}}$  (600 MHz,  $(\text{CD}_3)_2\text{SO}$ ),  $\delta_{\text{C}}$  (150 MHz,  $(\text{CD}_3)_2\text{SO}$ )

**Table S10**

| Residue Number | $^1\text{H}$ |          |              |          |                      |                                  | Exchangeable              |
|----------------|--------------|----------|--------------|----------|----------------------|----------------------------------|---------------------------|
|                | NH           | $\alpha$ | $\beta$      | $\gamma$ | $\delta$             | Ar                               |                           |
| 1 - Phe        |              | 4.13     | 2.88<br>3.12 |          |                      | 2 - 7.32<br>3 - 7.29<br>4 - 7.26 | NH <sub>2</sub> - 8.09    |
| 2 - Ser        | 8.85         | 4.48     | 3.62         |          |                      |                                  |                           |
| 3 - Lan (Dha)  | 8.33         | 4.39     | 2.92<br>2.83 |          |                      |                                  |                           |
| 4 - Leu        | 8.34         | 3.93     | 1.49<br>1.74 | 1.54     | a - 0.80<br>b - 0.83 |                                  |                           |
| 5 - Ala        | 7.94         | 4.15     | 1.27         |          |                      |                                  |                           |
| 6 - Leu        | 8.00         | 4.05     | 1.60<br>1.69 | 1.57     | a - 0.85<br>b - 0.90 |                                  |                           |
| 7 - Lan (Cys)  | 7.78         | 4.47     | 2.79<br>2.92 |          |                      |                                  |                           |
| 8 - Ala        | 7.93         | 4.07     | 1.30         |          |                      |                                  | CO <sub>2</sub> H - 12.63 |

**Table S11**

| Residue Number | $^{13}\text{C}$ |          |         |          |                        |                                                      |
|----------------|-----------------|----------|---------|----------|------------------------|------------------------------------------------------|
|                | CO              | $\alpha$ | $\beta$ | $\gamma$ | $\delta$               | Ar                                                   |
| 1 - Phe        | 171.34          | 56.36    | 40.04   |          |                        | 1 - 138.00<br>2 - 131.83<br>3 - 132.67<br>4 - 130.43 |
| 2 - Ser        | 171.88          | 57.64    | 64.83   |          |                        |                                                      |
| 3 - Lan (Dha)  | 173.03          | 56.58    | 40.51   |          |                        |                                                      |
| 4 - Leu        | 174.50          | 55.77    | 25.77   | 41.71    | a - 24.71<br>b - 26.39 |                                                      |
| 5 - Ala        | 177.01          | 50.79    | 20.14   |          |                        |                                                      |
| 6 - Leu        | 170.11          | 54.33    | 27.54   | 42.12    | a - 24.76<br>b - 26.34 |                                                      |
| 7 - Lan (Cys)  | 174.34          | 56.07    | 37.60   |          |                        |                                                      |
| 8 - Ala        | 175.24          | 54.33    | 20.61   |          |                        |                                                      |

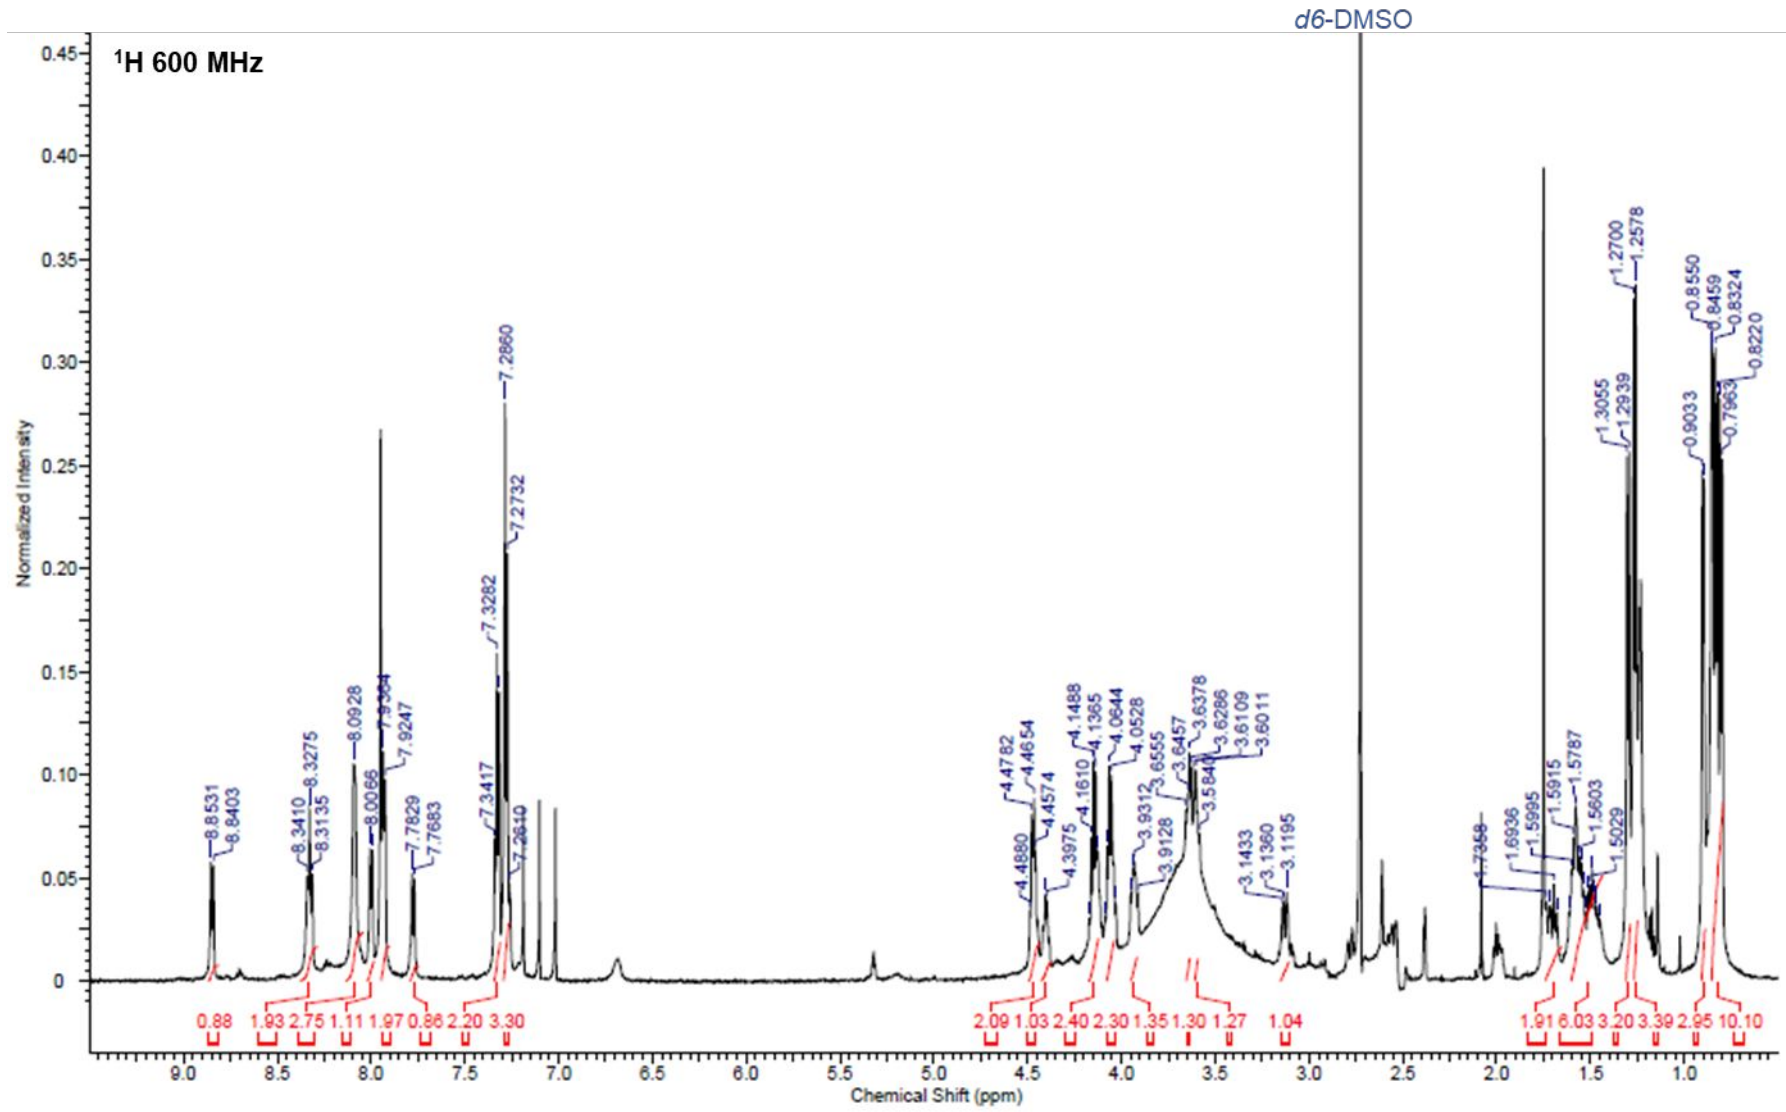

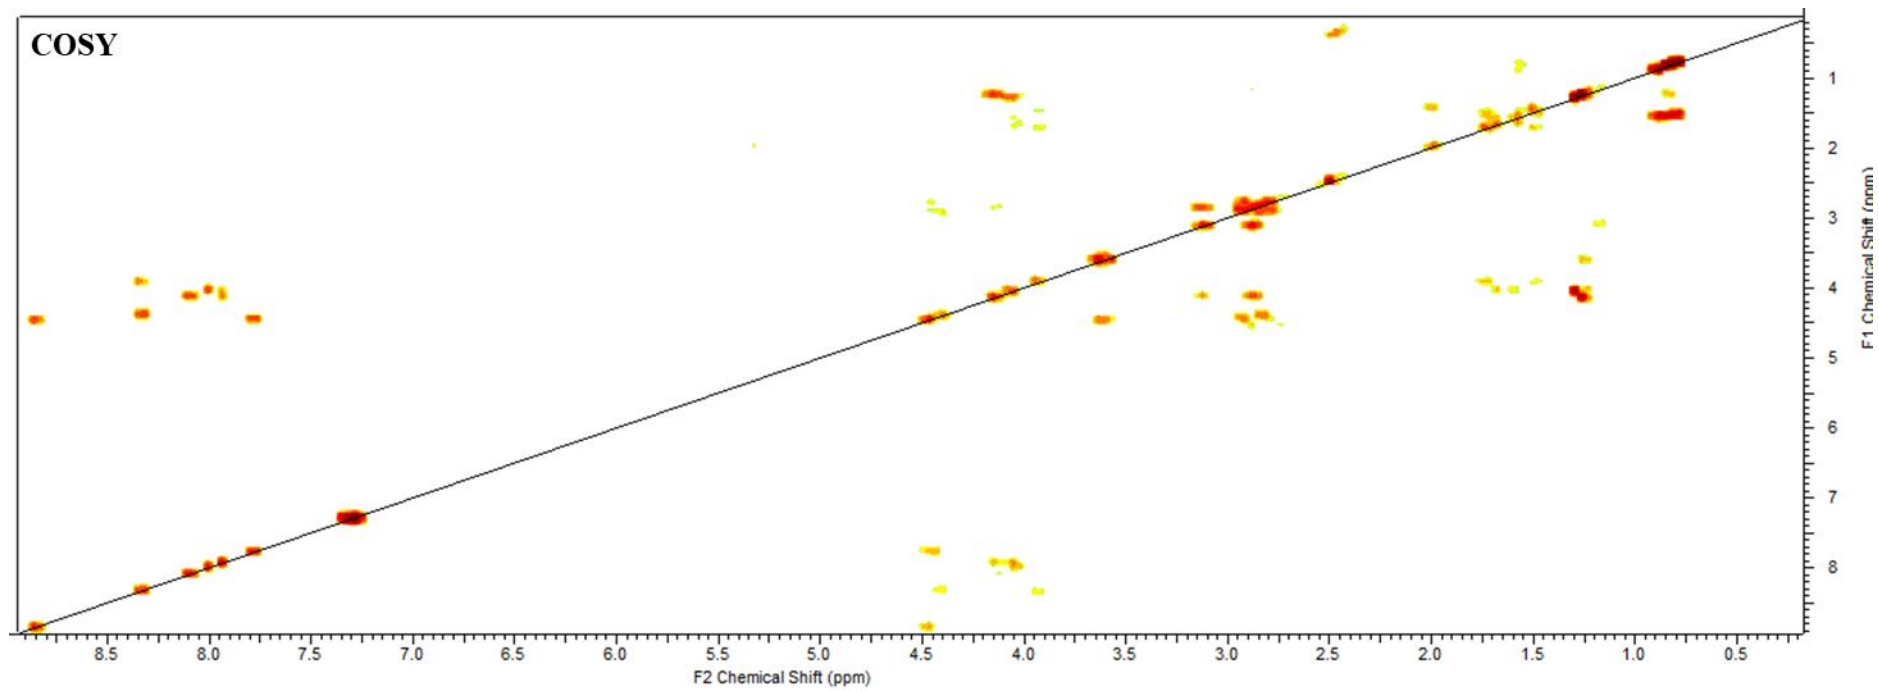

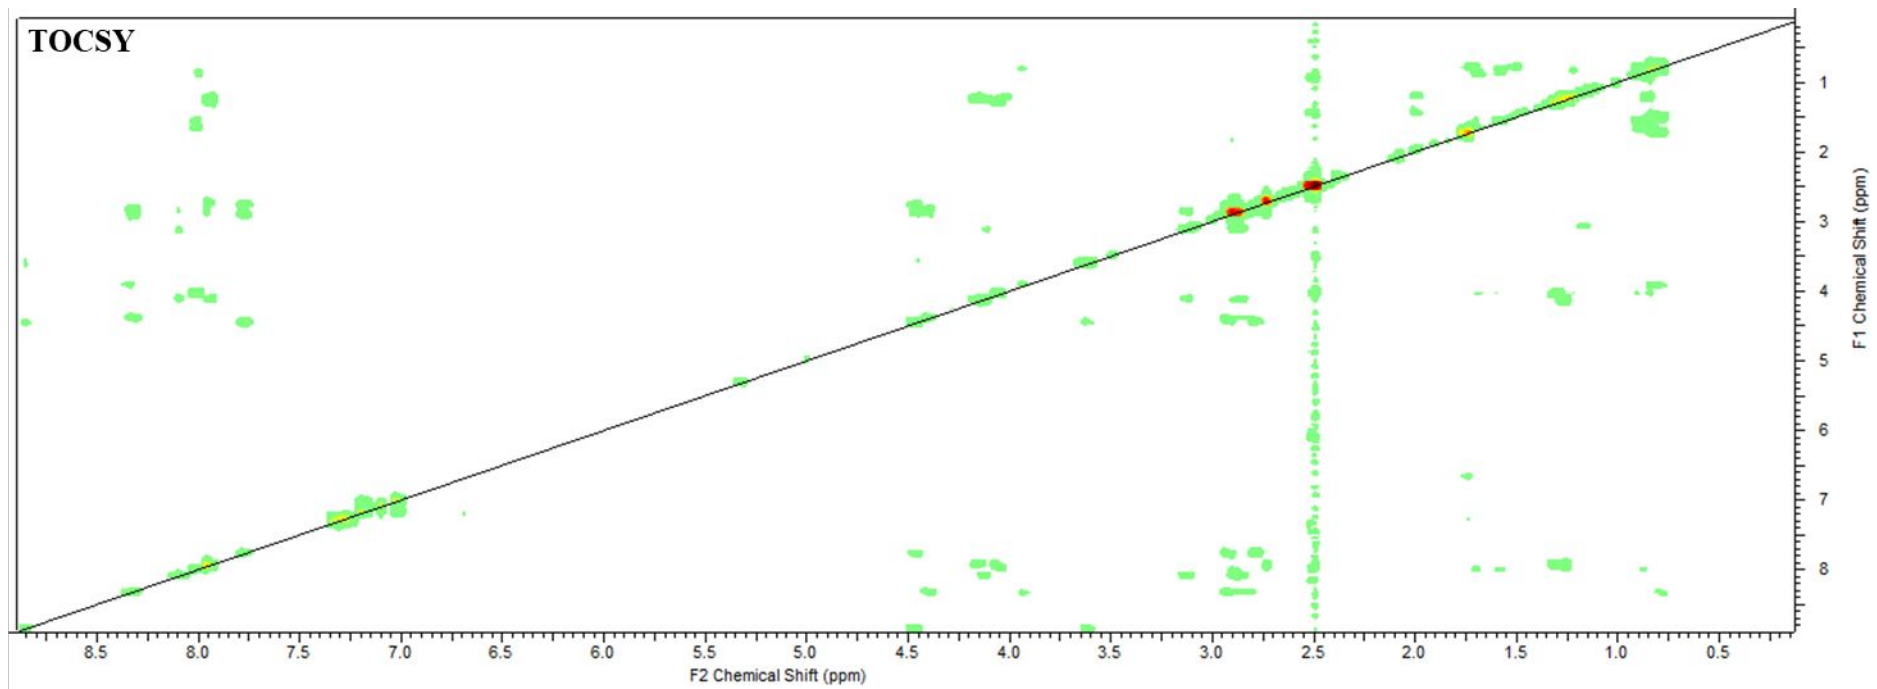



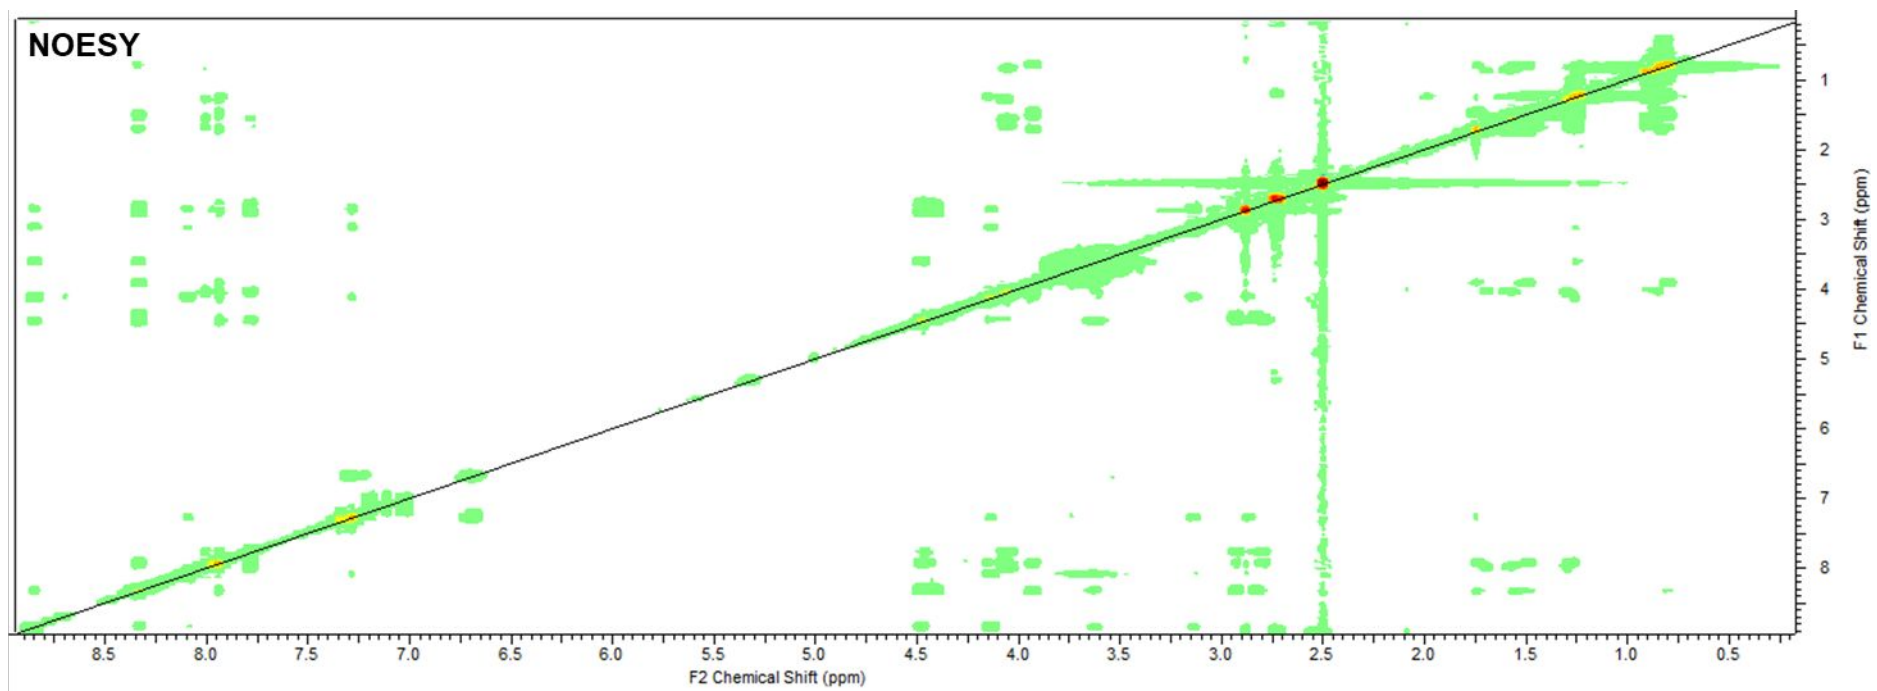

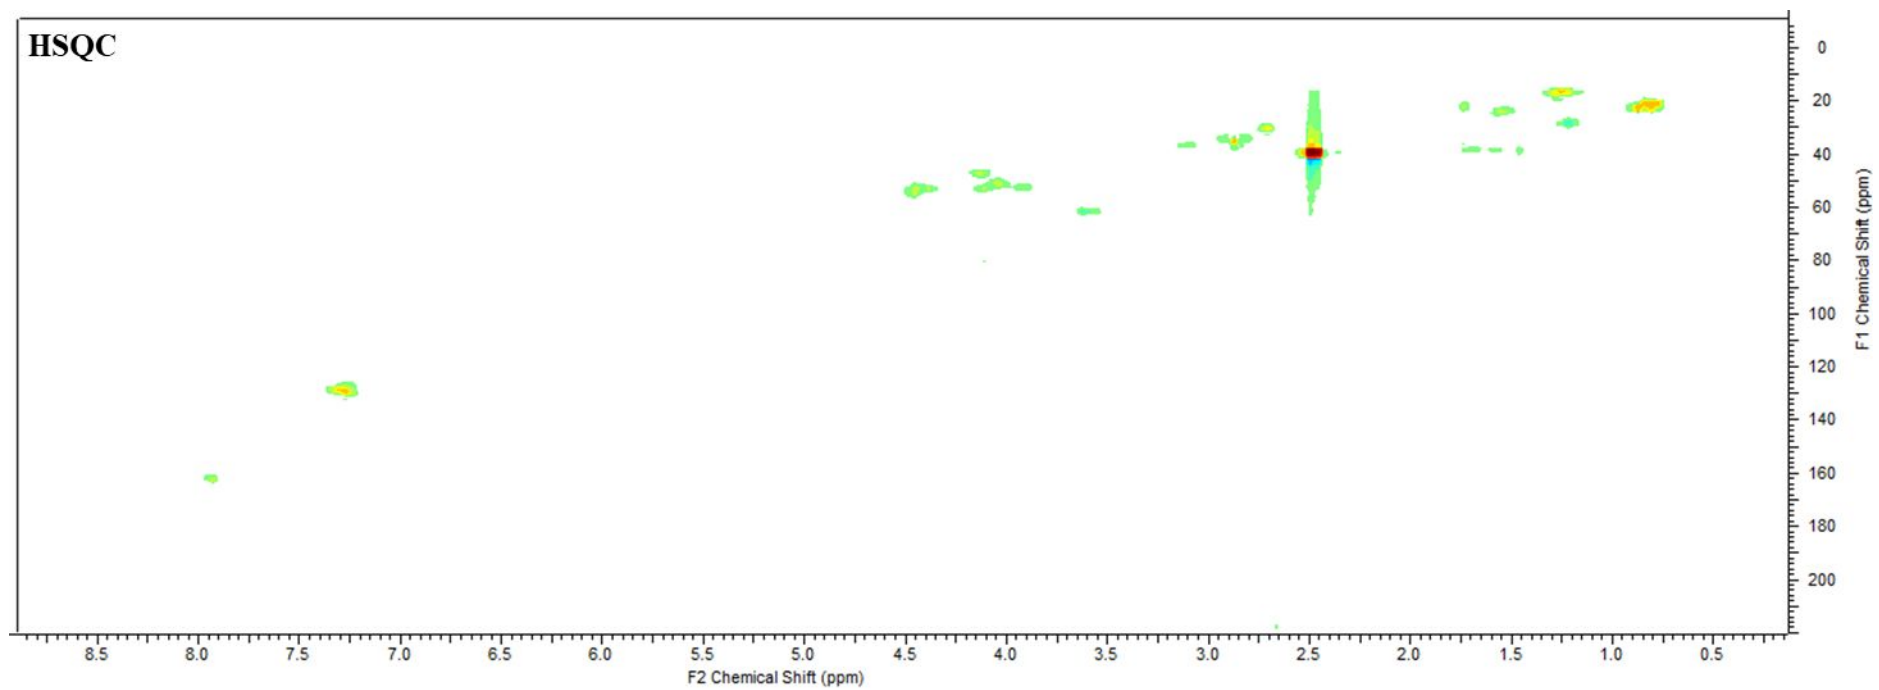

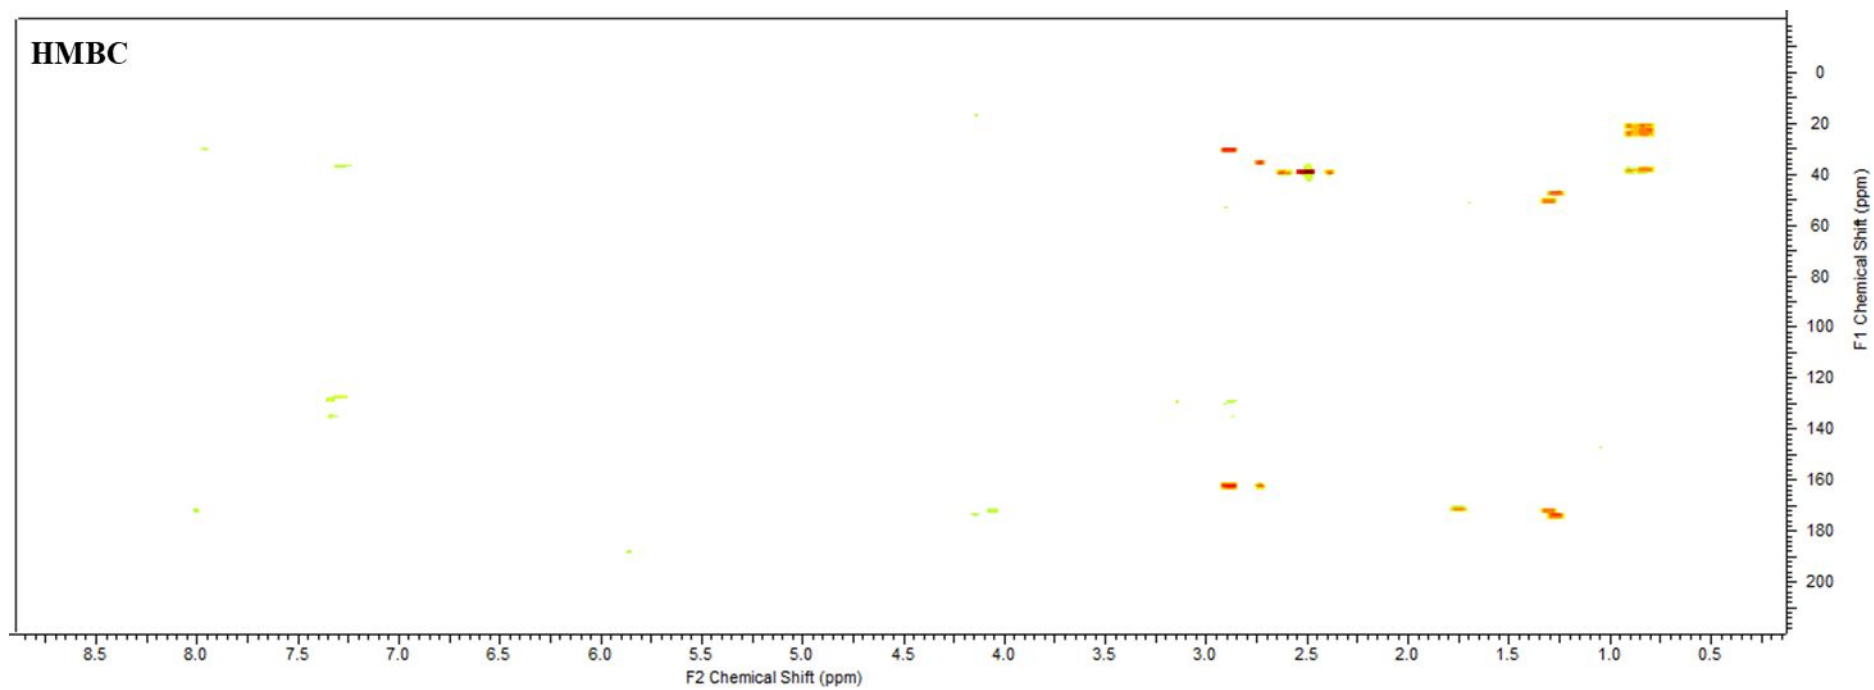

## Mutacin I Ring A Ser Analogue (15)

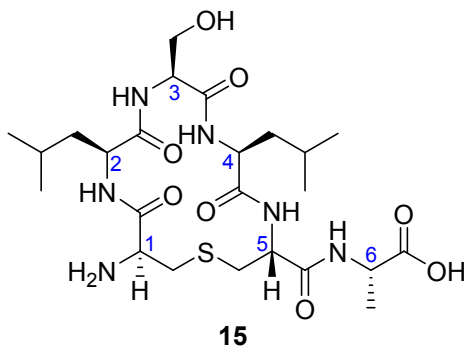

HRMS (ES+) m/z: [M + H]<sup>+</sup> Calcd for C<sub>24</sub>H<sub>43</sub>N<sub>6</sub>O<sub>8</sub>S 575.2863; found 575.2859.

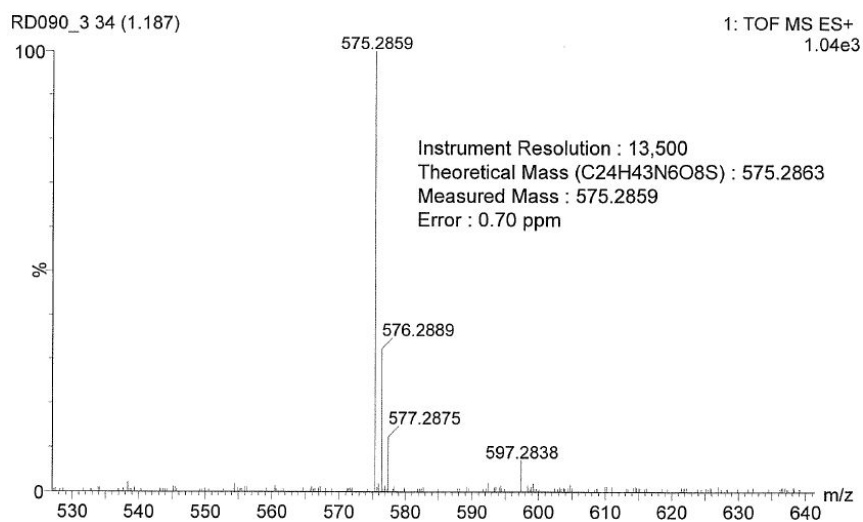

*analytical HPLC* (Fluka Analytical Discovery BIO C18-10 25 x 4.6 mm column on Agilent HPLC system) retention time 6.55 min.

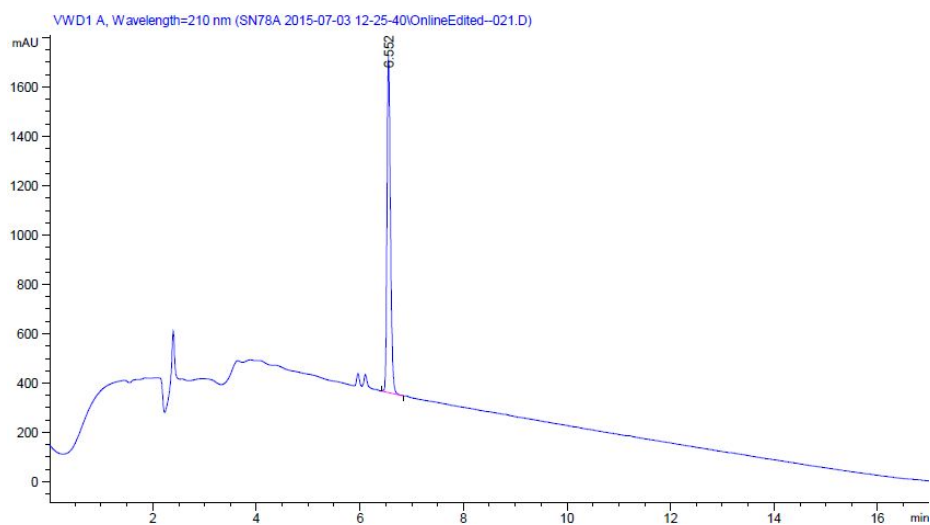

NMR  $\delta_{\text{H}}$  (600 MHz,  $(\text{CD}_3)_2\text{SO}$ ),  $\delta_{\text{C}}$  (150 MHz,  $(\text{CD}_3)_2\text{SO}$ )

**Table S12**

| Residue Number | $^1\text{H}$ |          |              |          |                      | Exchangeable              |
|----------------|--------------|----------|--------------|----------|----------------------|---------------------------|
|                | NH           | $\alpha$ | $\beta$      | $\gamma$ | $\delta$             |                           |
| 1 - Lan (Dha)  |              | 3.93     | 2.92<br>3.02 |          |                      | NH <sub>2</sub> - 8.19    |
| 2 - Leu        | 9.02         | 3.84     | 1.55<br>1.99 | 1.65     | a - 0.95<br>b - 0.89 |                           |
| 3 - Ser        | 7.94         | 4.09     | 3.69         |          |                      |                           |
| 4 - Leu        | 7.51         | 4.23     | 1.67         | 1.70     | a - 0.93<br>b - 0.84 |                           |
| 5 - Lan (Cys)  | 7.79         | 4.38     | 2.93         |          |                      |                           |
| 6 - Ala        | 7.79         | 4.14     | 1.27         |          |                      | CO <sub>2</sub> H - 12.63 |

**Table S13**

| Residue Number | $^{13}\text{C}$ |          |         |          |                        |
|----------------|-----------------|----------|---------|----------|------------------------|
|                | CO              | $\alpha$ | $\beta$ | $\gamma$ | $\delta$               |
| 1 - Lan (Dha)  | 170.14          | 55.05    | 35.99   |          |                        |
| 2 - Leu        | 174.84          | 57.03    | 40.37   | 27.37    | a - 26.37<br>b - 26.11 |
| 3 - Ser        | 173.32          | 61.05    | 63.63   |          |                        |
| 4 - Leu        | 174.92          | 54.66    | 42.29   | 28.30    | a - 24.13<br>b - 24.57 |
| 5 - Lan (Cys)  | 172.27          | 55.45    | 37.54   |          |                        |
| 6 - Ala        | 176.80          | 50.83    | 20.23   |          |                        |

d6-DMSO

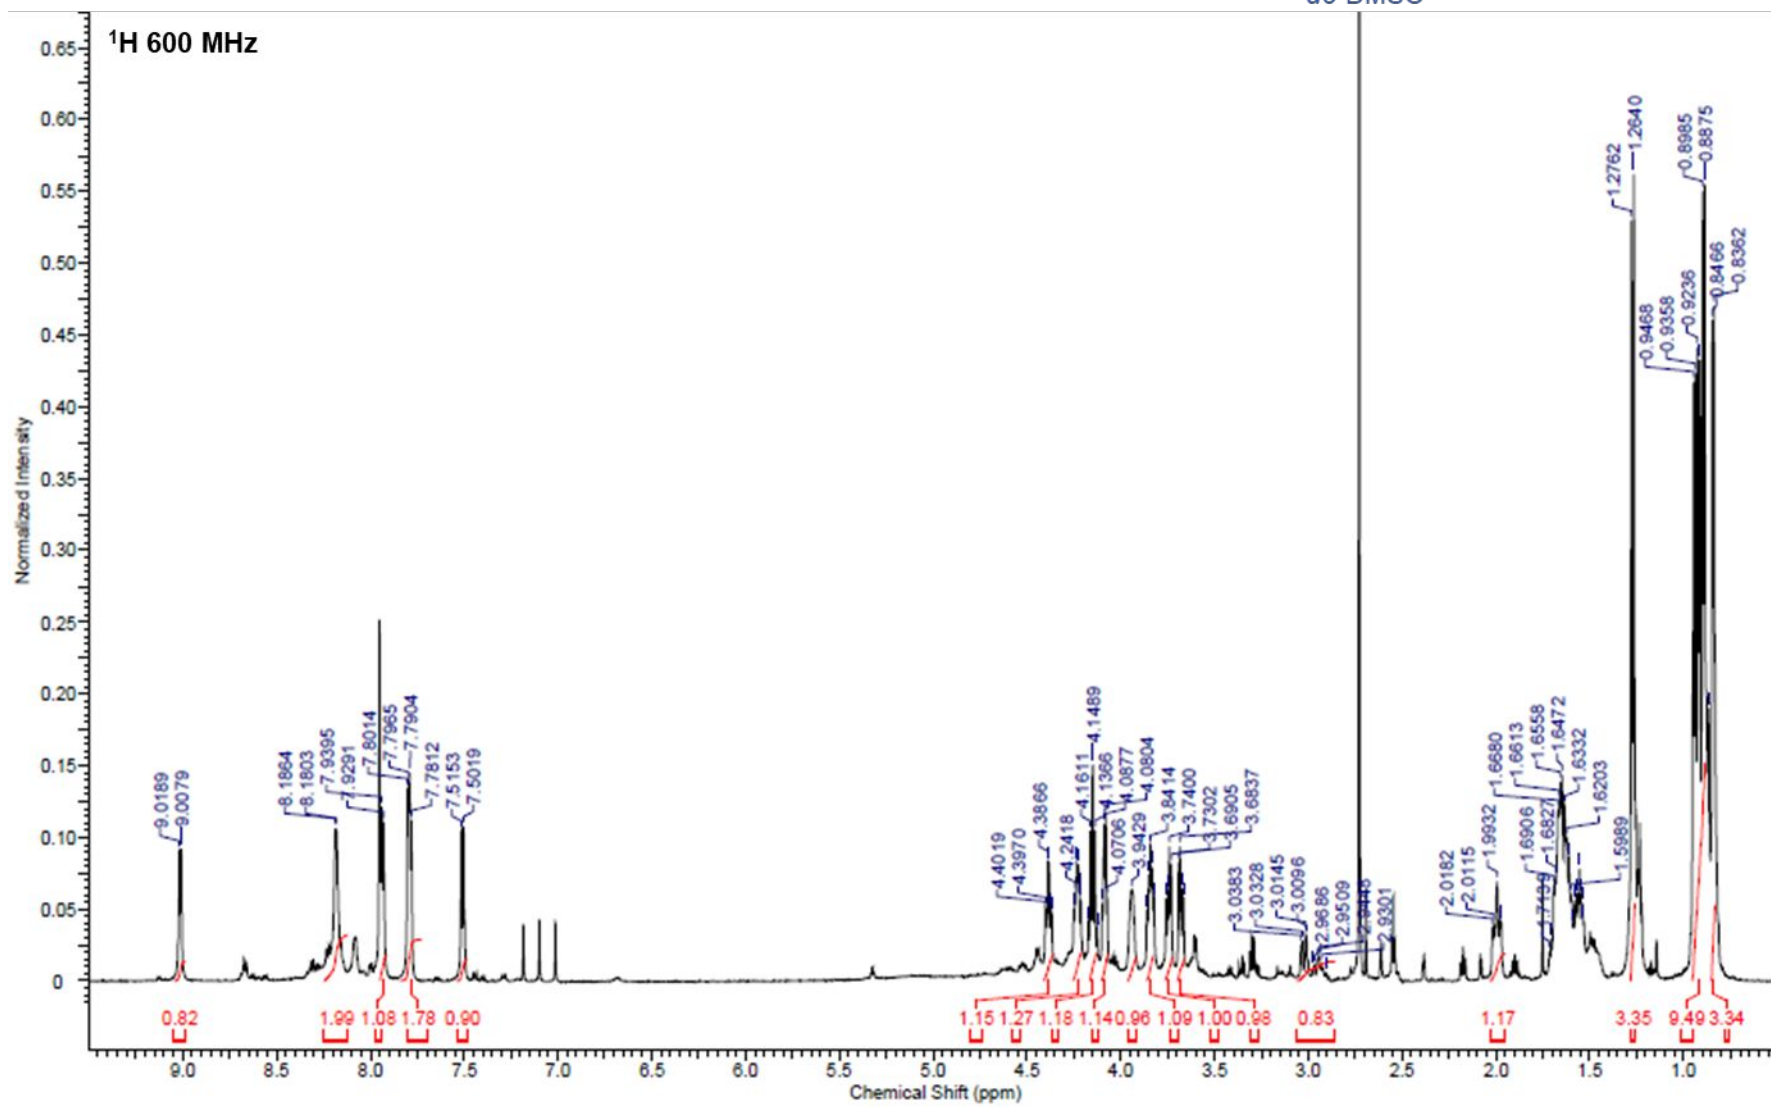

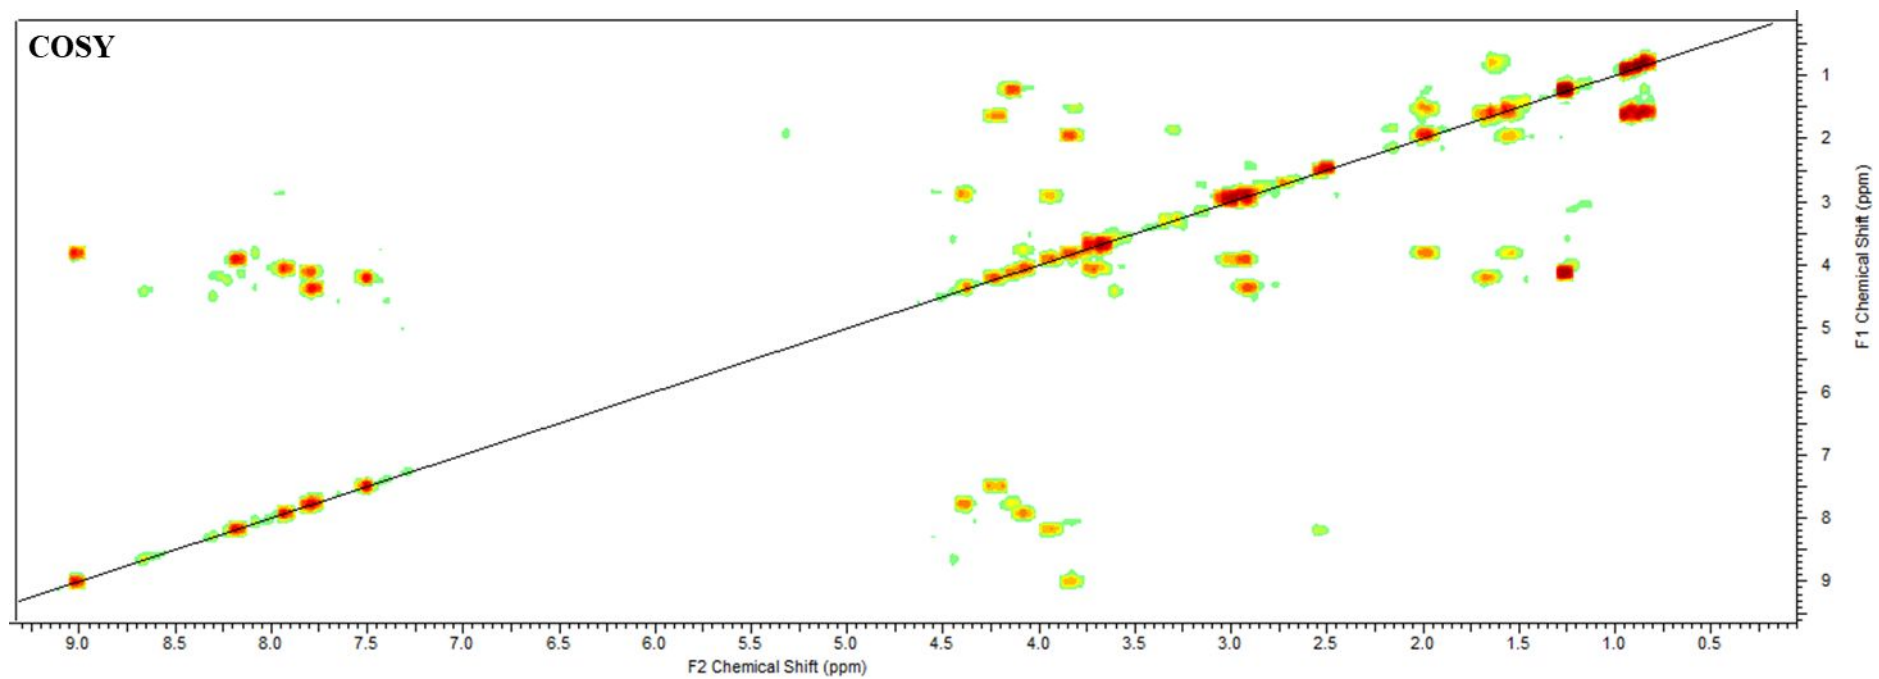

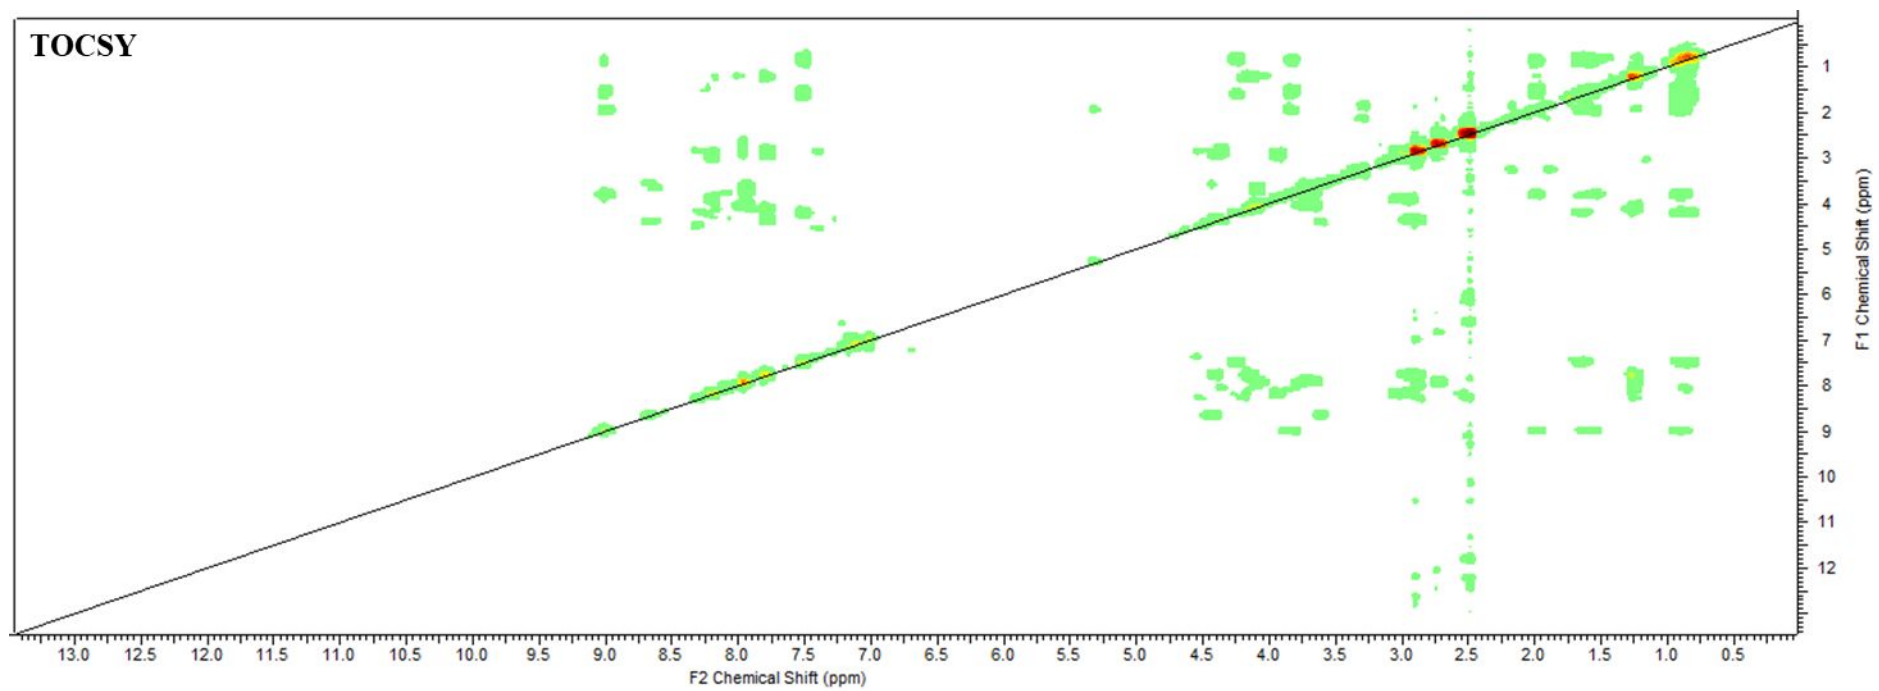



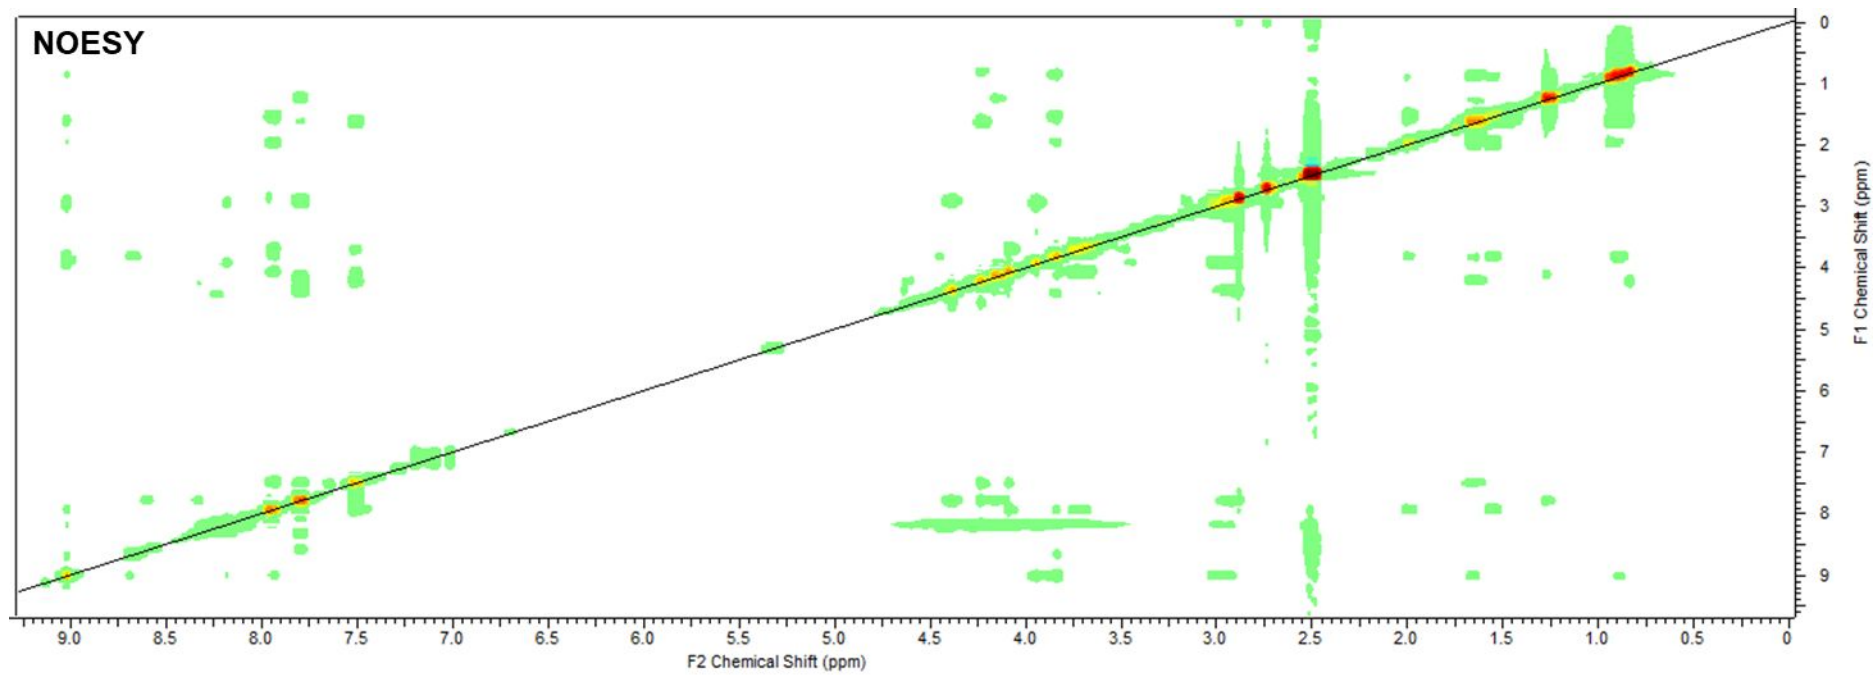

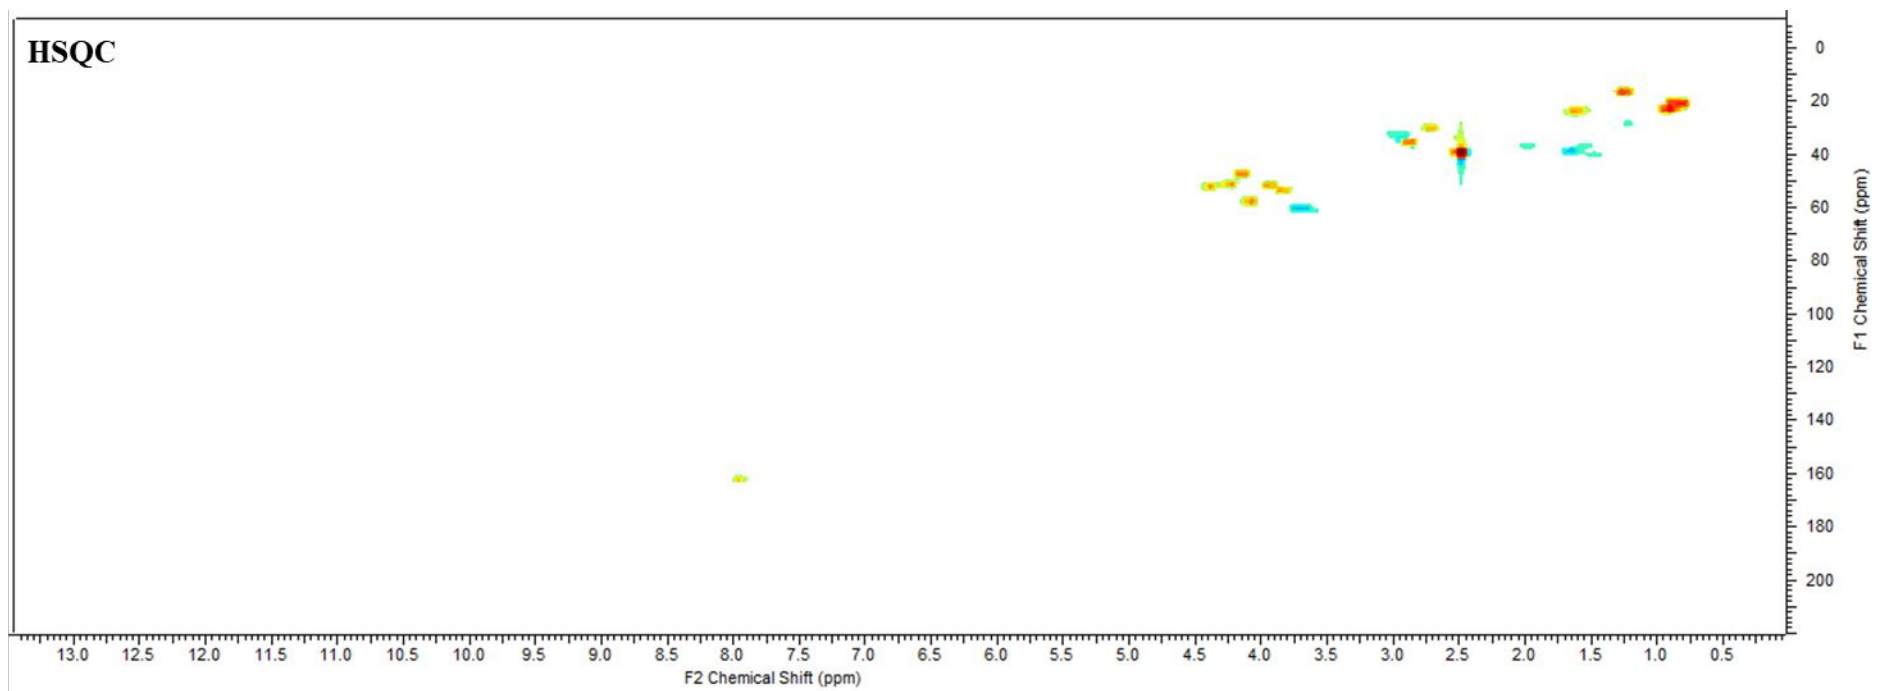

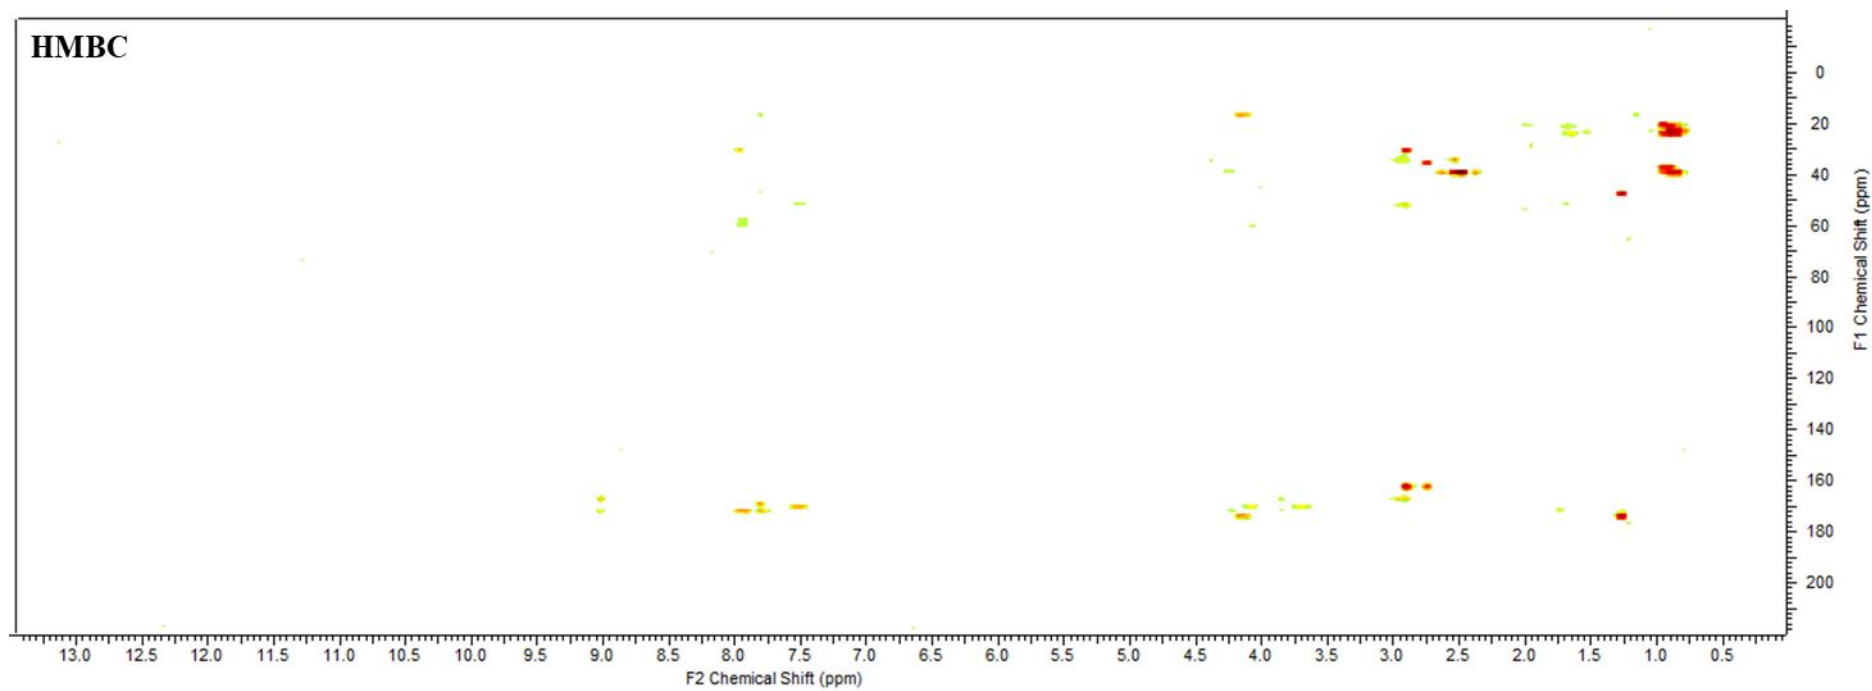

## Mutacin I Ring A Truncated WT (25) via Sec(Ph) Elimination

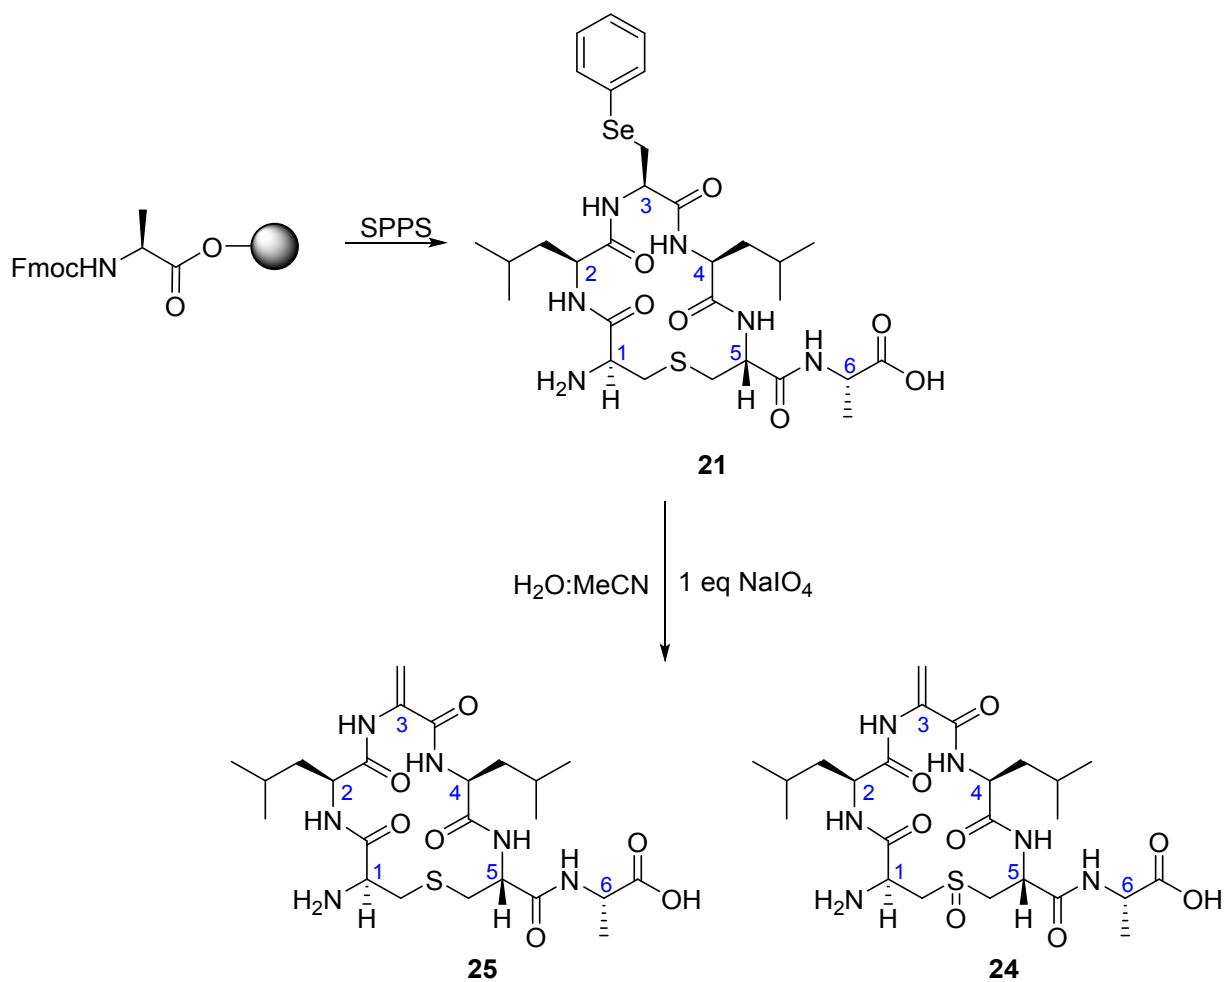

$m/z$  (HRMS, ES<sup>+</sup>) required for [C<sub>24</sub>H<sub>40</sub>N<sub>6</sub>O<sub>7</sub>S+H]<sup>+</sup> 557.2758, found [C<sub>24</sub>H<sub>40</sub>N<sub>6</sub>O<sub>7</sub>S+H]<sup>+</sup> 557.2760.

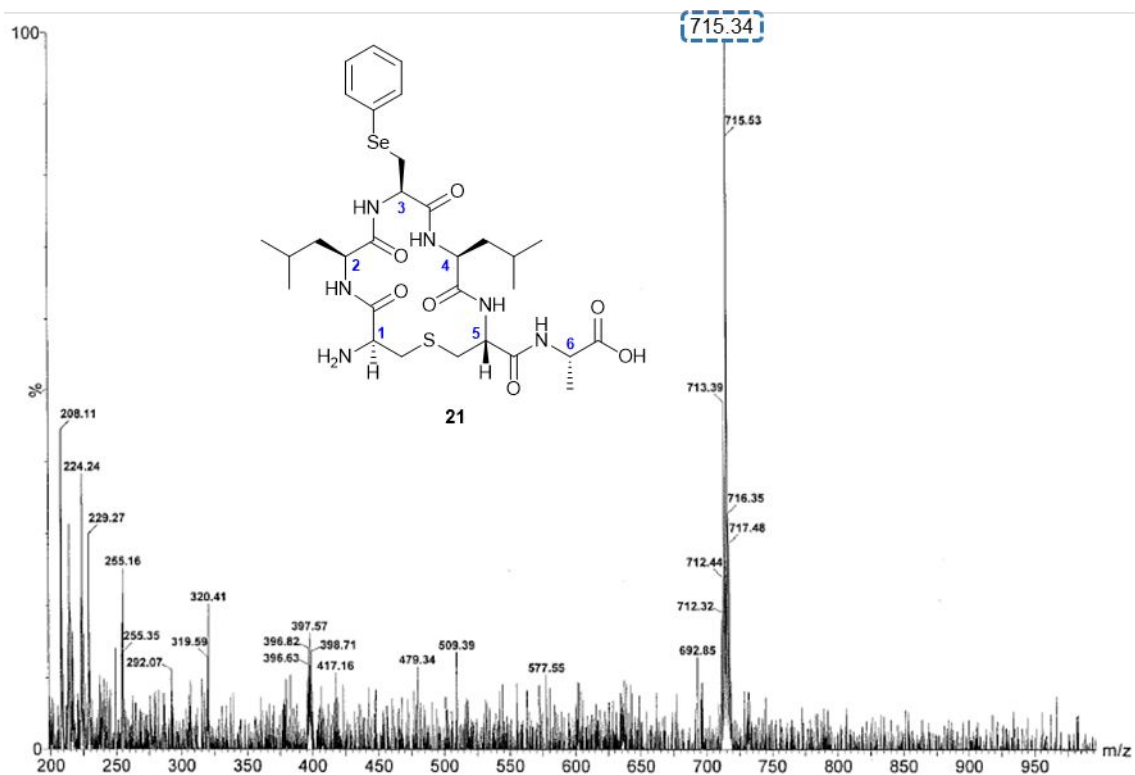

LC/MS of intermediate **21** – before attempted elimination

Characterisation data for **25**

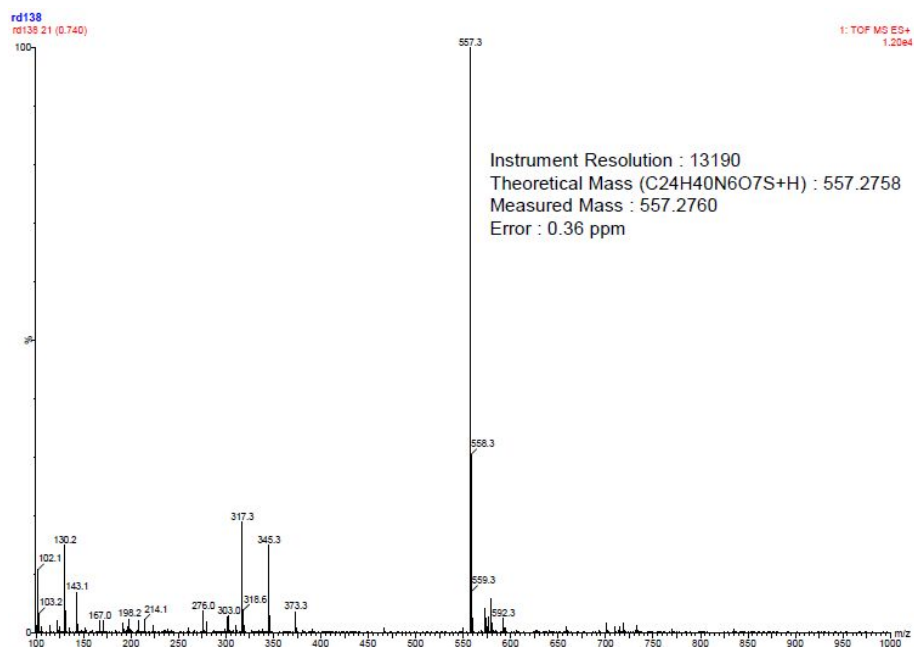

*analytical HPLC* (Dr Maisch GmbH Reprosil Gold 200 C8 5 $\mu$ m 250 x 4.6 mm column on Dionex HPLC system) retention time 12.19 min.

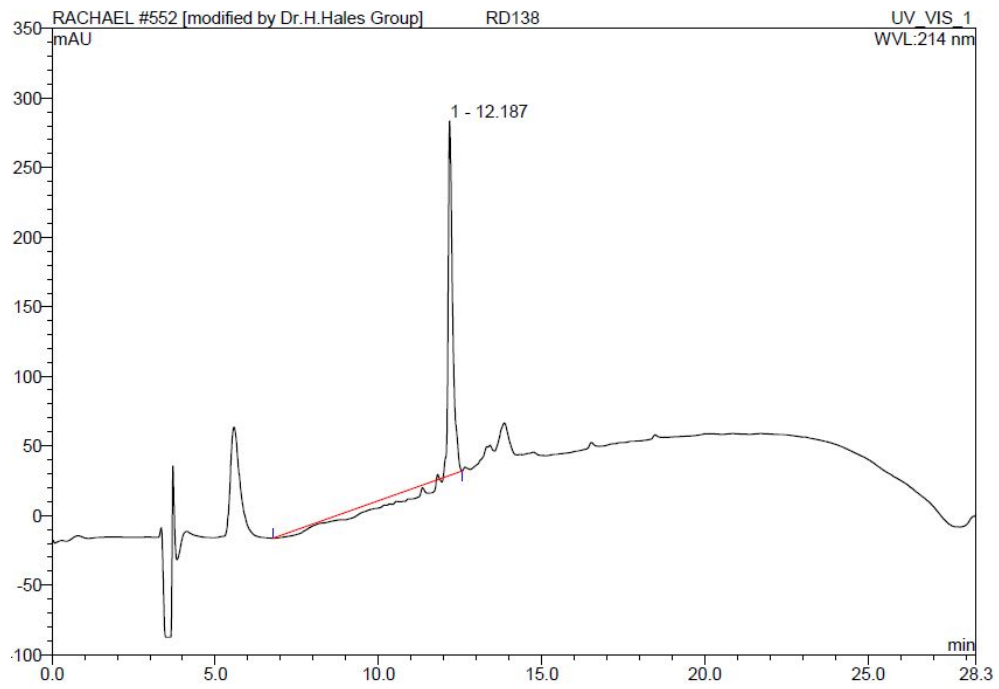

## Mutacin I Ring A WT (12)

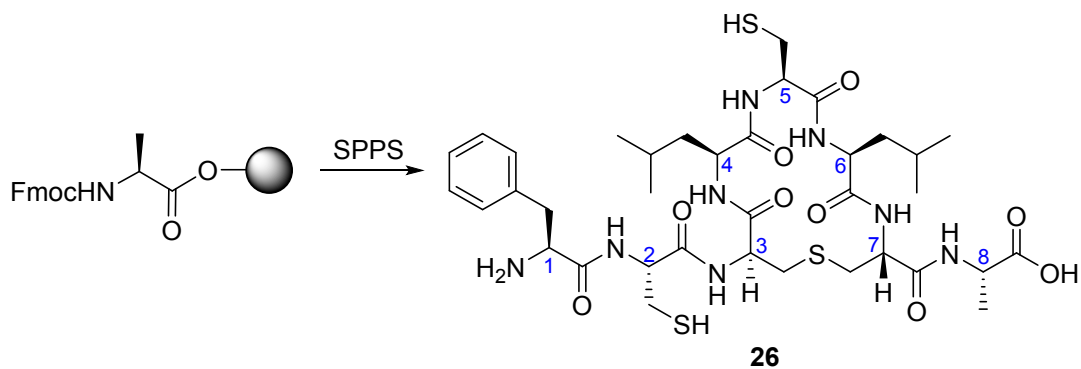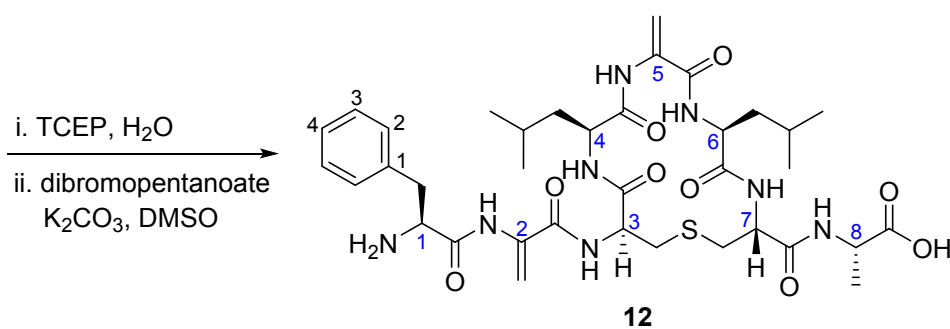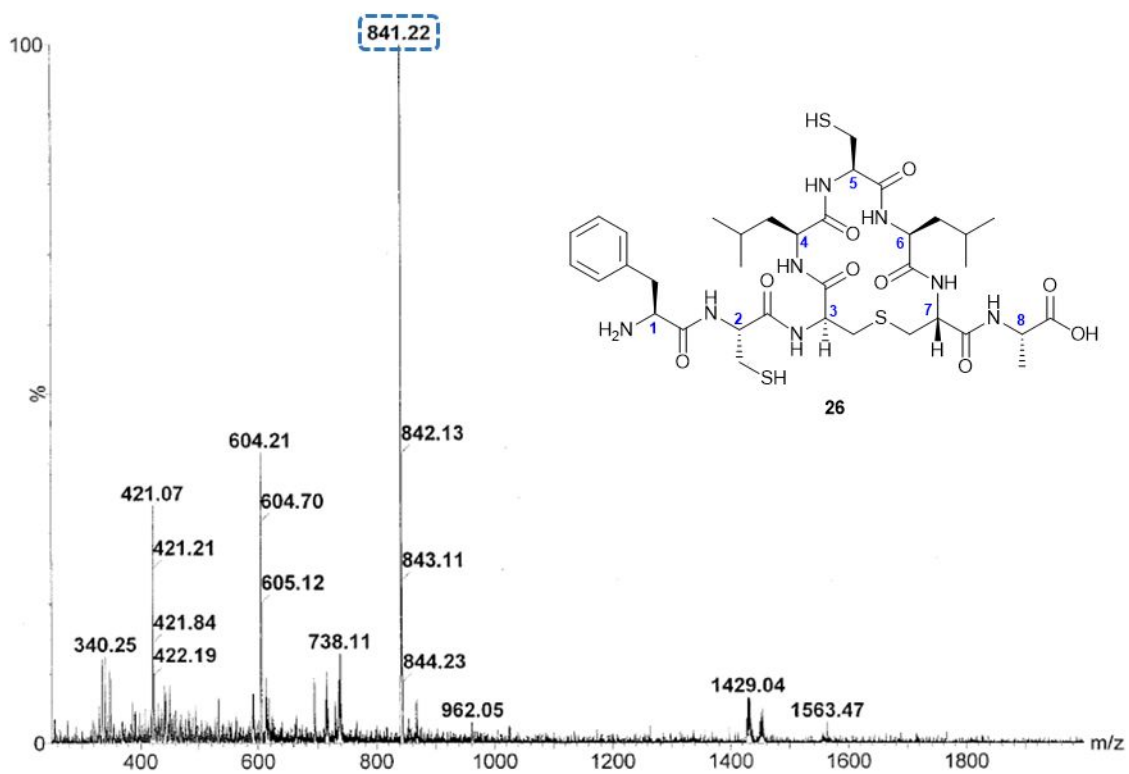

LCMS of intermediate **26** – after purification

## Characterisation data for **12**

HRMS (ES+) m/z: [M + H]<sup>+</sup> Calcd for C<sub>36</sub>H<sub>53</sub>N<sub>8</sub>O<sub>9</sub>S 773.3656; found 773.3660.

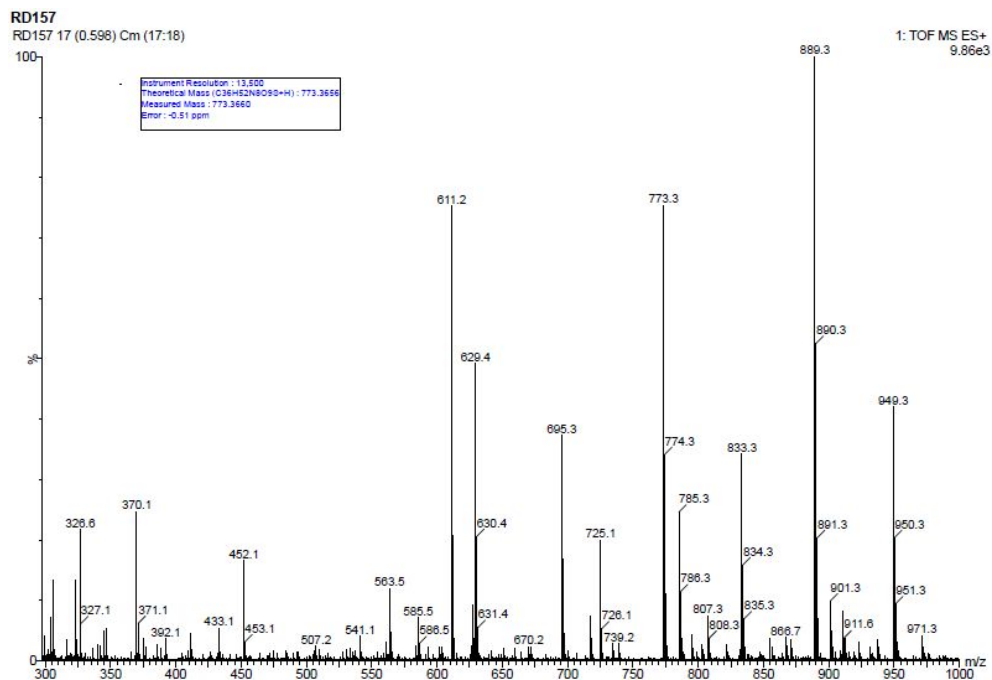

*analytical HPLC* (Dr Maisch GmbH Reprosil Gold 200 C8 5 $\mu$ m 250 x 4.6 mm column on Dionex HPLC system) retention time 15.07 min.

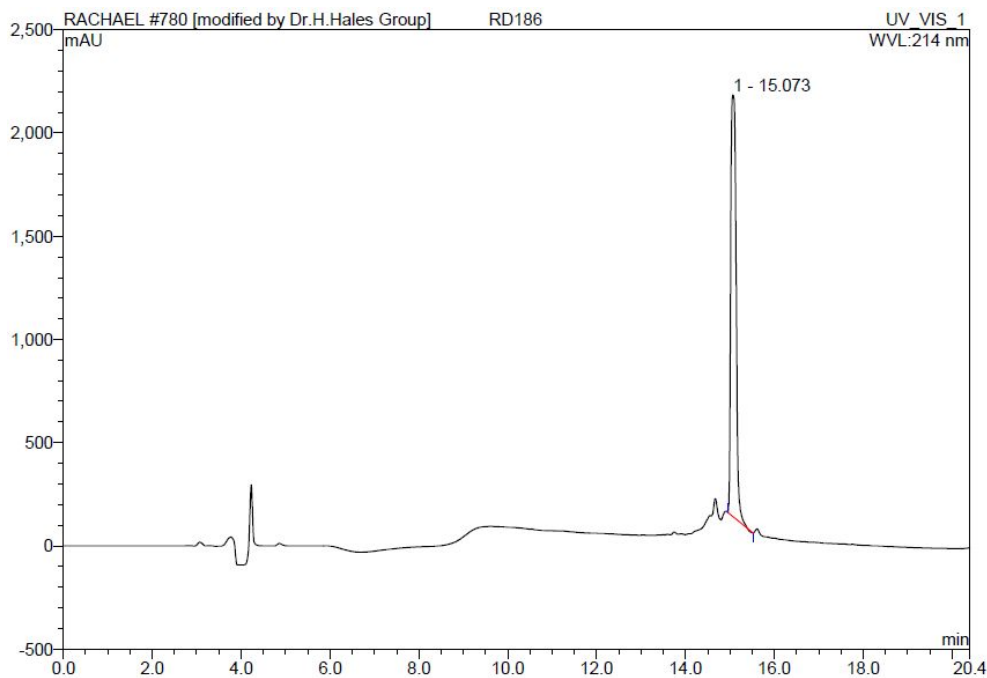



*analytical HPLC* (Gradient 5-95% acetonitrile (0.1% TFA) in H<sub>2</sub>O (0.1% TFA) over 1h. Agilent Technologies 1260 Infinity HPLC system with ACE5 C18-300 150 x 4.6 mm column) retention time 23.1 min.

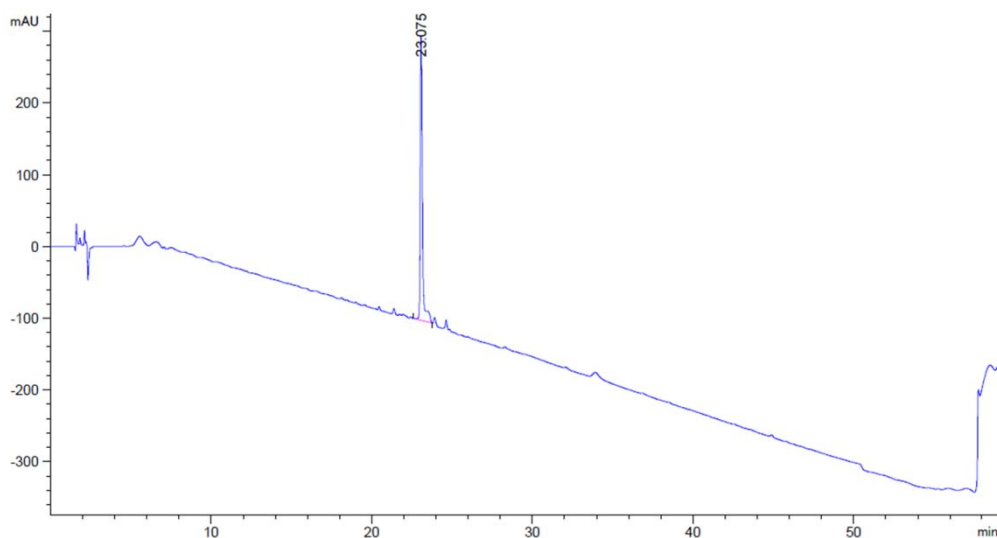

*NMR*  $\delta_{\text{H}}$  (600 MHz, (CD<sub>3</sub>)<sub>2</sub>SO),  $\delta_{\text{C}}$  (150 MHz, (CD<sub>3</sub>)<sub>2</sub>SO)

**Table S14**

| Residue Number | NH   | <sup>1</sup> H |              |          |                      | Ar                               | Exchangeable              |
|----------------|------|----------------|--------------|----------|----------------------|----------------------------------|---------------------------|
|                |      | $\alpha$       | $\beta$      | $\gamma$ | $\delta$             |                                  |                           |
| 1 - Phe        |      | 4.42           | 3.11         |          |                      | 2 - 7.28<br>3 - 7.33<br>4 - 7.27 | NH <sub>2</sub> - 8.19    |
| 2 - Dha        | -    |                | 5.63<br>6.23 |          |                      |                                  |                           |
| 3 - Lan (Dha)  | 8.57 | 4.59           | 2.75<br>3.19 |          |                      |                                  |                           |
| 4 - Leu        | 8.40 | 4.18           | 1.67         | 1.58     | a - 0.86<br>b - 0.81 |                                  |                           |
| 5 - Dha        | 8.81 |                | 5.54<br>5.97 |          |                      |                                  |                           |
| 6 - Leu        | 8.43 | 4.36           | 1.65         | 1.52     | a - 0.89<br>b - 0.85 |                                  |                           |
| 7 - Lan (Cys)  | 7.94 | 4.53           | 2.77<br>3.02 |          |                      |                                  |                           |
| 8 - Ala        | 8.30 | 4.18           | 1.27         |          |                      |                                  | CO <sub>2</sub> H - 12.56 |

**Table S15**

| <sup>13</sup> C |        |          |         |          |                        |                                                      |
|-----------------|--------|----------|---------|----------|------------------------|------------------------------------------------------|
| Residue Number  | CO     | $\alpha$ | $\beta$ | $\gamma$ | $\delta$               | Ar                                                   |
| 1 - Phe         |        | 55.35    | 53.27   |          |                        | 1 - 132.57<br>2 - 132.45<br>3 - 131.61<br>4 - 130.23 |
| 2 - Dha         | 166.70 | 137.87   | 107.67  |          |                        |                                                      |
| 3 - Lan (Dha)   | 173.46 | 56.07    | 36.35   |          |                        |                                                      |
| 4 - Leu         | 173.72 | 55.11    | 40.82   | 27.51    | a - 26.90<br>b - 24.69 |                                                      |
| 5 - Dha         | 167.85 | 138.09   | 108.92  |          |                        |                                                      |
| 6 - Leu         | 174.75 | 54.29    | 41.60   | 27.23    | a - 26.27<br>b - 24.30 |                                                      |
| 7 - Lan (Cys)   | 173.02 | 57.30    | 36.37   |          |                        |                                                      |
| 8 - Ala         | 176.92 | 50.84    | 20.48   |          |                        |                                                      |

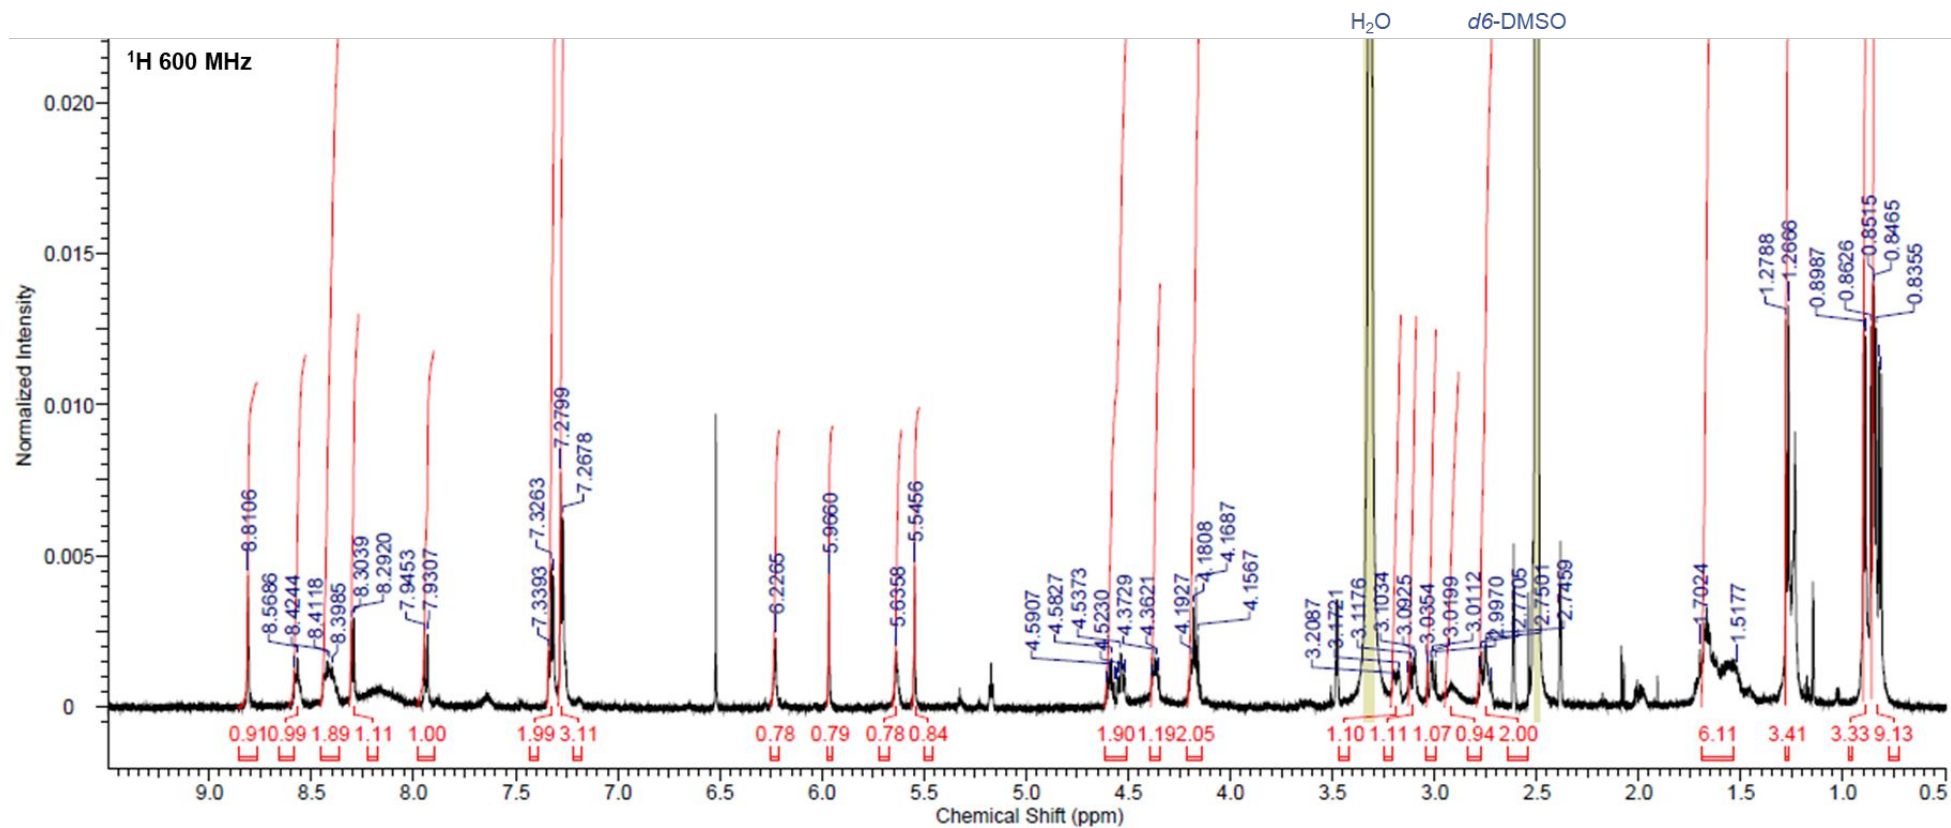

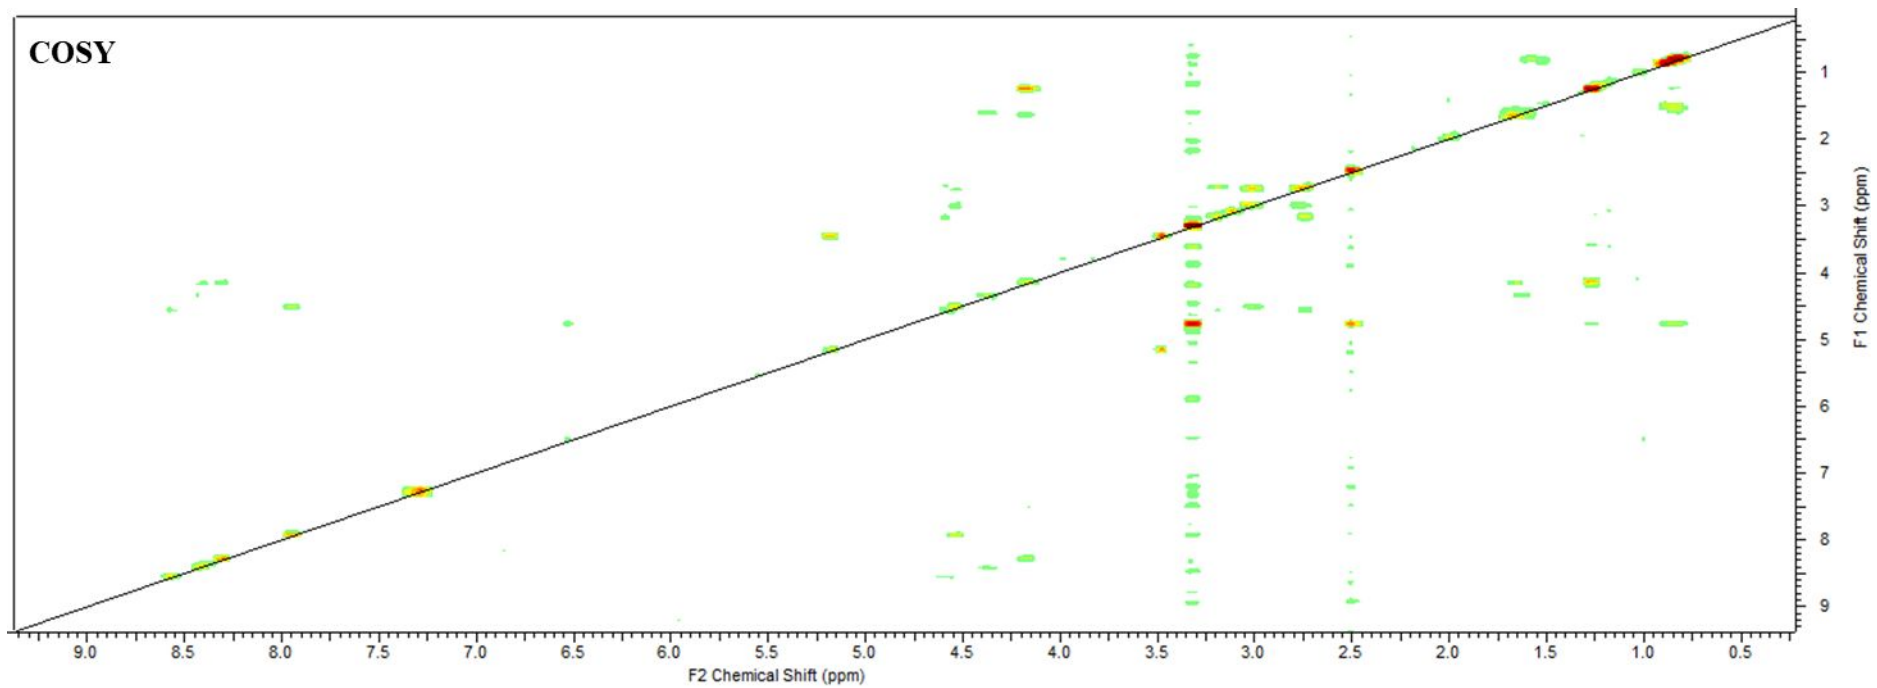

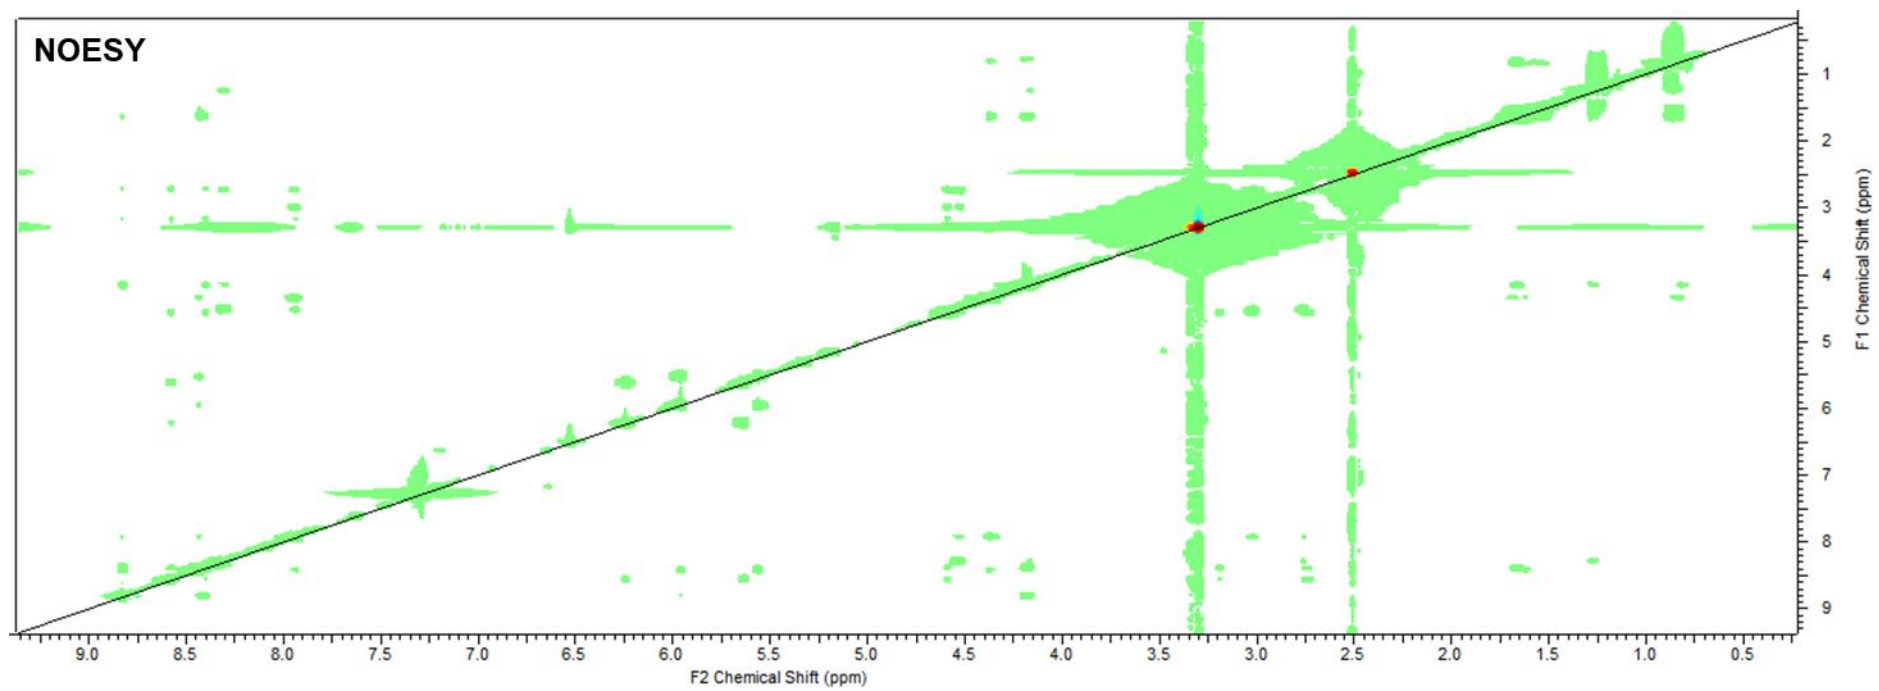

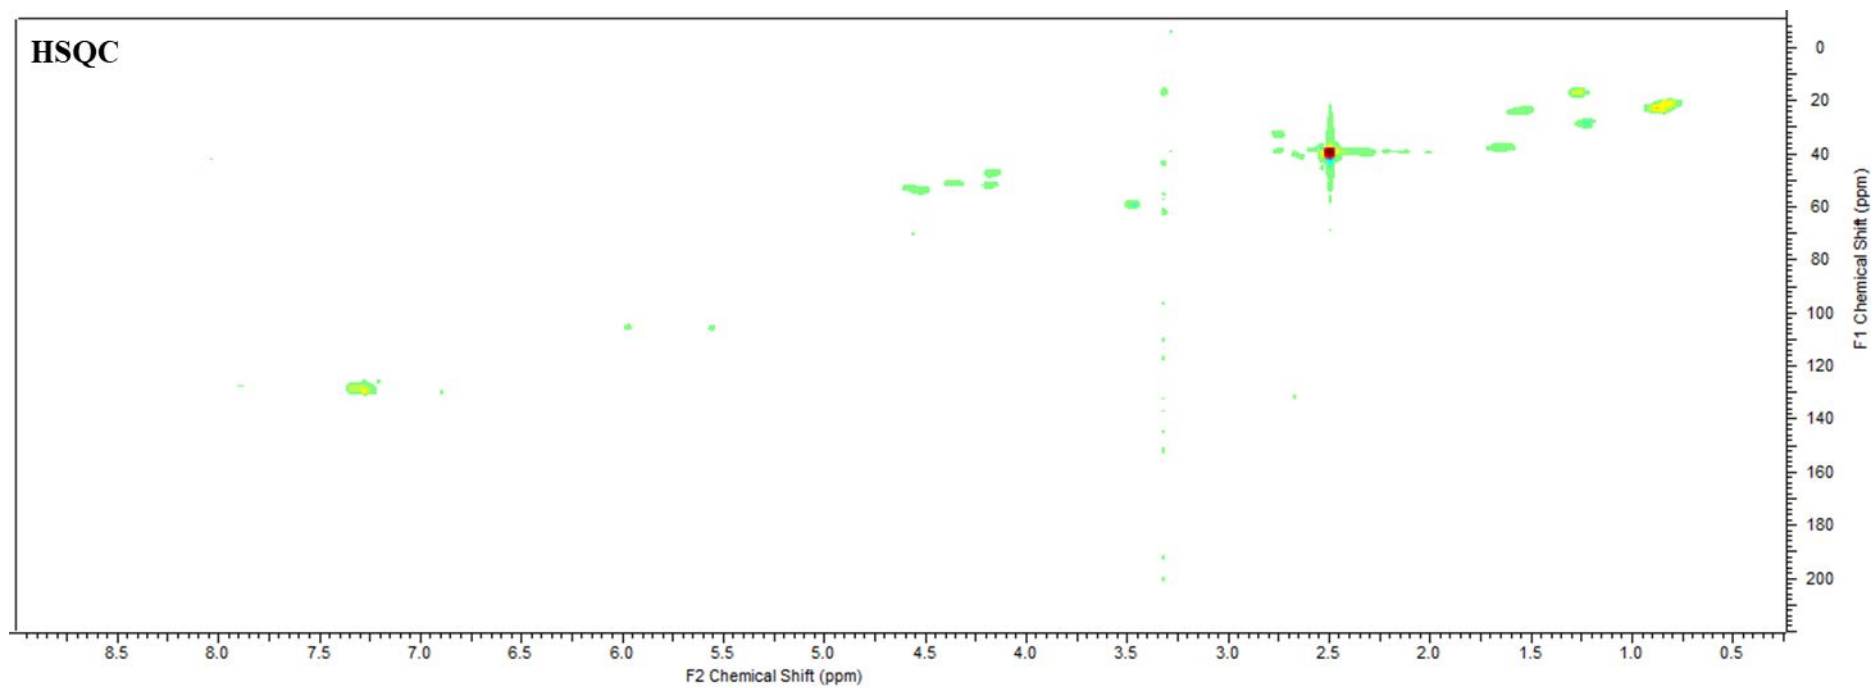

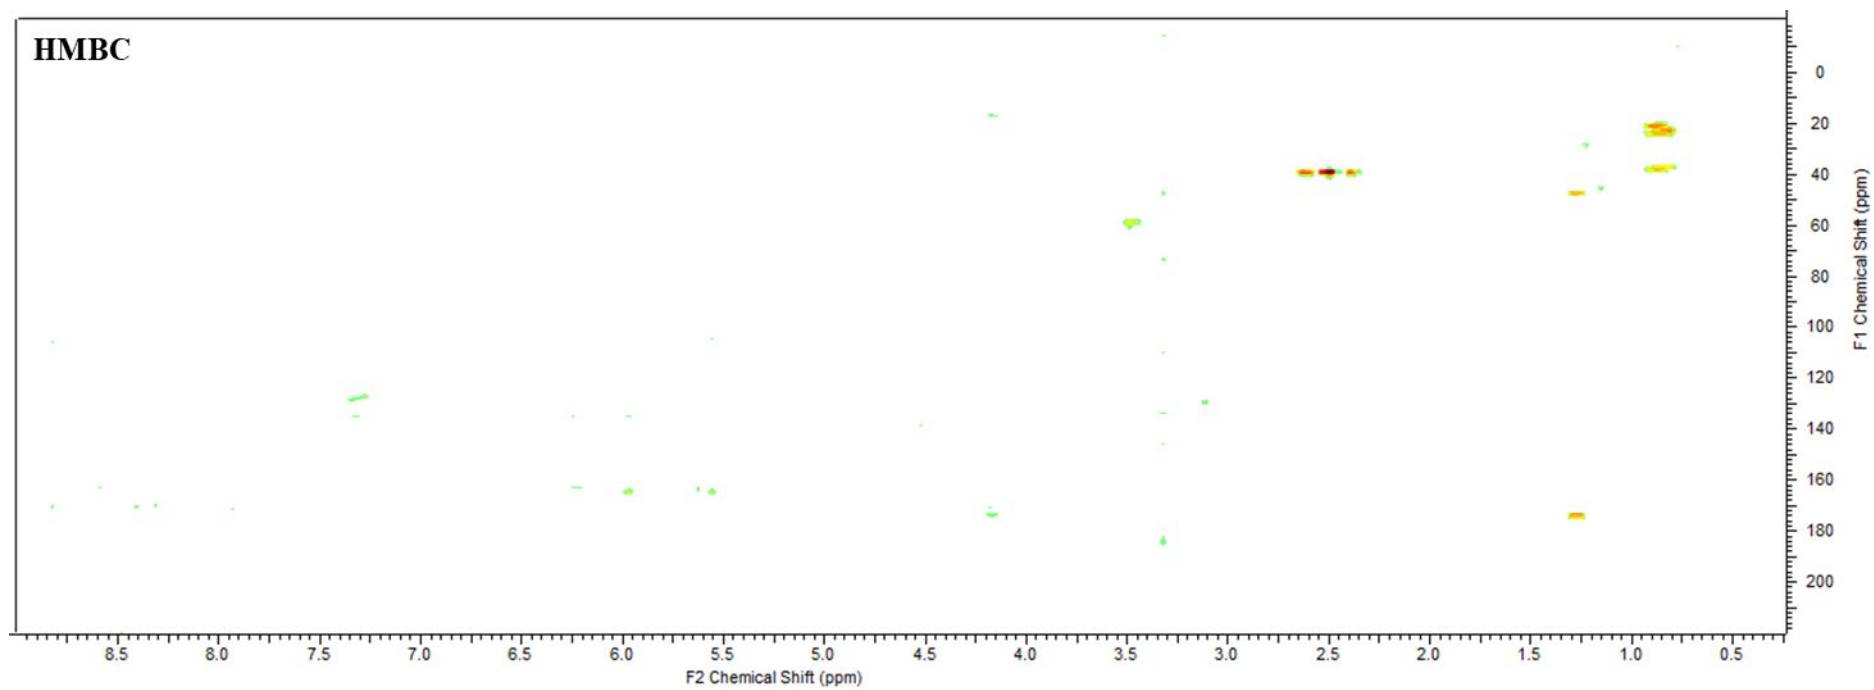

## Nisin Ring A WT (13)

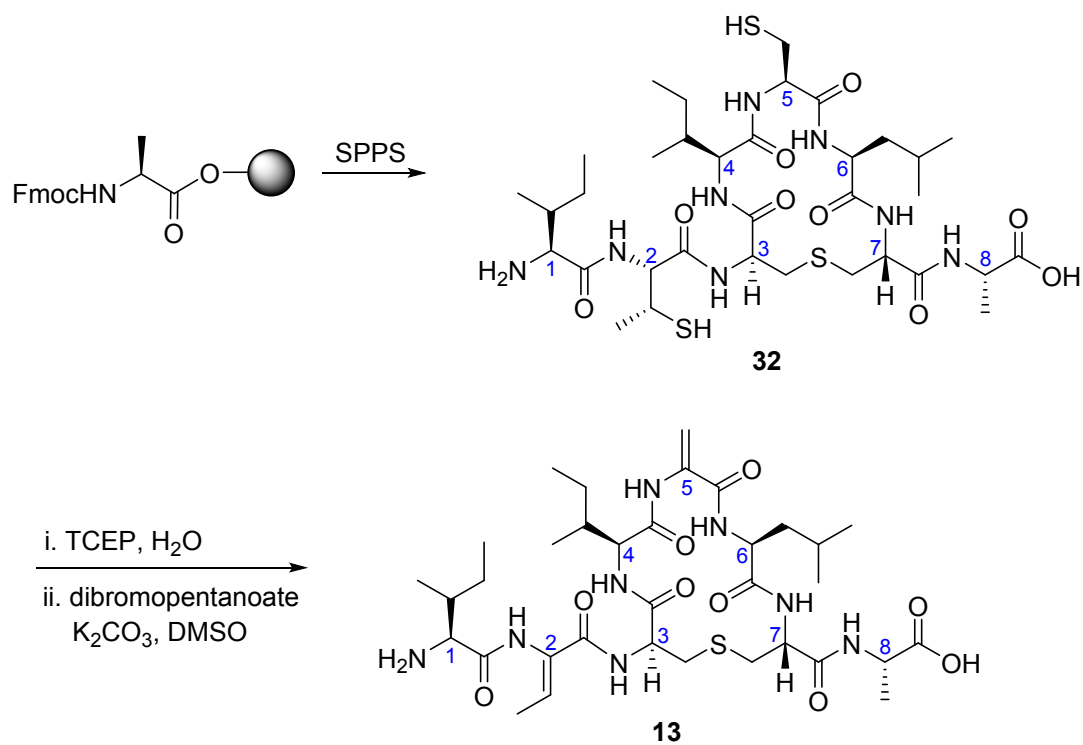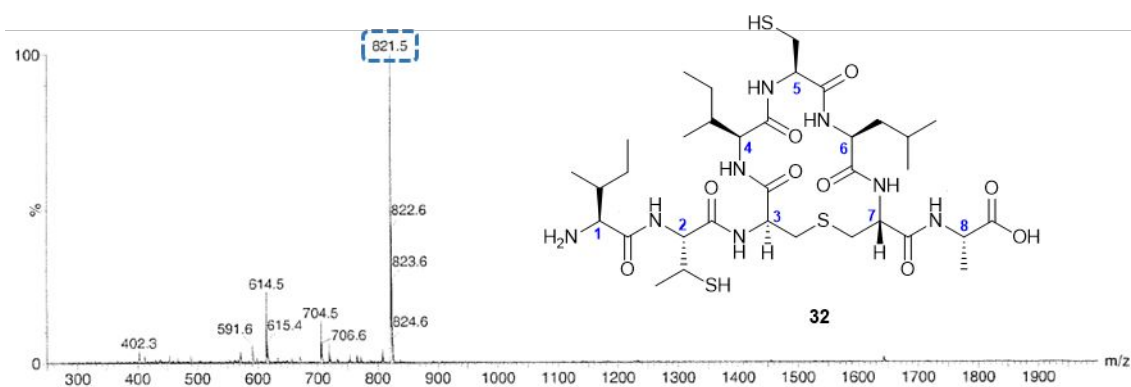

LCMS of intermediate **32**– after purification



Characterisation data for **13**

HRMS (ES+) m/z: [M + H]<sup>+</sup> Calcd for C<sub>34</sub>H<sub>57</sub>N<sub>8</sub>O<sub>9</sub>S 753.3969; found 753.3948.

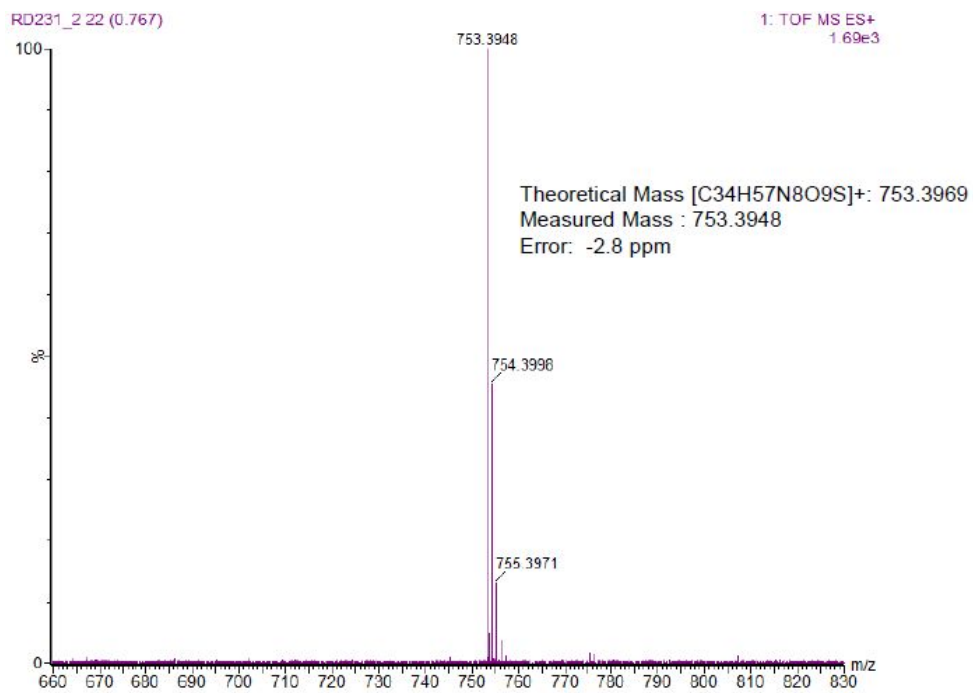

*analytical HPLC* (Dr Maisch GmbH Reprisil Gold 200 C8 5 $\mu$ m 250 x 4.6 mm column on Agilent HPLC system) retention time 9.96 min.

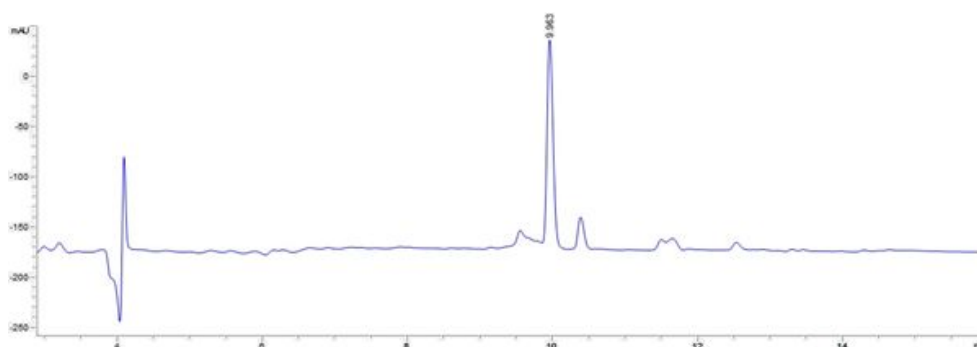

NMR  $\delta_H$  (600 MHz,  $(CD_3)_2SO$ ),  $\delta_C$  (150 MHz,  $(CD_3)_2SO$ )

**Table S16**

| Residue Number | $^1H$ |          |              |                                                        |                      |                           |
|----------------|-------|----------|--------------|--------------------------------------------------------|----------------------|---------------------------|
|                | NH    | $\alpha$ | $\beta$      | $\gamma$                                               | $\delta$             | Exchangeable              |
| 1 - Ile        |       | 3.79     | 1.91         | CH <sub>2</sub> - 1.18, 1.53<br>CH <sub>3</sub> - 0.97 | 0.89                 | NH <sub>2</sub> - 8.09    |
| 2 - Dhb        | 9.78  |          | 6.30         | 1.71                                                   |                      |                           |
| 3 - Lan (Dha)  | 8.15  | 4.38     | 2.94         |                                                        |                      |                           |
| 4 - Ile        | 7.94  | 4.09     | 2.00         | CH <sub>2</sub> - 1.08, 1.38<br>CH <sub>3</sub> - 0.88 | 0.77                 |                           |
| 5 - Dha        | 8.82  |          | 5.53<br>6.04 |                                                        |                      |                           |
| 6 - Leu        | 8.70  | 4.25     | 1.63         | 1.55                                                   | a - 0.86<br>b - 0.90 |                           |
| 7 - Lan (Cys)  | 7.94  | 4.47     | 2.81<br>2.95 |                                                        |                      |                           |
| 8 - Ala        | 8.21  | 4.17     | 1.27         |                                                        |                      | CO <sub>2</sub> H - 12.61 |

**Table S17**

| Residue Number | $^{13}C$ |          |         |                                                    |                        |
|----------------|----------|----------|---------|----------------------------------------------------|------------------------|
|                | CO       | $\alpha$ | $\beta$ | $\gamma$                                           | $\delta$               |
| 1 - Ile        |          | 59.89    | 39.33   | CH <sub>2</sub> - 26.88<br>CH <sub>3</sub> - 14.61 | 17.82                  |
| 2 - Dhb        |          | 133.38   | 129.68  | 16.56                                              |                        |
| 3 - Lan (Dha)  | 173.95   | 57.18    | 37.83   |                                                    |                        |
| 4 - Ile        | 177.48   | 60.79    | 39.25   | CH <sub>2</sub> - 27.63<br>CH <sub>3</sub> - 13.91 | 18.98                  |
| 5 - Dha        |          | 132.79   | 107.03  |                                                    |                        |
| 6 - Leu        |          | 55.18    | 41.04   | 40.86                                              | a - 25.02<br>b - 26.36 |
| 7 - Lan (Cys)  |          | 56.93    | 43.26   |                                                    |                        |
| 8 - Ala        | 176.99   | 50.72    | 20.35   |                                                    |                        |

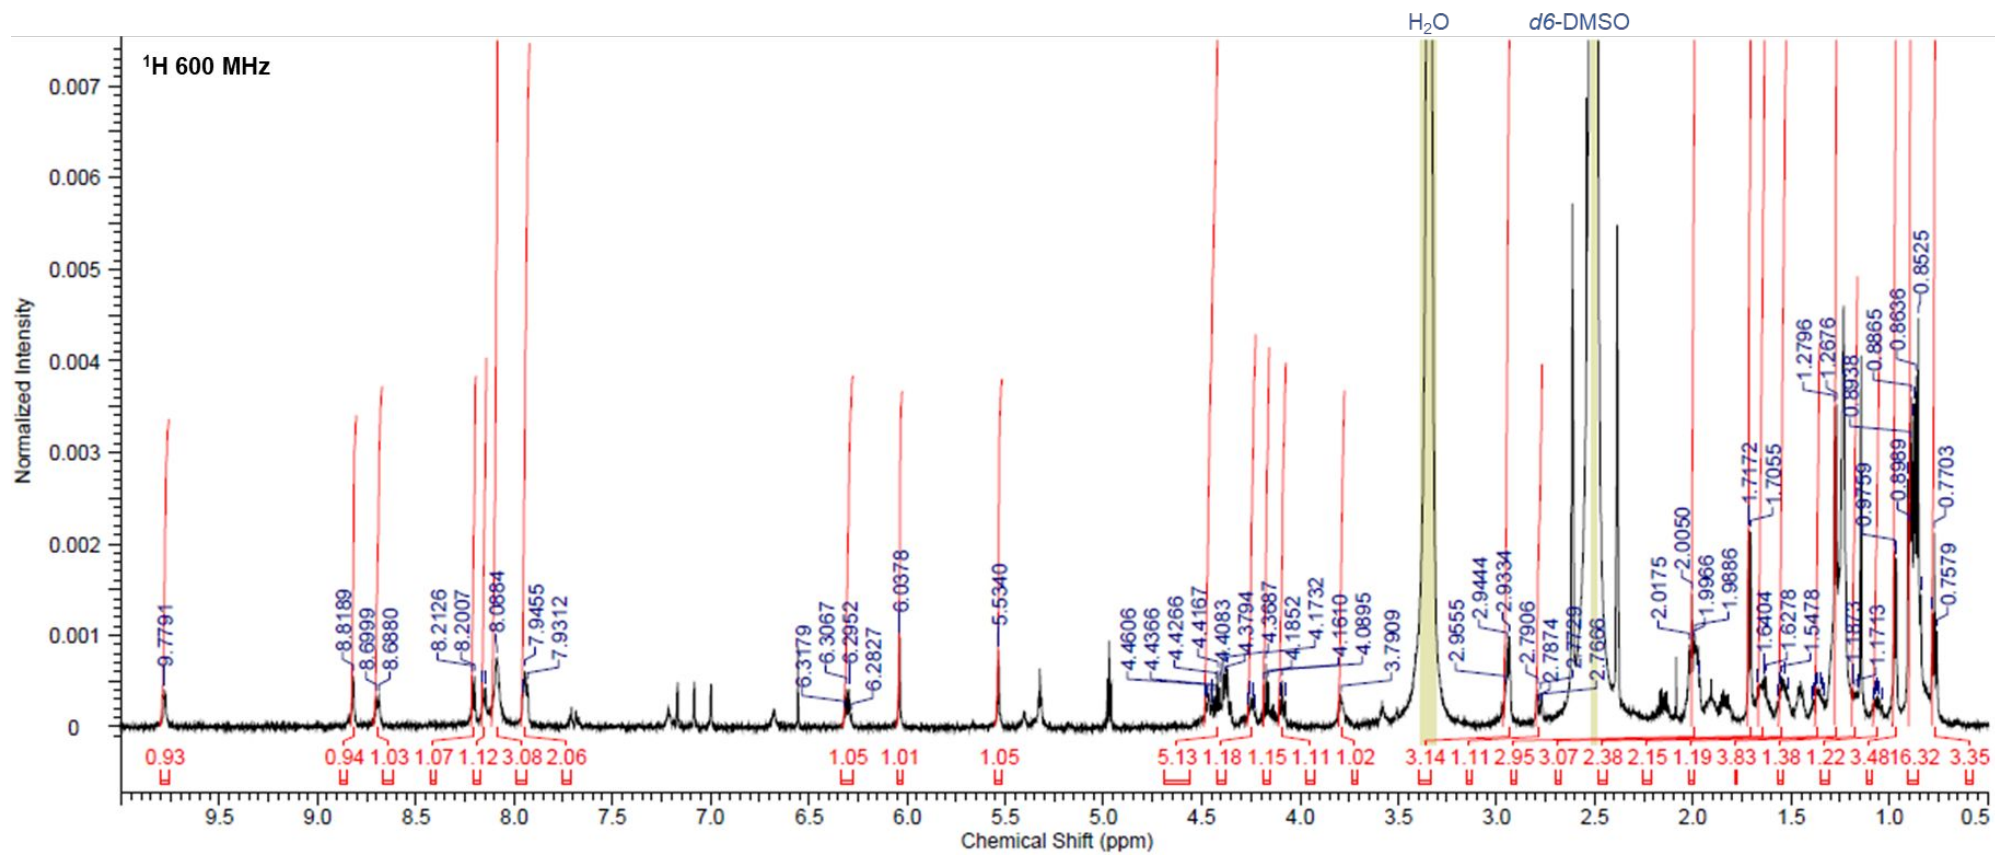

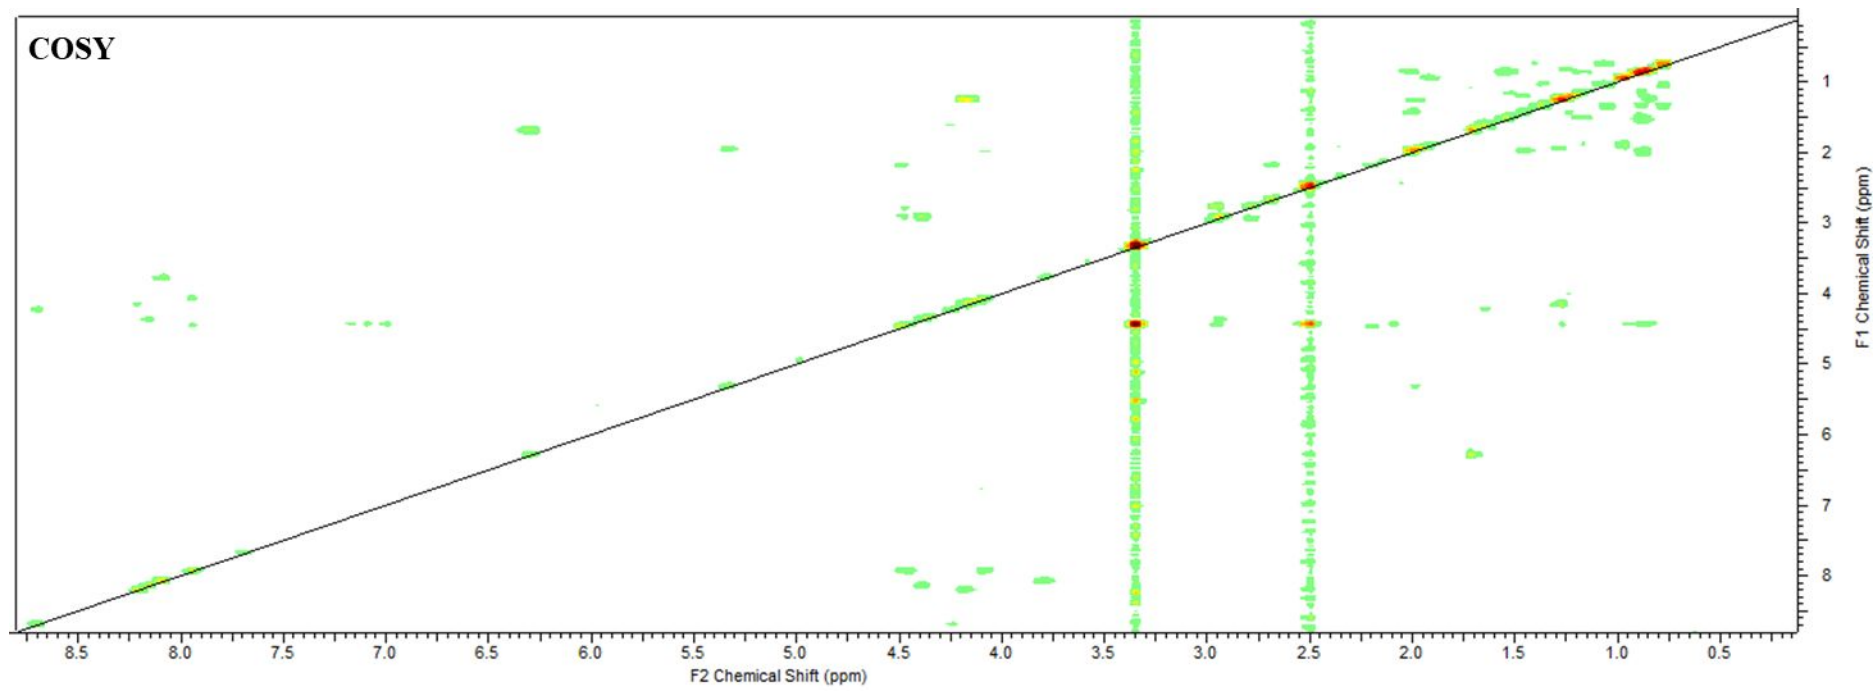

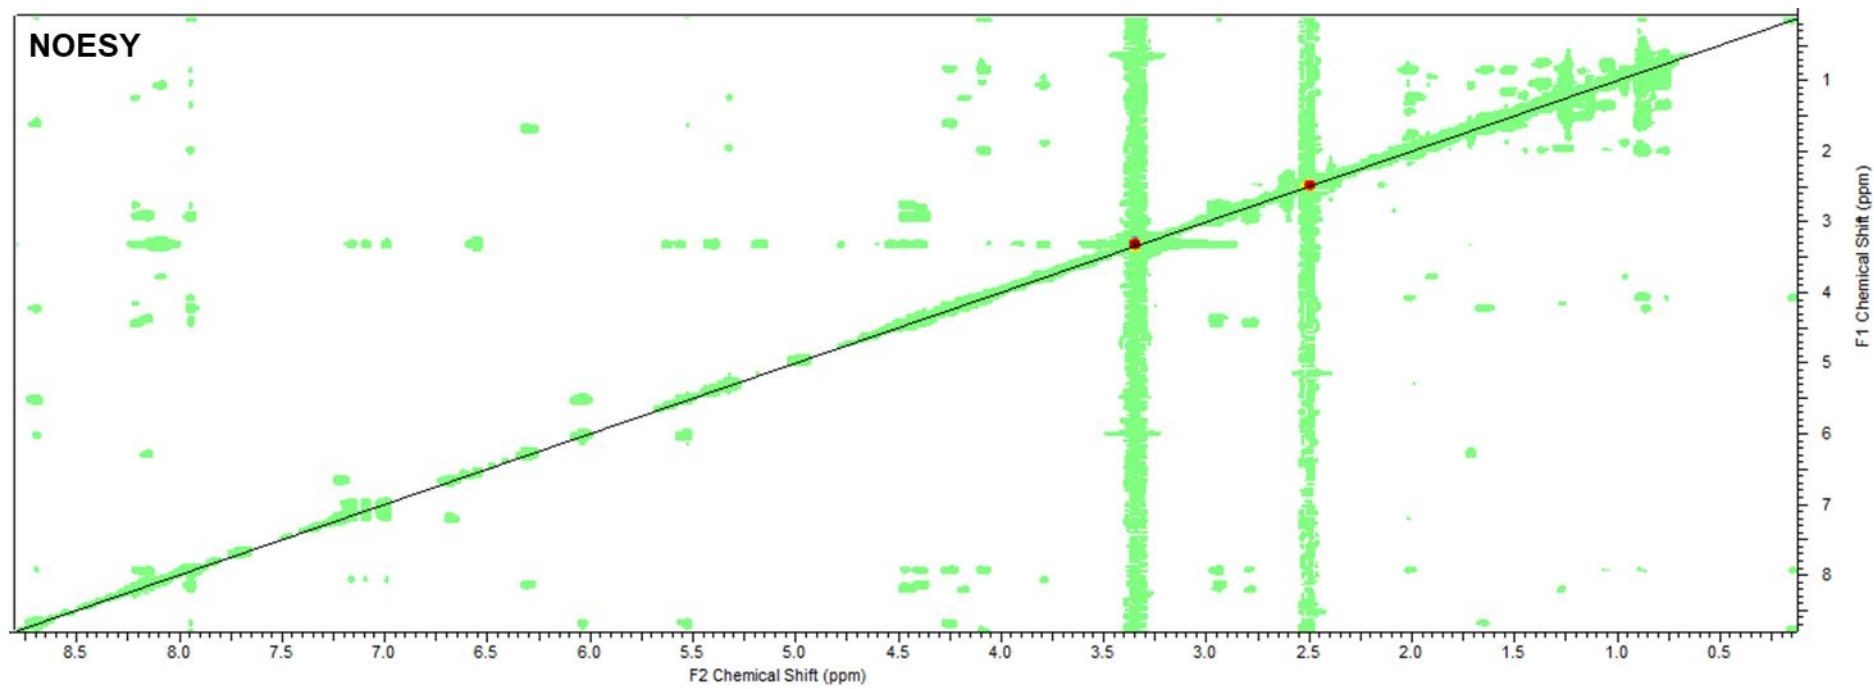

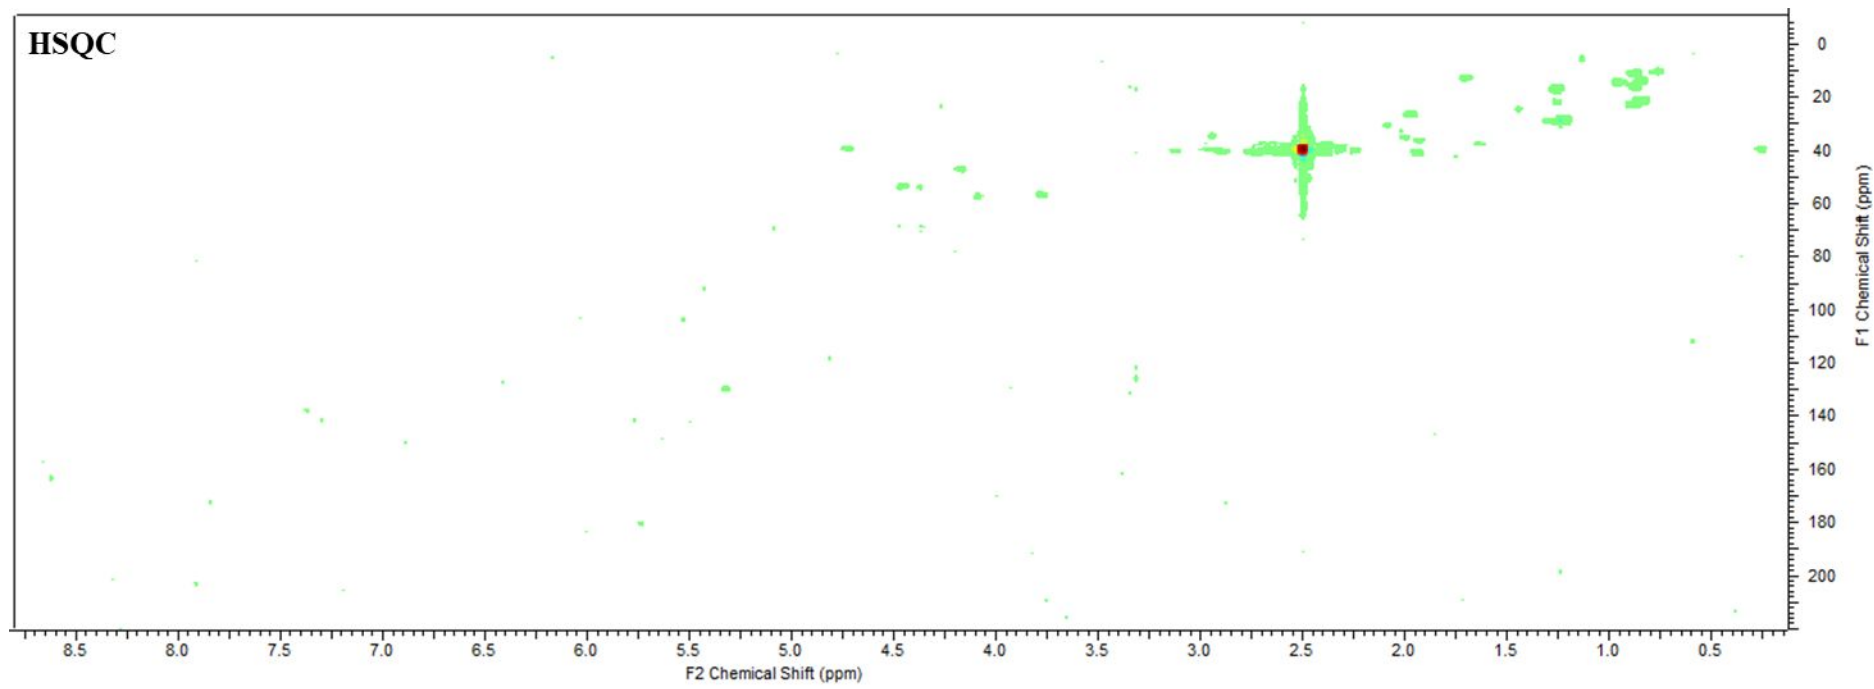

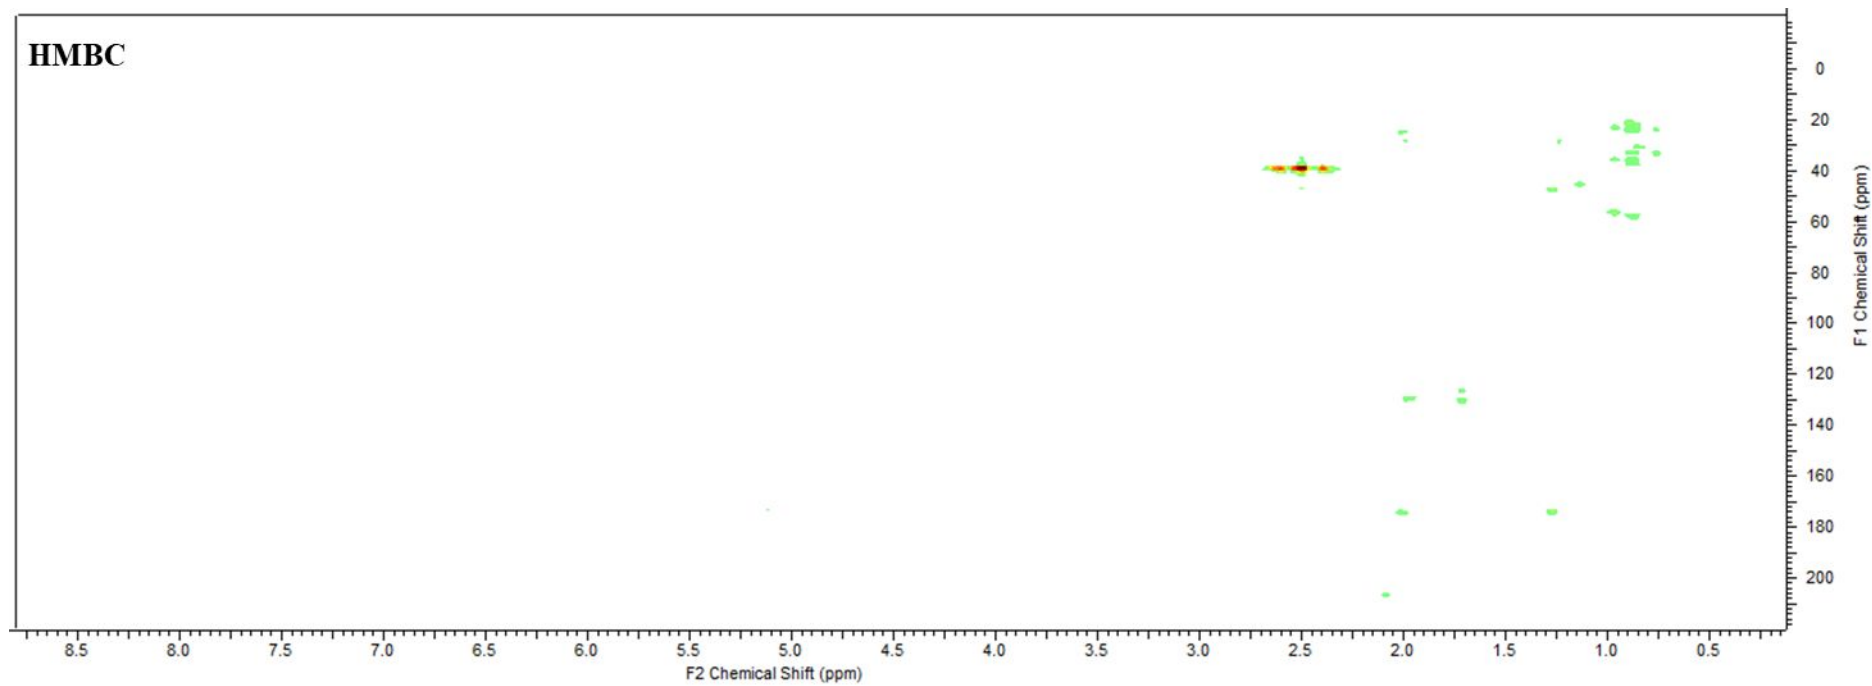

## XPLOR-NIH Parameterisation Data

As it was necessary to have new atom types to define the dehydro residues, a key to these is provided:

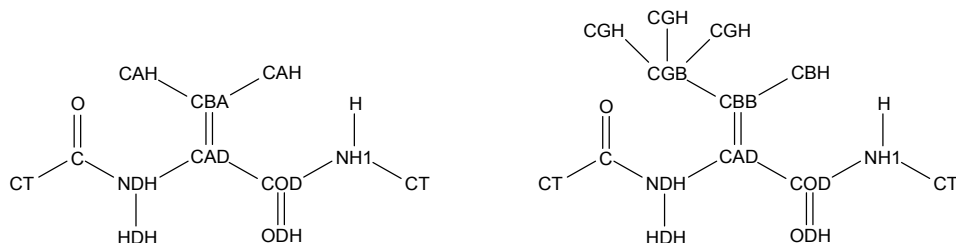

The new topology required for Dha, Dhb and  $\alpha$ -aminobutyric acid, as well as patches to create the lanthionine and methylanthionine bridges, were added to the XPLOR protein.top file:

```
!  
! xplor-nih protein topology file, version 1.0  
!
```

```
residue DHA  
  group  
    atom N   type=NDH charge=-0.56 end  
    atom HN  type=HDH charge= 0.30 end  
  group  
    atom CA  type=CAD charge= 0.26 end  
  group  
    atom CB  type=CBA charge=-0.46 end  
    atom HB1 type=CAH charge= 0.23 end  
    atom HB2 type=CAH charge= 0.23 end  
  group  
    atom C   type=COD charge= 0.60 end  
    atom O   type=ODH charge=-0.60 end  
  
bond N   HN  
bond N   CA  
bond CA  CB   bond CB  HB1   bond CB  HB2  
bond CA  C  
bond C   O  
  
improper CA CB C   N  
improper CB CA HB1 HB2  
improper HB1 CB CA C  
improper HB2 CB CA N  
  
end
```



```

residue DHB
  group
    atom N      type=NDH charge=-0.56 end
    atom HN     type=HDH charge= 0.30 end
  group
    atom CA     type=CAD charge= 0.26 end
  group
    atom CB     type=CBB charge=-0.17 end
    atom HB     type=CBH charge= 0.17 end
  group
    atom CG     type=CGB charge=-0.30 end
    atom HG1    type=CGH charge= 0.10 end
    atom HG2    type=CGH charge= 0.10 end
    atom HG3    type=CGH charge= 0.10 end
  group
    atom C      type=COD charge= 0.60 end
    atom O      type=ODH charge=-0.60 end

  bond N  HN
  bond N  CA
  bond CA CB      bond CB HB
  bond CB CG      bond CG HG1      bond CG HG2      bond CG HG3
  bond CA C
  bond C  O

  improper CA      CB      C      N
  improper CB      CA      HB      CG
  improper HB      CB      CA      N
  improper CG      CB      CA      C

  improper HG1 HG2 CB HG3  !stereo methyl
  dihedral CG CB CA N

end

```

```

residue MEL      !! Abu for MeLan
  group
    atom N      type=NH1 charge=-0.36 end
    atom HN     type=H   charge= 0.26 end
  group
    atom CA     type=CT  charge= 0.00 end
    atom HA     type=HA  charge= 0.10 end
  group
    atom CB     type=CT  charge=-0.20 end
    atom HB1    type=HA  charge= 0.10 end
    atom HB2    type=HA  charge= 0.10 end
  group
    atom CG     type=CT  charge=-0.30 end
    atom HG1    type=HA  charge= 0.10 end
    atom HG2    type=HA  charge= 0.10 end

```

```

    atom HG3  type=HA  charge= 0.10 end
group
    atom C    type=C    charge= 0.48 end
    atom O    type=O    charge=-0.48 end

bond N  HN
bond N  CA      bond CA HA
bond CA CB      bond CB HB1      bond CB HB2
bond CB CG      bond CG HG1      bond CG HG2      bond CG HG3
bond CA C
bond C  O

improper HA N  C  CB      !stereo CA
improper HB1 HB2 CA CG      !stereo CB
improper HG1 HG2 CB HG3      !stereo methyl

dihedral CG  CB  CA  N

end

presidue DISU      ! lanthionine bridge ...CYS - S - CYS...
group
    delete      atom 1HG      end
    modify      atom 1CB      charge=-0.15  type=CT      end
    modify      atom 1SG      charge=-0.10  type=S      end
group
    delete      atom 2HG      end
    delete      atom 2SG      end
    modify      atom 2CB      charge=-0.15  type=CT      end

add bond 1SG 2CB

add angle 1CB 1SG 2CB
add angle 1SG 2CB 2CA
add angle 1SG 2CB 2HB1
add angle 1SG 2CB 2HB2

add improper 2HB1 2HB2 2CA 1SG

ADD DIHEdral 1SG 2CB 2CA 2N

end

presidue MDIS      ! methyllanthionine bridge ...MEL - S - CYS...
group
    delete      atom 1HB2      end
    modify      atom 1CB      charge=-0.10  type=CT      end
group
    delete      atom 2HG      end
    modify      atom 2SG      charge=-0.10  type=S      end
    modify      atom 2CB      charge=-0.10  type=CT      end

```

```

add bond 1CB 2SG

add angle 1CB 2SG 2CB
add angle 1CA 1CB 2SG
add angle 2SG 1CB 1HB1
add angle 2SG 1CB 1CG

add improper 1HB1 1CA 2SG 1CG

ADD DIHEdral 1CB 2SG 2CB 2CA

end

```

The required bond lengths, angles, impropers and nonbonded approximations for Dha and Dhb were added to the XPLOR protein.par file under the relevant sections:

```

!
! xplor-nih protein parameter file, version 1.0
!

! BONDS
!
! Bonds for Dha/Dhb
bond      CAD  CBA          $kbon      1.34
bond      CAD  CBB          $kbon      1.34
bond      CAD  COD          $kbon      1.489
bond      CAD  NDH          $kbon      1.39
bond      COD  NH1          $kbon      1.345
bond      C    NDH          $kbon      1.345
bond      NDH  HDH          $kbon      0.98
bond      COD  ODH          $kbon      1.231
bond      CBA  CAH          $kbon      1.08
bond      CBB  CBH          $kbon      1.08
bond      CBB  CGB          $kbon      1.53
bond      CGB  CGH          $kbon      1.08

! ANGLES
!
! Angles for Dha/Dhb
angle     CBA  CAD  COD          $kang      120.0
angle     CBB  CAD  COD          $kang      120.0
angle     NDH  CAD  CBA          $kang      128.0
angle     NDH  CAD  CBB          $kang      128.0
angle     NDH  CAD  COD          $kang      110.0
angle     CAD  CBA  CAH          $kang      120.5
angle     CAD  COD  ODH          $kang      122.5
angle     HDH  NDH  CAD          $kang      117.0

```

|       |     |     |     |        |       |
|-------|-----|-----|-----|--------|-------|
| angle | CAD | CBB | CGB | \$kang | 126.5 |
| angle | CT  | C   | NDH | \$kang | 116.5 |
| angle | O   | C   | NDH | \$kang | 122.5 |
| angle | C   | NDH | HDH | \$kang | 123.0 |
| angle | C   | NDH | CAD | \$kang | 120.0 |
| angle | CAD | COD | NH1 | \$kang | 116.5 |
| angle | ODH | COD | NH1 | \$kang | 122.5 |
| angle | COD | NH1 | H   | \$kang | 123.0 |
| angle | COD | NH1 | CT  | \$kang | 120.0 |
| angle | CAH | CBA | CAH | \$kang | 120.0 |
| angle | CGH | CGB | CGH | \$kang | 109.5 |
| angle | CBH | CBB | CGB | \$kang | 120.0 |
| angle | CAD | CBB | CBH | \$kang | 120.0 |
| angle | CBB | CGB | CGH | \$kang | 109.5 |

! IMPROPER

!

! Improper for Dha/Dhb

|          |     |     |     |     |         |   |         |       |
|----------|-----|-----|-----|-----|---------|---|---------|-------|
| improper | CGH | CGH | CGB | CGH | \$kchi  | 0 | -66.514 | ! Dhb |
| methyl   |     |     |     |     |         |   |         |       |
| improper | HDH | NDH | CAD | COD | \$kpla  | 0 | 0.0     |       |
| improper | CBA | CAD | NDH | HDH | \$kpla  | 0 | 180.0   |       |
| improper | NDH | CAD | CBB | CBH | \$kpla  | 0 | 180.0   |       |
| improper | NDH | CAD | CBB | CGB | \$kpla  | 0 | 0.0     |       |
| improper | HDH | NDH | CAD | CBB | \$kpla  | 0 | 180.0   |       |
| improper | CBH | CBB | CAD | NDH | \$kpla  | 0 | 180.0   |       |
| improper | CT  | C   | NDH | HDH | \$kpx   | 0 | 0.0     |       |
| improper | CAD | COD | NH1 | H   | \$kpx   | 0 | 0.0     |       |
| improper | O   | C   | NDH | HDH | \$kpla  | 0 | 180.0   |       |
| improper | O   | C   | NDH | CAD | \$kpx   | 0 | 0.0     |       |
| improper | ODH | COD | NH1 | H   | \$kpla  | 0 | 180.0   |       |
| improper | ODH | COD | NH1 | CT  | \$kpx   | 0 | 0.0     |       |
| improper | CAD | COD | NH1 | CT  | \$kpx   | 0 | 180.0   |       |
| improper | COD | CAD | NH1 | CT  | \$kback | 0 | 180.0   | ! cis |
| pep bond |     |     |     |     |         |   |         |       |
| improper | COD | CAD | CBA | CAH | \$kpla  | 0 | 180.0   |       |
| improper | NDH | CAD | CBA | CAH | \$kpla  | 0 | 180.0   |       |
| improper | C   | NDH | CAD | COD | \$kpla  | 0 | 180.0   |       |
| improper | CBB | CAD | COD | ODH | \$kpla  | 0 | 180.0   |       |
| improper | CBA | CAD | COD | ODH | \$kpla  | 0 | 180.0   |       |
| improper | NH1 | CT  | C   | NDH | \$kpla  | 0 | 180.0   |       |
| improper | NH3 | CT  | C   | NDH | \$kpla  | 0 | 180.0   |       |
| improper | CT  | C   | NDH | CAD | \$kpx   | 0 | 180.0   |       |
| improper | C   | CT  | NDH | CAD | \$kback | 0 | 180.0   | ! cis |
| pep bond |     |     |     |     |         |   |         |       |
| improper | CGB | CBB | CAD | COD | \$kpla  | 0 | 180.0   |       |
| improper | NDH | CAD | COD | ODH | \$kpla  | 0 | 0.0     |       |
| improper | C   | NDH | CAD | CBA | \$kpla  | 0 | 0.0     |       |
| improper | C   | NDH | CAD | CBB | \$kpla  | 0 | 0.0     |       |
| improper | NDH | CAD | COD | NH1 | \$kpla  | 0 | 180.0   |       |
| improper | COD | NH1 | CT  | C   | \$kpla  | 0 | 180.0   |       |

```

improper  CBB  CAD  COD  NH1      $kpla  0  0.0
improper  CBA  CAD  COD  NH1      $kpla  0  0.0
improper  CAD  CBB  CGB  CGH      $kpla  0  0.0  !  dhb
C(O)-gammaH eclipsed
improper  COD  CAD  NDH  ODH      $kpla  0  0.0  !
planar around CO
improper  C    CT   O    NDH      $kpla  0  0.0  !
planar around CO
improper  NDH  C    HDH  CAD      $kpla  0  0.0  !
planar around NH
improper  CAD  NDH  COD  CBA      $kpla  0  0.0
improper  CBA  CAH  CAH  CAD      $kpla  0  0.0
improper  COD  NH1  ODH  CAD      $kpla  0  0.0
improper  NH1  COD  H    CT      $kpla  0  0.0
improper  CAD  NDH  CBA  COD      $kpla  0  0.0
improper  COD  CAD  ODH  NH1      $kpla  0  0.0  0.0
improper  COD  CAD  NH1  ODH      $kpla  0  0.0
improper  CAD  CBA  COD  NDH      $kpla  0  0.0
improper  CAD  CBB  COD  NDH      $kpla  0  0.0
improper  CGH  CGH  CBB  CGH      $kchi  0 -66.514  !
betaC-gammaH
improper  CBA  CAD  CAH  CAH      $kpla  0  0.0
improper  CAD  CBA  COD  NH1      $kpla  0  0.0
improper  CAD  CBB  COD  NH1      $kpla  0  0.0
improper  CBB  CAD  CBH  CGB      $kpla  0  0.0
improper  COD  NH1  CBA  CAH      $kpla  0  0.0

```

!NONBONDED

!

!nonbonded approximations based on existing types in protein.par (C=C of Dh approximated as CA)

```

nonbonded  NDH      0.1592  2.7618      0.1592  2.7618
nonbonded  ODH      0.2342  2.6406      0.2342  2.6406
nonbonded  COD      0.0903  3.2072      0.0903  3.2072
nonbonded  HDH      0.0498  1.4254      0.0498  1.4254
nonbonded  CGH      0.0045  2.6157      0.0045  2.6157
nonbonded  CAH      0.0045  2.6157      0.0045  2.6157
nonbonded  CBH      0.0045  2.6157      0.0045  2.6157
nonbonded  CAD      0.120   3.2072      0.120   3.2072
nonbonded  CBA      0.120   3.2072      0.120   3.2072
nonbonded  CBB      0.120   3.2072      0.120   3.2072
nonbonded  CGB      0.0903  3.2072      0.0903  3.2072

```

## Structure Statistics

Statistics were generated by the Protein Structure Validation Suite (PSVS).<sup>2</sup>

Percentage of residues in Ramachandran disallowed regions is from Procheck analysis.<sup>3</sup>

**Table S18**

|                                                  | Mutacin I ring B |           | Nisin ring B (2) | Nisin ring B Lan analogue (3) | Mutacin I ring A (12) | Mutacin I ring A (Ser5) analogue (15) | Mutacin I ring A (Ser2, Ala5, Ala8) analogue (14) | Nisin ring A (13) |
|--------------------------------------------------|------------------|-----------|------------------|-------------------------------|-----------------------|---------------------------------------|---------------------------------------------------|-------------------|
|                                                  | Major (1)        | Minor (1) |                  |                               |                       |                                       |                                                   |                   |
| <b><u>Distance Restraints</u></b>                |                  |           |                  |                               |                       |                                       |                                                   |                   |
| <b>Inter-residue NOE</b>                         |                  |           |                  |                               |                       |                                       |                                                   |                   |
| i - i+1                                          | 11               | 3         | 15               | 8                             | 32                    | 19                                    | 22                                                | 11                |
| i - i>1                                          | 7                | 1         | 10               | 7                             | 7                     | 5                                     | 3                                                 | 3                 |
| <b>Dihedral Angles</b>                           |                  |           |                  |                               |                       |                                       |                                                   |                   |
| Backbone                                         | 5                | 4         | 3                | 3                             | 3                     | 5                                     | 5                                                 | 4                 |
| <b><u>Structure Statistics</u></b>               |                  |           |                  |                               |                       |                                       |                                                   |                   |
| <b>Pairwise RMSD (Å)</b>                         |                  |           |                  |                               |                       |                                       |                                                   |                   |
| Heavy atoms                                      | 0.6              | 1.2       | 0.8              | 0.8                           | 1.2                   | 0.8                                   | 1.8                                               | 1.7               |
| Backbone atoms                                   | 0.1              | 0.6       | 0.2              | 0.2                           | 0.5                   | 0.3                                   | 1.2                                               | 1.0               |
| <b>RMSD from ideality</b>                        |                  |           |                  |                               |                       |                                       |                                                   |                   |
| Bond length (Å)                                  | 0.007            | 0.005     | 0.010            | 0.010                         | 0.010                 | 0.004                                 | 0.007                                             | 0.005             |
| Bond angle (°)                                   | 1.7              | 1.5       | 1.5              | 1.5                           | 1.9                   | 1.7                                   | 1.5                                               | 1.5               |
| % of residues in Ramachandran disallowed regions | 0                | 0         | 0                | 0                             | 0                     | 0                                     | 6.7                                               | 6.7               |

## Dihedral Angle Data

**Table S19.** Measured dihedral angles for ring B peptides.

|                                     | <b>i + 1<sup>a,b</sup></b> |        | <b>i + 2<sup>a,c</sup></b> |           | <b>C<math>\alpha</math>(i) -<br/>C<math>\alpha</math>(i+4)<br/>Distance (Å)</b> |
|-------------------------------------|----------------------------|--------|----------------------------|-----------|---------------------------------------------------------------------------------|
|                                     | $\phi$                     | $\psi$ | $\phi$                     | $\psi$    |                                                                                 |
| WT Nisin B ( <b>2</b> )             | -127                       | 35     | 5 / -115                   | 18 / -102 | 3.66                                                                            |
| WT Mutacin I B (major) ( <b>1</b> ) | -120                       | 132    | 31 / 152                   | 39 / -81  | 4.29                                                                            |
| WT Mutacin I B (minor) ( <b>1</b> ) | -111                       | -18    | -42 / -161                 | -56 / 63  | 4.68                                                                            |
| Nisin B Lan analogue ( <b>3</b> )   | -140                       | 9      | 24 / -96                   | 12 / -108 | 4.24                                                                            |
| PDB: 1WCO                           | -114                       | 26     | -26/-145                   | 44/-75    | 4.61                                                                            |

<sup>a</sup> i + 1 = Pro/Leu, i + 2 = Gly.

<sup>b</sup>  $\phi$  dihedrals for Pro were measured to C $\beta$  i.e. C $\beta$ -N-C $\alpha$ -H $\alpha$ .

<sup>c</sup> Two values are given as dihedrals were measured to both H $\alpha$ .

**Table S20.** Measured dihedral angles for ring A peptides.

|                                                          | <b>i + 1<sup>a</sup></b> |        | <b>i + 2<sup>a,b</sup></b> |        | <b>i + 3<sup>a</sup></b> |        | <b>C<math>\alpha</math>(i) - C<math>\alpha</math>(i+5)<br/>Distance (Å)</b> |
|----------------------------------------------------------|--------------------------|--------|----------------------------|--------|--------------------------|--------|-----------------------------------------------------------------------------|
|                                                          | $\phi$                   | $\psi$ | $\phi$                     | $\psi$ | $\phi$                   | $\psi$ |                                                                             |
| WT Nisin A ( <b>13</b> )                                 | -123                     | 32     | -125                       | -82    | 155                      | 169    | 5.02                                                                        |
| WT Mutacin I A ( <b>12</b> )                             | -153                     | 47     | -148                       | 87     | 77                       | 16     | 4.64                                                                        |
| Mutacin I A (Ser5)<br>analogue ( <b>15</b> )             | -89                      | 26     | -153                       | 6      | -140                     | 19     | 4.03                                                                        |
| Mutacin I A (Ser2, Ala5,<br>Ala8) analogue ( <b>14</b> ) | 174                      | -8     | 157                        | 40     | 159                      | 113    | 4.61                                                                        |
| PDB: 1WCO                                                | -172                     | 41     | -122                       | -112   | -157                     | 135    | 4.74                                                                        |

<sup>a</sup> i + 1 = Ile/Leu, i + 2 = Dha/Ser/Ala, i + 3 = Leu.

<sup>b</sup> Dihedrals for Dha were measured to C $\beta$  i.e.  $\phi$  = NH-N-C $\alpha$ -C $\beta$ ,  $\psi$  = CO-C-C $\alpha$ -C $\beta$ .

## **References**

- 1) Vranken, W. F.; Boucher, W.; Stevens, T. J.; Fogh, R. H.; Pajon, A.; Llinas, M.; Ulrich, E. L.; Markley, J. L.; Ionides, J.; Laue, E. D. The CCPN data model for NMR spectroscopy: Development of a software pipeline. *Proteins: Struct., Funct., Bioinf.* **2005**, *59*, 687–696
- 2) Bhattacharya, A.; Tejero, R.; Montelione, G. T. Evaluating protein structures determined by structural genomics consortia. *Proteins: Struct., Funct., Bioinf.* **2007**, *66*, 778–795.
- 3) Laskowski, R. A.; MacArthur, M. W.; Moss, D. S.; Thornton, J. M. Procheck – A program to check the stereochemical quality of protein structures. *J. Appl. Crystallogr.* **1993**, *26*, 283 – 291.
